# Supplementary material for: Qualitative process study to explore the perceived burdens and benefits of a digital intervention for self-managing high blood pressure in Primary Care in the UK
Source: PubMed Central journal article supplement (PMC5942415; doi:10.1136/bmjopen-2017-020843), 2018-05-08
Supplement: bmjopen-2017-020843.draft_revisions.pdf [file bmjopen-2017-020843.draft_revisions.pdf]

# BMJ Open

BMJ Open is committed to open peer review. As part of this commitment we make the peer review history of every article we publish publicly available.

When an article is published we post the peer reviewers' comments and the authors' responses online. We also post the versions of the paper that were used during peer review. These are the versions that the peer review comments apply to.

The versions of the paper that follow are the versions that were submitted during the peer review process. They are not the versions of record or the final published versions. They should not be cited or distributed as the published version of this manuscript.

BMJ Open is an open access journal and the full, final, typeset and author-corrected version of record of the manuscript is available on our site with no access controls, subscription charges or pay-per-view fees (<http://bmjopen.bmj.com>).

If you have any questions on BMJ Open's open peer review process please email [info.bmjopen@bmj.com](mailto:info.bmjopen@bmj.com)

# BMJ Open

## Perceived burdens and benefits of self-management interventions: A qualitative process study of an online intervention for self-managing high blood pressure.

|                               |                                                                                                                                                                                                                                                                                                                                                                                                                                                                                                                                                                                                                                         |
|-------------------------------|-----------------------------------------------------------------------------------------------------------------------------------------------------------------------------------------------------------------------------------------------------------------------------------------------------------------------------------------------------------------------------------------------------------------------------------------------------------------------------------------------------------------------------------------------------------------------------------------------------------------------------------------|
| Journal:                      | <i>BMJ Open</i>                                                                                                                                                                                                                                                                                                                                                                                                                                                                                                                                                                                                                         |
| Manuscript ID                 | bmjopen-2017-020843                                                                                                                                                                                                                                                                                                                                                                                                                                                                                                                                                                                                                     |
| Article Type:                 | Research                                                                                                                                                                                                                                                                                                                                                                                                                                                                                                                                                                                                                                |
| Date Submitted by the Author: | 27-Nov-2017                                                                                                                                                                                                                                                                                                                                                                                                                                                                                                                                                                                                                             |
| Complete List of Authors:     | Morton, Katherine; University of Southampton, Psychology<br>Dennison, Laura; University of Southampton, Psychology<br>Bradbury, Katherine; University of Southampton, Psychology<br>Band, Rebecca; University of Southampton, Psychology<br>May, Carl; University of Southampton, Faculty of Health Sciences<br>Raftery, James; Southampton University, School of Medicine<br>Little, Paul; University of Southampton, Primary Care and Population Science<br>McManus, Richard; University of Oxford, Dept of Primary Care Health Sciences<br>Yardley, Lucy ; University of Oxford, Nuffield Department of Primary Health Care Sciences |
| Keywords:                     | Self-management, digital intervention, qualitative, treatment burden                                                                                                                                                                                                                                                                                                                                                                                                                                                                                                                                                                    |
|                               |                                                                                                                                                                                                                                                                                                                                                                                                                                                                                                                                                                                                                                         |

SCHOLARONE™  
Manuscripts

Only

1  
2  
3  
4  
5  
6 **1 Title page**  
7  
8  
9

10 **2 Perceived burdens and benefits of self-management interventions: A qualitative process**  
11  
12 **3 study of an online intervention for self-managing high blood pressure.**  
13  
14

15 4 Kate Morton<sup>a\*</sup>, Laura Dennison<sup>a</sup>, Katherine Bradbury<sup>a</sup>, Rebecca Band<sup>a</sup>, Carl May<sup>b</sup>, James Raftery<sup>c</sup>,  
16  
17 5 Paul Little<sup>d</sup>, Richard J. McManus<sup>e</sup>, & Lucy Yardley<sup>a</sup>  
18  
19

20 6 a. Academic unit of psychology, University of Southampton, Southampton, UK  
21

22 7 b. Faculty of Health Sciences, University of Southampton, Southampton, UK  
23

24 8 c. Faculty of Medicine, University of Southampton, Southampton, UK  
25

26 9 d. Primary Care Research, University of Southampton, Southampton, UK  
27

28  
29 10 e. Nuffield Department of Primary Care Health Sciences, University of Oxford, Oxford, UK  
30  
31

32 11  
33  
34  
35

36 12 \*Corresponding author: [ksm1r13@soton.ac.uk](mailto:ksm1r13@soton.ac.uk); 02380 592234  
37  
38

39 13 Room 3063, B44, University of Southampton, Southampton, SO17 1BJ  
40  
41

42 14  
43  
44

45 15 Word count 4888  
46  
47

48 16  
49  
50

51 17  
52  
53

54 18  
55  
56  
57  
58  
59  
60

1  
2  
3 19  
4  
5  
6  
78 **20 ABSTRACT**

9  
10  
11 **Objectives:** Digital health interventions can change patients' experiences of managing their health,  
12 either creating additional burden or improving their experience of healthcare. This qualitative study  
13 aims to explore perceived burdens and benefits for patients using an online self-management  
14 intervention for high blood pressure. A secondary aim is to further our understanding of how best to  
15 capture these outcomes when evaluating health interventions.  
16  
17  
18  
19  
20  
21

22 **Design:** Inductive qualitative process study nested in a randomised controlled trial.  
23  
24

25 **Setting:** Primary Care in the UK  
26  
27

28 **Participants:** 35 participants taking antihypertensive medication and with uncontrolled blood  
29 pressure at baseline took part in semi-structured telephone interviews.  
30  
31

32 **Intervention:** Online self-management intervention to support blood pressure self-monitoring and  
33 medication change when recommended by the healthcare professional.  
34  
35  
36  
37

38 **Analysis:** Data were analysed using inductive thematic analysis with techniques from grounded  
39 theory.  
40  
41  
42

43 **Results:** Seven themes were developed which reflected perceived burdens and benefits of using the  
44 intervention, including worry about health, uncertainty about self-monitoring, and reassurance. A  
45 model was developed to show how beliefs about their condition and treatment appeared to  
46 influence participants' appraisal of the value of the intervention, suggesting that considering illness  
47 and treatment perceptions in Burden of Treatment theory could further our understanding of how  
48 individuals appraise the personal costs and benefits of self-managing their health.  
49  
50  
51  
52  
53  
54  
55  
56  
57  
58  
59  
60

1  
2  
3 40 **Conclusions:** Patients' appraisal of the burden or benefit of using a complex self-management  
4  
5 41 intervention seemed to be influenced by both experiences within the intervention (such as  
6  
7 42 perceived availability of support) and beliefs about their condition and treatment (such as perceived  
8  
9 43 control and risk of side effects). Developing our ability to adequately capture these salient burdens  
10  
11 44 and benefits for patients could help enhance evaluation of self-management interventions in future.  
12  
13 45 Many participants perceived important benefits from using the intervention, highlighting the need  
14  
15 46 for theory to allow that engaging in self-management can include positive as well as negative  
16  
17 47 aspects.  
18  
19  
20 48

21  
22  
23 49 Trial registration: ISRCTN13790648. Registered 14 May 2015.  
24

25 50 **Keywords:** Self-management; digital intervention; qualitative; treatment burden  
26  
27

28 51 **Strengths and limitations of this study:**

- 29 52 ❖ The exploratory, open approach to data collection enabled us to capture whichever benefits or  
30  
31 53 burdens were most salient to the participants.  
32  
33 54 ❖ This inductive approach highlighted some novel reactions to using self-management digital  
34  
35 55 interventions.  
36  
37 56 ❖ We only interviewed participants at one point in time, so were unable to gain an understanding  
38  
39 57 of dynamic changes in perceived benefits or burdens over time.  
40  
41 58 ❖ Both well and poorly controlled hypertensive patients took part in the interviews, but it was  
42  
43 59 difficult to recruit low users of the intervention which could limit the generalisability of the  
44  
45 60 findings.  
46  
47 61 ❖ Qualitative data is not commonly used in health economics evaluation, so further work would be  
48  
49 62 needed to understand how relevant outcomes could best be captured quantitatively.  
50  
51  
52  
53  
54  
55  
56  
57  
58  
59  
60  
61  
62  
63  
64

## 65 BACKGROUND

66 The work involved in looking after one's health when living with a chronic condition can include  
67 complex tasks such as organising and adhering to treatment regimes, interacting with healthcare  
68 professionals (HCPs), regular monitoring of health indicators, and making health-related decisions,  
69 all of which can accumulate into a considerable burden for people<sup>1</sup>. Digital self-management  
70 interventions are often developed to improve health outcomes, but these interventions could also  
71 either increase or minimise the burden of the process of healthcare for patients. Developing our  
72 understanding of the burdens of self-management can help to better optimise the delivery of  
73 healthcare to improve adherence and well-being<sup>1-3</sup>. Burden of Treatment (BoT) theory provides a  
74 mechanism for understanding these experiences in the context of patients' personal capacity to  
75 cope, with emphasis on the role of wider healthcare systems and social networks available to the  
76 patient<sup>1</sup>.

77 Health economic evaluations also focus on understanding the impact of healthcare on patients,  
78 seeking to weigh up the resources used against the health outcomes in order to better inform  
79 decision-making. Recent guidelines for economic evaluations in health and medicine recommend  
80 adopting a societal perspective such that all relevant outcomes are evaluated, rather than focusing  
81 only on formal healthcare costs<sup>4</sup>. In particular, personal costs such as time spent in self-care should  
82 be included. Consequently, BoT theory and health economic evaluations share an interest in  
83 adequately capturing the wider burdens or personal costs of engaging with healthcare. For  
84 consistency in terminology in this paper, negative outcomes/personal costs of healthcare will be  
85 referred to as 'burdens'.

86 BoT theory considers patients' time spent on healthcare as a resource that is used by the healthcare  
87 system, while health economic evaluation counts time as an 'opportunity cost' whereby the patient  
88 'spends' time that could have been spent on something other than healthcare. However, subjective  
89 experiences of time spent on digital interventions may be varied and complex. Heterogeneity in the

1  
2  
3 90 relative value placed on the outcomes of the intervention<sup>5</sup> may mean that for some participants the  
4  
5 91 time spent engaging with elements of an intervention is not perceived as a burden but rather as a  
6  
7 92 benefit, either because it is interesting, pleasant or meaningful in and of itself or because of the  
8  
9 93 positive outcomes it can lead to. In other words, some people may actually like engaging with  
10  
11 94 healthcare. The value of exploring the personal benefits of intervention participation has not  
12  
13 95 received as much focus as understanding the costs, such as treatment burden. McNamee et al.<sup>6</sup>  
14  
15 96 propose that the health research guidelines for economic analysis may need to be adjusted for  
16  
17 97 digital health interventions to ensure we can fully capture the heterogeneous costs and benefits  
18  
19 98 arising when complex interventions are implemented in complex systems.

20  
21  
22  
23 99 To further our understanding of how patients perceive benefits and burdens when using digital  
24  
25 100 health interventions, we carried out a qualitative process study. The online HOME BP intervention  
26  
27 101 was developed based on best practice recommendations to help improve hypertension in poorly  
28  
29 102 controlled patients by facilitating self-monitoring of blood pressure (BP) at home and prompting  
30  
31 103 appropriate intensification of medication by healthcare professionals<sup>7</sup>. This intervention could help  
32  
33 104 to minimise the treatment burden of hypertension by providing a healthcare system in which HCPs  
34  
35 105 have sight of patients' home readings, streamlining the process for finding the most effective  
36  
37 106 medication without the need for attending the GP Practice. However, HOME BP is a complex,  
38  
39 107 interactive multi-component intervention, which creates potential diversity in the perceived burden  
40  
41 108 and benefits for participants using it. The contexts in which the intervention is embedded may also  
42  
43 109 be diverse, and factors such as individual differences in patients' health status, beliefs about  
44  
45 110 medication and risks of high BP, availability of time and resources, and access to support may  
46  
47 111 influence how the intervention is perceived and valued. The HOME BP intervention was developed  
48  
49 112 using the person-based approach<sup>8</sup> which emphasises the importance of understanding participants'  
50  
51 113 unique perspectives and different situations when developing and implementing digital  
52  
53 114 interventions. Adopting a more granular approach to the evaluation of benefit and burden is  
54  
55  
56  
57  
58  
59  
60

1  
2  
3 115 consistent with the person-based approach, and with the BoT approach of fully understanding the  
4  
5 116 participants' perspective.  
6  
7

8 117 The present study aimed to explore the perceived burden and benefits of using a digital health  
9  
10 118 intervention for self-managing BP using qualitative process interviews with intervention and usual  
11  
12 119 care participants taking part in a randomised controlled trial (RCT). This paper seeks to interpret  
13  
14 120 these findings in terms of the implications for optimising the capture of perceived costs and benefits  
15  
16 121 in health economic evaluations and evaluating the burden of treatment.  
17  
18

19  
20 122

## 23 123 **METHODS**

### 27 124 **Design**

30 125 A qualitative process study embedded in the Home BP trial<sup>7</sup> was approved by the University of  
31  
32 126 Southampton and NHS Research Ethics committees. The COREQ checklist (Consolidated criteria for  
33  
34 127 reporting qualitative studies) was used to ensure comprehensive reporting of the study<sup>9</sup>  
35  
36 128 (supplementary file 1).  
37  
38

39 129

### 43 130 **Intervention**

46 131 The HOME BP online programme supports participants to self-manage their high BP, primarily via  
47  
48 132 home self-monitoring of BP and making changes to dose/drug type when recommended by the HCP.  
49  
50 133 Lifestyle change modules are also available, but optional. Participants using HOME BP were  
51  
52 134 supported by a 'prescriber' (GP or nurse prescriber responsible for changing medication) and a  
53  
54 135 'supporter' (nurse or healthcare assistant who supported participants in self-monitoring and  
55  
56 136 choosing lifestyle changes). Table 1 describes the HOME BP intervention in more detail.  
57



137 Table 1 HOME BP Intervention Characteristics

| Target behaviour           | Description                                                                                                                                                                                                                                                                                                                                                                                                                                                                                                                    |
|----------------------------|--------------------------------------------------------------------------------------------------------------------------------------------------------------------------------------------------------------------------------------------------------------------------------------------------------------------------------------------------------------------------------------------------------------------------------------------------------------------------------------------------------------------------------|
| Self-monitoring BP         | Participants monitor their BP at home for 7 days every 4 weeks. After 7 days, they enter their BP readings into the HOME BP online programme and receive instant automated feedback using a traffic light system. If BP is very high (red) or very low (blue), they are told to contact their GP Practice. If BP is above target (amber), they are told their prescriber will contact them about a medication change. If BP is on target (green), they are congratulated and asked to monitor their BP again next time.        |
| Medication change          | The prescriber plans three potential medication changes with the participant at the start of the study. Prescribers are informed by email when a medication change is recommended and can implement a pre-planned change without needing to see the participant for an appointment.                                                                                                                                                                                                                                            |
| Optional lifestyle changes | Nine weeks after randomisation, participants have the option of choosing an online session to support lifestyle change to help control their BP, specifically weight management, salt reduction, healthy diet, physical activity, or alcohol reduction. Participants are alerted by email when this becomes available, and see an option to view the healthy lifestyles session each time they log on to HOME BP. The online lifestyle change sessions can be started at any time during the 12-month trial, after nine weeks. |

138

139

## 140 **Participants**

141 Patients were eligible to take part in the HOME BP trial if they had uncontrolled hypertension (mean  
142 BP reading of 140/90 mm Hg or more at baseline) managed in Primary Care, were prescribed 1-3  
143 antihypertensive medications at baseline, and aged over 18 (see<sup>7</sup> for full inclusion and exclusion  
144 criteria).

145 Both intervention and usual care participants were invited to take part in interviews as we felt that  
146 obtaining an understanding of managing BP in usual care would aid interpretation of the perceived  
147 burden and benefits of the intervention. We aimed to speak to participants at a range of time-points  
148 during the 12-month trial from 10 weeks onwards as this gave participants the opportunity to  
149 become familiar with HOME BP. No new intervention content was introduced after nine weeks.

## 150 **Recruitment and interview procedure**

151 A sub-sample of RCT participants were invited by email to provide feedback on their experiences of  
152 managing their BP (n=78). Informed consent was taken by post or online, depending on participant  
153 preference. Recruitment was initially opportunistic, but subsequently a purposive approach was  
154 adopted to target younger participants, low engagers, and those with recent uncontrolled self-  
155 monitored BP readings, informed by the concurrent analysis. Recruitment was stopped once the  
156 researchers agreed that data saturation had been reached and no new burdens or benefits were  
157 arising.

158 Semi-structured interview schedules were co-developed by experts in health psychology (KM, KB, RB,  
159 LY, LD), health economics (JR) and sociology (CM). Open, inductive questions were carefully selected  
160 to elicit data about the burden and benefits of BP management perceived as most salient by the  
161 participants (see Supplementary File 2 for interview schedules). The interviews were conducted by  
162 telephone to minimise the burden on participants, except in one case where the participant asked to  
163 meet face-to-face due to struggling with hearing on the telephone. The interviews took place

1  
2  
3 164 between February 2016 and February 2017. Each participant was given a £10 gift voucher to thank  
4  
5 165 them for their time.  
6  
7

8 166 All interviews were conducted by KM (MSc, BSc. Termed “the researcher”), a female PhD candidate  
9  
10 167 in Health Psychology who was also employed as a research assistant. Each interview was audio-  
11  
12 168 recorded, and the researcher also took notes and completed a self-reflection log afterwards to  
13  
14 169 record any emerging thoughts on the data. Audio-recordings were transcribed verbatim and checked  
15  
16 170 thoroughly by the researcher.  
17  
18

## 19 20 171 **Analysis** 21 22

23 172 The analysis was an iterative process led by KM, supported by frequent discussion of emerging  
24  
25 173 themes with LY and LD (who have extensive experience in qualitative research) along with input  
26  
27 174 regarding health economic and sociological perspectives (JR and CM). Inductive thematic analysis  
28  
29 175 methods were used<sup>10 11</sup> with techniques from grounded theory such as memoing, constant  
30  
31 176 comparison, and diagramming to enhance our understanding and facilitate the development of  
32  
33 177 higher themes<sup>12 13</sup>. Data collection and analysis ran concurrently to enable purposive sampling based  
34  
35 178 on analytic insights. Thorough line-by-line coding was undertaken in NVivo 10<sup>14</sup>, and a coding  
36  
37 179 manual was developed which evolved as more data were collected and coded. The emerging codes  
38  
39 180 were constantly checked against the raw data to ensure the analysis was driven by the participants’  
40  
41 181 own language and experiences.  
42  
43  
44

45 182 All data relating to burdens and benefits of managing BP were analysed. We also coded factors that  
46  
47 183 appeared to influence perceptions of burdens and benefits to facilitate an in-depth understanding of  
48  
49 184 how participants appraised the intervention’s value. A broad and open definition was adopted  
50  
51 185 whereby benefits and burdens were defined as positive and negative outcomes or experiences of  
52  
53 186 engaging in the intervention<sup>15</sup>, in order to facilitate a comprehensive representation of all potentially  
54  
55 187 relevant data.  
56  
57  
58  
59  
60

1  
2  
3 188  
4  
5  
67 189 **RESULTS**  
8  
910 190 **Participant characteristics**  
11

12  
13 191 28 of 54 participants from the intervention group (52%), and 7 of 24 usual care participants (29%)  
14  
15 192 agreed to be interviewed. Most participants who did not take part chose not to reply, but those who  
16  
17 193 did said they did not have anything to report on the trial (n = 3 in usual care). The participants were  
18  
19 194 from 19 different GP Practices. Table 2 shows the sociodemographic and intervention details of the  
20  
21 195 sample.  
22  
23  
24

25 196  
2627  
28 197 Table 2. Sociodemographic and intervention participant data (n=35)  
29

|                                       | Intervention participants | Usual care participants |
|---------------------------------------|---------------------------|-------------------------|
| N                                     | 28                        | 7                       |
| Average duration of interview (range) | 39 (15-67) minutes        | 28 (22-40) minutes      |
| Average age (range)                   | 65 (41-87) years          | 67 (52-77) years        |
| Gender                                | 71% female                | 43% female              |
| Ethnicity                             |                           |                         |
| White                                 | 24                        | 6                       |
| Black African                         | 1                         |                         |
| Pakistani                             | 1                         |                         |
| Other                                 | 2                         | 1                       |
| Education levels                      | 9 No formal education     | 2 No formal education   |

30  
31  
32  
33  
34  
35  
36  
37  
38  
39  
40  
41  
42  
43  
44  
45  
46  
47  
48  
49  
50  
51  
52  
53  
54  
55  
56  
57  
58 10  
59

|                                                   |                     |                    |
|---------------------------------------------------|---------------------|--------------------|
|                                                   | 8 GCSE or A-level   | 3 GCSE or A-level  |
|                                                   | 10 Higher Education | 1 Higher Education |
|                                                   | 1 Other             | 1 Other            |
| Number of weeks into study                        | 23 (10-57) weeks    | 17 (7 to 24) weeks |
| Poorly controlled BP at the time of the interview | 10/28 (36%)         | N/A*               |
| Medication change recommended during the study    | 15/28 (54%)         | N/A                |
| Accessed optional healthy lifestyles session      | 15/28 (54%)         | N/A                |

198 \*As BP self-monitoring was a key component of the intervention, BP readings were available for the  
 199 intervention group throughout the duration of the study but data about BP from the usual care  
 200 group were only available at RCT baseline and follow-up points.

## 201 Themes

202 Table 3 presents seven themes exploring perceptions of burdens and benefits of the HOME BP  
 203 intervention. One meta-theme also emerged concerning how illness and treatment beliefs about  
 204 high BP appeared to influence participants' perceptions about the intervention's burdens and  
 205 benefits, and this is discussed in relation to each theme it applies to. Figure 1 shows how illness and  
 206 treatment perceptions about BP appeared to relate to the sub-themes identified by the thematic  
 207 analysis.

208 Table 3. Themes and sub-themes relating to perceived burdens and benefits of the intervention

| Themes                                                             | Sub-themes                                       | Exemplar participant quote                                                                                                                                                                   |
|--------------------------------------------------------------------|--------------------------------------------------|----------------------------------------------------------------------------------------------------------------------------------------------------------------------------------------------|
| Benefit of reassurance from seeing BP readings                     | Reassurance when BP readings are well-controlled | "I'm so pleased. And my mind is at rest when we go on holidays and all that...I'm alright. I'm alright sort of thing. Yeah, peace of mind" (Intervention p9, well-controlled)                |
|                                                                    | Reassurance from keeping an eye on BP            | "It made me much more aware of what the problem is with the high blood pressure and by monitoring it so regularly, I know exactly where I stand with it" (Intervention p15, well-controlled) |
| Benefit of motivation for lifestyle change from seeing BP readings | Seeing BP readings motivated lifestyle change    | "It is quite interesting to see the effects of what I'm doing on the blood pressure and everything. So, I think that is – it is quite good" (Intervention p18, well-controlled)              |
| Benefit of better                                                  | Perceived health improvements                    | "It helped me to change my medication and then because of change of medication,                                                                                                              |

|                                            |                                                        |                                                                                                                                                                                                                                                                                                                                                 |
|--------------------------------------------|--------------------------------------------------------|-------------------------------------------------------------------------------------------------------------------------------------------------------------------------------------------------------------------------------------------------------------------------------------------------------------------------------------------------|
| health                                     | from medication changes                                | my blood pressure went down. So definitely there is a benefit" (Intervention p16, well-controlled)                                                                                                                                                                                                                                              |
|                                            | Intervention can facilitate management of side effects | "That medication didn't work, in that I was on holiday and my ankles swelled up so much – and my feet and my legs, so much so that I couldn't see my toes. So I stopped taking that medication. Was called back to the GP. And I'm now on a medication that works for me and is managing the blood pressure" (Intervention p7, well-controlled) |
| Burden of worrying about health            | Negative emotional responses to seeing high readings   | "I was actually quite shocked because it was a—a lot higher" (Intervention p6, poorly controlled)                                                                                                                                                                                                                                               |
|                                            | Worrying about medication change affecting health      | "I don't want to get more medication 'cause I'm already on a high dose and I don't want to increase it because it worries me about my kidneys" (Intervention p24, poorly controlled)                                                                                                                                                            |
| Burden of uncertainty from self-monitoring | Uncertainty about whether readings are representative  | "If someone only ever takes it in the morning, and you tend to get those lower readings, are you really getting a true picture of what they're like in the afternoon or the evening?" (Intervention p10, well-controlled)                                                                                                                       |

|                                                                     |                                                         |                                                                                                                                                                                                                                                                                          |
|---------------------------------------------------------------------|---------------------------------------------------------|------------------------------------------------------------------------------------------------------------------------------------------------------------------------------------------------------------------------------------------------------------------------------------------|
|                                                                     | Uncertainty about what to do about high or low readings | "I don't know what's going to happen in respect to that [amber feedback]. Whether I'm going to get a call from my GP, or whether he – so I'm a little bit, like, you know, in the air. I don't really know what's going to happen in that respect" (Intervention p22, poorly controlled) |
| Burden of thinking about making healthy lifestyle changes           | Worry or guilt about not engaging with healthy changes  | "I have looked at it [online healthy lifestyles session]. I wouldn't say I've looked at it seriously, and I need to" (Intervention p4, poorly controlled)                                                                                                                                |
| Burden of the practicalities of adhering to intervention procedures | Burden of fitting self-monitoring into the day          | "I like to get up and have a cup of coffee and I'm thinking 'Well, let's get the blood pressure done first because otherwise I can't do that, you know, for a while afterwards.' So, I've found that quite—quite difficult" (Intervention p5, poorly controlled).                        |

209



1  
2  
3  
4  
5  
6  
7  
8  
9  
10  
11  
12  
13  
14  
15  
16  
17  
18  
19  
20  
21  
22  
23  
24  
25  
26  
27  
28  
29  
30  
31  
32  
33  
34  
35  
36  
37  
38  
39  
40  
41  
42  
43  
44  
45  
46  
47

210

For peer review only

1  
2  
3  
4 211 Insert Figure 1 here  
5  
6

7 212 Benefit of reassurance from seeing BP readings  
8  
9

10 213 *Reassurance when BP readings are well-controlled*  
11  
12

13 214 Seeing well-controlled readings when self-monitoring BP gave participants peace of mind which was  
14

15 215 widely perceived as a benefit of the intervention. People described feeling relieved that their BP  
16

17 216 readings were lower than at the GP Practice, and felt this gave them more insight into what their BP  
18

19 217 was like most of the time.  
20  
21

22 218 “What I do like about it is taking the blood pressure here at home, the readings are lower. And I find  
23

24 219 that quite reassuring that my blood pressure is not always high” (Intervention p11, well-controlled)  
25  
26

27 220 Several usual care participants had decided to use their own BP monitors independently of the  
28

29 221 online intervention, and this group also described feeling reassurance when seeing their BP was  
30

31 222 well-controlled.  
32  
33

34 223 *Reassurance from keeping an eye on BP*  
35  
36

37 224 Most participants liked having an increased focus on their BP through regular monitoring and found  
38

39 225 it interesting to compare their readings over time. However one participant perceived that taking BP  
40

41 226 regularly could encourage too much attention on your health, which was a potential burden of the  
42

43 227 intervention for her (Intervention p28, BP control unknown as did not enter BP readings online). This  
44

45 228 participant had low concern about her BP generally, and was not motivated to engage in self-  
46

47 229 management.  
48  
49

50 230 Even when participants had poorly-controlled readings, many felt a benefit from the intervention as  
51

52 231 it enabled them to regularly check their BP and detect any problems instantly rather than carrying  
53

54 232 on unaware.  
55  
56  
57  
58  
59  
60

1  
2  
3 233 "I think it's helping me to know where my blood pressure stands because it's a regular thing every  
4  
5 234 month" (Intervention p24, poorly-controlled)

6  
7  
8 235 The knowledge that home BP readings were shared with the prescriber reassured participants as  
9  
10 236 they knew that any problems would not only be detected but also dealt with at the time, making  
11  
12 237 them feel well cared for. This contrasted with the perceived burden of managing BP in usual care  
13  
14 238 where some participants felt concerned that their GP did not change their medication when their  
15  
16 239 home readings were too high, or would have liked more regular contact with their Practice to check  
17  
18 240 their BP and medication.

19  
20  
21 241 "It would be nice to have it checked, I guess, you know, every three months or whatever. How—  
22  
23 242 however often. I mean, how do they know that everything is working?" (Usual care p4).

24  
25  
26 243 This shows that although participants in usual care gained reassurance from seeing low readings  
27  
28 244 when they monitored at home, the lack of interaction with the Practice could cause concern when  
29  
30 245 readings were high or when patients did not regularly monitor BP at home of their own accord.

31  
32  
33 246

34  
35  
36 247 Benefit of motivation for lifestyle change from seeing BP readings

37  
38  
39 248 Some participants were motivated to increase their physical activity, engage in stress management  
40  
41 249 activities or healthy eating because they could see this had a positive impact on their BP readings.

42  
43 250 This helped them feel more in control of their BP.

44  
45  
46 251 "By taking the readings regularly and frequently, it gave me more of a feedback straightaway if you  
47  
48 252 like about anything, changes that I did make like a bit of exercise or...practicing relaxation and this  
49  
50 253 sort of thing. So that was quite nice, it was nice to feel that I was more in control of it again"

51  
52 254 (Intervention p20, well-controlled)

1  
2  
3 255 Other participants felt frustrated after making lifestyle changes in the past which had no effect on  
4  
5 256 their BP. This made them feel that lifestyle was ineffective for controlling BP.  
6  
7

8 257 “I’m a completely different person. My diet’s completely different. And my blood pressure remained  
9  
10 258 the same. So I’ve done literally everything you physically possibly can to help yourself, and nothing’s  
11  
12 259 worked” (Intervention p1, well-controlled).  
13  
14

15 260

16  
17  
18 261 Benefit of better health

19  
20  
21 262 *Perceived health improvements from medication changes*  
22  
23

24 263 Many participants felt it was beneficial to change their medication when their readings were too  
25  
26 264 high, and were very pleased when they perceived that a medication change led to lower BP readings  
27  
28 265 because of the positive effect this would have on their health.  
29  
30

31 266 “I’ve found that by having the medication changed up at regular intervals my blood pressure’s  
32  
33 267 improved all the time” (Intervention p15, well-controlled)  
34  
35

36 268 A few participants felt that a medication change had not been effective at lowering their BP which  
37  
38 269 could create doubt about their medication’s effectiveness.  
39  
40

41 270 “It’s been doubled but it hasn’t seemed to lower my blood pressure at all, in fact, it’s at the same  
42  
43 271 levels as it is sort of now, un-medicated. So I just think – I don’t think it’s the right one. You know, I  
44  
45 272 can take the tablet but, actually, I don’t think it’s doing anything”. (Intervention p26, poorly-  
46  
47 273 controlled)  
48  
49

50 274 *Intervention can facilitate management of side effects*  
51  
52

53 275 Most participants did not experience any side effects from having their medication changed. Where  
54  
55 276 side effects did occur, participants tended to perceive this as being a cost of taking medication  
56  
57

1  
2  
3 277 (which was balanced against the benefit of controlling BP), rather than a burden of the intervention  
4  
5 278 itself. They felt that the intervention could help them to be more aware of side effects, to identify  
6  
7 279 alternative medications and to monitor how these affect their health.  
8  
9

10 280 “That [side effect] would have happened, you know, no matter what. That would have been an issue  
11  
12 281 but this has actually highlighted it, sort of, more clearly” (Intervention p5, poorly-controlled)  
13  
14

15 282

16  
17  
18 283 Burden of worrying about health  
19

20  
21 284 *Negative emotional responses to seeing high readings*  
22

23  
24 285 A burden of self-monitoring BP for some people was that seeing high readings could cause worry  
25  
26 286 about health. Participants’ beliefs about their BP control appeared to influence their appraisal of  
27  
28 287 high readings. A few participants believed their BP was well-controlled, a belief which was perhaps  
29  
30 288 reinforced by clinical staff approving their readings previously, and had only joined the study to help  
31  
32 289 with research. These participants tended to feel shocked or annoyed when they received above-  
33  
34 290 target feedback from the intervention as this challenged their beliefs.  
35  
36

37  
38 291 “At one time, I was told to go on medication, further medication, which I must admit I was not very  
39  
40 292 happy about... When I used to go for a check with the nurse, if I’d have had those particular readings,  
41  
42 293 they wouldn’t have been high” (Intervention p17, poorly controlled)  
43  
44

45 294 Others were confused or frustrated by high BP readings when they could not understand why this  
46  
47 295 might have happened.  
48

49  
50 296 “I’m thinking about why my blood pressure has gone up. I can’t think why” (Intervention p25, poorly  
51  
52 297 controlled).  
53

54  
55 298  
56  
57  
58  
59  
60

1  
2  
3 299 Meanwhile people who expected to see high readings were less concerned because they had  
4  
5 300 accepted that high readings were likely.  
6  
7  
8 301 “Just par for the course. It’s what I expect from my blood pressure, really, so, it never worries me”  
9  
10 302 (Intervention p5, poorly controlled)  
11  
12  
13 303 Perceptions about the causes of high BP also influenced how anxious people felt about seeing high  
14  
15 304 readings. Those who felt that high readings held serious implications for their health tended to feel  
16  
17 305 frightened. Some even felt apprehensive *before* self-monitoring in case their readings were out-of-  
18  
19 306 range, as they didn't want to see evidence that their BP was too high or low.  
20  
21  
22 307 “Before I take my blood pressure, I do get stressed. I wouldn't say I get massively stressed because  
23  
24 308 obviously I'm used to doing it now but ... it's just that apprehension and thinking 'Oh, God, I hope it's  
25  
26 309 not too high today. I wonder really what's going on and how serious this is”. (Intervention p26,  
27  
28 310 poorly controlled).  
29  
30  
31 311 Other people were able to dismiss one-off high readings without feeling anxious as they attributed  
32  
33 312 high readings to less threatening explanations such as feeling stressed, not sitting still for long  
34  
35 313 enough, positioning of the cuff, or held a prior expectation of it being normal for BP to fluctuate. In  
36  
37 314 these cases, the high readings had less negative emotional impact as they were not interpreted as  
38  
39 315 indicating a serious underlying health issue.  
40  
41  
42  
43 316 *Worrying about medication change affecting health*  
44  
45  
46 317 Some participants were worried about the effects that changing BP medication could have on their  
47  
48 318 health. Previous experience of side effects, existence of co-morbidities, and concerns about  
49  
50 319 medication dependency or impact on kidneys tended to make participants feel more worried about  
51  
52 320 changing medication.  
53  
54  
55  
56  
57  
58  
59  
60

1  
2  
3 321 Perceptions about the health risk of high BP in terms of stroke and cardiovascular disease tended to  
4  
5 322 affect how burdensome participants perceived a medication change to be. Anxiety about future  
6  
7 323 health could override concerns about medication side effects or dependency as the behaviour was  
8  
9 324 evaluated as beneficial in order to bring BP down, although sometimes participants still experienced  
10  
11 325 conflict between the perceived benefit and burden.

12  
13  
14 326 “The blood pressure has gone down but now my worries have changed from blood pressure to other  
15  
16 327 things. One is actually depending on medicine whole of my life. And secondly impact of medicine  
17  
18 328 on my body like kidneys” (Intervention p16, well-controlled).

19  
20  
21 329

22  
23  
24 330 Burden of uncertainty from self-monitoring

25  
26  
27 331 *Uncertainty about whether readings are representative*

28  
29  
30 332 Whilst some participants were confident making decisions about when to monitor their BP, others  
31  
32 333 were worried about whether their readings were representative, especially when BP was seen to  
33  
34 334 vary at different times of day or after physical activity or drinking coffee. This could lead to doubt  
35  
36 335 about the meaningfulness of self-monitoring and the recommendations of the intervention.

37  
38  
39 336 “I wonder if maybe the time of day I’m doing it, maybe my blood pressure’s always gonna be roughly  
40  
41 337 that. And could it be different during the day, is the sort of thing that does play in my mind a bit”  
42  
43 338 (Intervention p1, well controlled).

44  
45  
46 339 *Uncertainty about what to do about high or low readings*

47  
48  
49  
50 340 Uncertainty could also become a burden after seeing an out-of-range BP reading, as the participant  
51  
52 341 had to decide what to do next. This burden was removed when the prescriber provided quick,  
53  
54 342 personalised feedback to the participant, but when they did not receive any contact from their

1  
2  
3 343 prescriber after an out-of-range reading or felt the prescriber was not available to provide support,  
4  
5 344 this could create a feeling of doubt.  
6  
7

8 345 "I suppose I knew there was nothing to worry about but it's always a bit of a niggle in the back of  
9  
10 346 your mind... even the days she's [the nurse prescriber] at work I can't ring her at work because she  
11  
12 347 may be, you know, doing something else" (Intervention p21, well-controlled)  
13  
14

15 348

16  
17  
18 349 Burden of thinking about making healthy lifestyle changes  
19

20  
21 350 *Worry or guilt about not engaging with healthy changes*  
22  
23

24 351 Several participants felt they would like to lose weight, eat more healthily, or do more physical  
25  
26 352 activity but lacked the motivation or self-efficacy to make these changes, especially if they had other  
27  
28 353 co-morbidities. This could create feelings of guilt or worry about their failure to make healthy  
29  
30 354 changes, which was a burden of the intervention for them.  
31  
32

33 355 "I understand that, obviously, I need to get my blood pressure down because it is very dangerously  
34  
35 356 high, but I just don't know what to do about it, you know?... where I feel fatigued and worn out, I  
36  
37 357 don't feel well enough at the moment to do any exercise" (Intervention p26, poorly controlled)  
38  
39

40 358

41  
42  
43 359 Burden of the practicalities of adhering to intervention procedures  
44

45  
46 360 *Burden of fitting self-monitoring into the day*  
47  
48

49 361 Many participants felt that self-monitoring was easy to fit into their day, and some described this as  
50  
51 362 being easier than going to the GP Surgery to have their BP taken. Those with busy daily lifestyles  
52  
53 363 tended to find it harder to remember to self-monitor, and a burden for some participants was  
54  
55  
56  
57  
58  
59  
60



1  
2  
3 364 deciding how best to fit self-monitoring into their routine given the instructions about not drinking  
4  
5 365 coffee or exercising beforehand.  
6  
7

8 366 The perceived burden of regular self-monitoring seemed to be influenced by the perceived benefit  
9  
10 367 of the behaviour, such that those who felt reassurance from seeing low readings or with high  
11  
12 368 motivation to control BP found it less hassle and easier to remember than those who felt anxious  
13  
14 369 about self-monitoring or had only joined the study to help with research.  
15  
16

17 370 "There was no big deal. It doesn't take long and it's—it's quite nice to sit down and have a relax  
18  
19 371 during the day" (Intervention p8, well-controlled)  
20  
21

22 372  
23  
24  
25  
26  
27  
28  
29  
30  
31  
32  
33  
34  
35  
36  
37  
38  
39  
40  
41  
42  
43  
44  
45  
46  
47  
48  
49  
50  
51  
52  
53  
54  
55  
56  
57  
58  
59  
60

## 373 DISCUSSION

374 This qualitative study has identified diverse perceived burdens and benefits of using a self-  
375 management digital intervention for high BP. In support of the BoT theory<sup>1</sup>, the HOME BP  
376 intervention appeared to reduce the burden on patients to self-manage their condition by improving  
377 access to regular healthcare professional (HCP) support and facilitating better understanding of their  
378 condition, but in some cases there was a burden of worry about health or changing medication. How  
379 much benefit a patient perceived from the intervention compared to burden seemed to be  
380 influenced by the dynamics of the patient-HCP interaction (described as ‘Improving Cooperation’ in  
381 BoT theory) and the patient’s own resources to manage their condition and cope with medication  
382 (described as “Capacity”).

383 Another important factor relating to the burden experienced was personal beliefs about BP and  
384 treatment. Those who recognised that their BP was too high and did not have concerns about side  
385 effects or taking medication appeared to have more positive experiences of the intervention,  
386 perceiving self-monitoring as more worthwhile, and feeling less anxious about seeing high readings  
387 or changing medication. . This is consistent with the necessity-concerns framework<sup>16</sup>. BoT theory  
388 states that people who are better equipped with resources and are more resilient may cope better  
389 with the burden imposed by healthcare<sup>17</sup>, but the importance of an individual’s personal  
390 conceptualisation of their condition in how burdensome they find self-care is not strongly  
391 represented. This beliefs system may be partly encompassed by the “Relational Integration” aspect  
392 of BoT theory, which refers to the extent to which patients trust the tasks they do for healthcare, e.g.  
393 self-monitoring BP, and feel confident in the outcomes of these tasks, e.g. changing medication.  
394 However illness and treatment perceptions<sup>18</sup> are not explicitly covered by the theory and it may be  
395 helpful to consider them as additional factors which might influence the experience of treatment  
396 burden.

397

**398 Implications for measurement of benefit and burden**

399 The present study demonstrates the value of collecting in-depth qualitative data to develop a  
400 detailed understanding of the burden of treatment, and to discover perceptions specific to the  
401 context in which the intervention was implemented. The important psychosocial outcomes  
402 discovered using qualitative research can inform the selection or development of relevant  
403 quantitative measures to capture these factors in further evaluation.

404 Quantitative measures have been developed to appraise the structural aspects of burden of  
405 treatment<sup>19,20</sup>, but these are not intended to assess psychosocial factors such as reassurance, anxiety  
406 or uncertainty which this study suggests can influence the extent to which this work is experienced  
407 subjectively as a burden.

408 Future research could explore how best to capture this. One approach might be to simply ask  
409 participants to quantify the net subjective burden or benefit of interventions. However, it could be  
410 challenging for participants to weigh complex heterogeneous psychosocial outcomes against one  
411 another and decide overall whether an intervention was more burdensome or beneficial. Capturing  
412 the extent to which patients experience positive or negative psychosocial outcomes might better  
413 assess how beneficial or burdensome the intervention was perceived to be. Although this would not  
414 produce a single outcome measure, cost-consequence analysis can be used to inform decision-  
415 making when an intervention has multiple relevant outcomes which cannot be aggregated into one  
416 value<sup>21</sup>. Coast<sup>22</sup> discusses whether a multidimensional approach is more informative for economic  
417 analysis or if a single aggregated value is more pragmatic.

418 Extending the evaluation of outcomes beyond health is in line with the capability approach<sup>23</sup>, which  
419 focuses on broader aspects of subjective well-being which are not assessed by generic measures  
420 such as the EQ-5D<sup>24</sup>. Tools used to capture perceived capability (such as the ICECAP<sup>25</sup>, and ASCOT<sup>26</sup>)

1  
2  
3 421 are gaining support as holistic measures of economic evaluation, but do not assess the more specific  
4  
5 422 psychosocial burdens and benefits of healthcare raised by participants in this study. Process utility  
6  
7 423 emphasises the need to quantitatively measure the value that people attach to healthcare delivery.  
8  
9 424 This approach might be relevant for evaluating how much value people perceive in the process of  
10  
11 425 using digital health interventions and the capability this achieves<sup>27</sup>. It has been argued that process  
12  
13 426 utility measures should also ask about the reasons behind patients' valuations, to better inform the  
14  
15 427 decision-maker<sup>28</sup>. This would help to capture the individual differences found in this study in how  
16  
17 428 people appraise the personal value of a digital intervention, informed by their underlying illness and  
18  
19 429 treatment beliefs.

### 20 21 22 23 430 **Strengths and limitations**

24  
25  
26 431 A strength of the study was that we used relatively open questions formulated by a multi-  
27  
28 432 disciplinary team which enabled us to elicit and explore a wide range of perceived burdens and  
29  
30 433 benefits, some of which were not anticipated at the outset of research. We are aware of the lead  
31  
32 434 researcher's potential influence on the data analysis, which we strived to minimise by transparent  
33  
34 435 memoing of decisions and regular team meetings to discuss the emerging themes. Participants were  
35  
36 436 sent newsletters to describe the findings of the study, but were not invited to provide feedback on  
37  
38 437 the analysis.

39  
40  
41  
42 438 We succeeded in speaking to well and poorly controlled hypertensive participants at different points  
43  
44 439 in the intervention, although the uptake rate from those invited to interviews was not high,  
45  
46 440 particularly in the usual care group. Perhaps unsurprisingly, it was difficult to recruit low engagers in  
47  
48 441 the intervention group, which could have helped reach theoretical saturation. Despite this, there  
49  
50 442 was a considerable range in the level of engagement of the intervention group patients in the study,  
51  
52 443 and a wide range of patient demographics in terms of age, education level and gender.  
53  
54  
55  
56  
57  
58  
59  
60

1  
2  
3 444 Repeated interviews with the same participants may have offered more insight into the dynamic  
4  
5 445 nature of perceived burdens and benefits over time, although more regular conversations about the  
6  
7 446 target behaviour could have influenced participants' BP management behaviour therefore  
8  
9 447 threatening the RCT conclusions. It has been noted that a key issue with process evaluations of  
10  
11 448 interventions is the tendency for intervention content and impact to change over time<sup>29</sup>, such that  
12  
13 449 deciding the optimal point to collect evaluation data is challenging.

14  
15  
16 450 Some of the burdens and benefits described by patients in this study were also found to a lesser  
17  
18 451 extent in the qualitative research undertaken during the development of the HOME BP intervention,  
19  
20 452 such as reassurance from seeing well-controlled readings and knowing that the HCP was aware of  
21  
22 453 your BP readings, as well as the concerns about side effects from medication changes and some  
23  
24 454 evidence of worry about high readings or readings being unreliable due to variability<sup>30</sup>. Others were  
25  
26 455 novel and only arose when participants experienced the full HOME BP intervention during the RCT as  
27  
28 456 opposed to a prototype, for example the perceived health improvements from medication changes.  
29  
30 457 This demonstrates the value of conducting inductive qualitative research to explore users'  
31  
32 458 perspectives at each stage of intervention development and evaluation, in line with the person-  
33  
34 459 based approach<sup>8</sup>.

## 35 36 37 38 39 460 **CONCLUSIONS**

40  
41  
42 461 In the context of this digital intervention, the study shows that participants' appraisal of burdens and  
43  
44 462 benefits appeared to be influenced by both intervention factors, such as BP readings and perceived  
45  
46 463 availability of the healthcare professional, and patient characteristics, such as perceptions of BP  
47  
48 464 control, previous experience of side effects, and co-morbidities. This nuanced evaluation would be  
49  
50 465 lost in a population-level analysis, demonstrating the advantage of a more individualised approach  
51  
52 466 for better understanding participants' perspectives of an intervention and how best to minimise the  
53  
54 467 burden of treatment.

1  
2  
3 468 The study develops the recommendations of McNamee et al<sup>6</sup> that complex digital health  
4  
5 469 interventions warrant a wider perspective for measuring health outcomes, and discusses the  
6  
7 470 implications of capturing broader psychosocial outcomes for Burden of Treatment theory and health  
8  
9 471 economic evaluations.  
10

11  
12 472 The finding that some participants perceived personal benefits from using the intervention  
13  
14 473 demonstrates that the process of healthcare can, in itself, be positive for some people, highlighting  
15  
16 474 the importance of capturing transient short-term benefits to take these into account as well as the  
17  
18 475 burden of self-management.  
19

20  
21 476  
22

23  
24 477  
25

26 478  
27  
28  
29  
30  
31  
32  
33  
34  
35  
36  
37  
38  
39  
40  
41  
42  
43  
44  
45  
46  
47  
48  
49  
50  
51  
52  
53  
54  
55  
56  
57  
58  
59  
60

1  
2  
3 479 **CONTRIBUTORS**  
4  
5

6 480 KM recruited participants, conducted interviews, analysed data, and wrote manuscript. LD & KB  
7  
8 481 contributed to study design and data analysis. KB and RB developed online intervention. PL & RJM  
9  
10 482 contributed to intervention development and interpretation of themes. CM & JR contributed to  
11  
12 483 theoretical and methodological implications of the study findings. LY contributed to study design,  
13  
14 484 data collection, data analysis, and interpretation.  
15

16  
17 485 All authors contributed to the manuscript preparation and provided final approval of the version to  
18  
19 486 be published.  
20

21  
22  
23 487•

24  
25 488• **FUNDING**  
26

27  
28 489 This independent research was funded by the National Institute for Health Research (NIHR)  
29  
30 490 Programme Grants for Applied Research Programme (Grant Reference Number RP-PG-1211-20001).  
31  
32 491 The views expressed are those of the author(s) and not necessarily those of the NHS, the NIHR, or  
33  
34 492 the Department of Health. RJM is funded by an NIHR Professorship (NIHR-RP-R2-12-015) and the  
35  
36 493 NIHR Oxford CLAHRC.  
37

38  
39  
40 494• **COMPETING INTERESTS**  
41

42  
43 495 RJM has received BP monitors for research purposes from Omron and Lloyds Pharmacies.  
44  
45

46 496• **ETHICS APPROVAL**  
47

48  
49 497• This qualitative process study was embedded in the Home BP trial and approved by the University of  
50  
51 498 Southampton and NHS Hampshire A Research Ethics committees (REC Reference 15/SC/0082).  
52

53  
54 499 **DATA SHARING STATEMENT**  
55  
56  
57  
58  
59  
60

1  
2  
3 500 Requests for data sharing can be sent to the corresponding author. Full transcripts of interviews are  
4  
5 501 not available to protect participants' anonymity.  
6  
7  
8 502  
9  
10  
11  
12  
13  
14  
15  
16  
17  
18  
19  
20  
21  
22  
23  
24  
25  
26  
27  
28  
29  
30  
31  
32  
33  
34  
35  
36  
37  
38  
39  
40  
41  
42  
43  
44  
45  
46  
47  
48  
49  
50  
51  
52  
53  
54  
55  
56  
57  
58  
59  
60

For peer review only



## 503 REFERENCES

- 504 1. May CR, Eton DT, Boehmer K, et al. Rethinking the patient: using Burden of  
505 Treatment Theory to understand the changing dynamics of illness. *BMC*  
506 *Health Serv Res* 2014;**14**(1):281.
- 507 2. Eton DT, de Oliveira DR, Egginton JS, et al. Building a measurement framework of  
508 burden of treatment in complex patients with chronic conditions: a  
509 qualitative study. *Patient related outcome measures* 2012;**3**:39.
- 510 3. Gallacher K, May CR, Montori VM, et al. Understanding patients' experiences of  
511 treatment burden in chronic heart failure using normalization process theory.  
512 *The Annals of Family Medicine* 2011;**9**(3):235–43.
- 513 4. Sanders GD, Neumann PJ, Basu A, et al. Recommendations for conduct,  
514 methodological practices, and reporting of cost–effectiveness analyses:  
515 second panel on cost–effectiveness in health and medicine. *JAMA*  
516 2016;**316**(10):1093–103.
- 517 5. Ioannidis JP, Garber AM. Individualized cost–effectiveness analysis. *PLoS Med*  
518 2011;**8**(7):e1001058.
- 519 6. McNamee P, Murray E, Kelly MP, et al. Designing and undertaking a health  
520 economics study of digital health interventions. *Am J Prev Med*  
521 2016;**51**(5):852–60.
- 522 7. Band R, Morton K, Stuart B, et al. Home and Online Management and Evaluation  
523 of Blood Pressure (HOME BP) digital intervention for self–management of  
524 uncontrolled, essential hypertension: a protocol for the randomised  
525 controlled HOME BP trial. *BMJ open* 2016;**6**(11):e012684.
- 526 8. Yardley L, Morrison L, Bradbury K, et al. The person–based approach to  
527 intervention development: application to digital health–related behavior  
528 change interventions. *J Med Internet Res* 2015;**17**(1).
- 529 9. Tong A, Sainsbury P, Craig J. Consolidated criteria for reporting qualitative  
530 research (COREQ): a 32–item checklist for interviews and focus groups. *Int J*  
531 *Qual Health Care* 2007;**19**(6):349–57.
- 532 10. Braun V, Clarke V. Using thematic analysis in psychology. *Qualitative research in*  
533 *psychology* 2006;**3**(2):77–101.
- 534 11. Joffe H, Yardley L. Content and thematic analysis. *Research methods for clinical*  
535 *and health psychology* 2004;**56**:68.

- 1  
2  
3 536 12. Strauss A, Corbin JM. *Grounded theory in practice*: Sage, 1997.  
4  
5 537 13. Charmaz K. *Constructing grounded theory*. Sage, 2014.  
6  
7 538 14. NVivo qualitative data analysis Software [program], 2012.  
8  
9 539 15. Rogers PJ, Stevens K, Boymal J. Qualitative cost-benefit evaluation of complex,  
10 540 emergent programs. *Eval Program Plann* 2009;**32**(1):83–90.  
11  
12 541 16. Horne R, Weinman J. Patients' beliefs about prescribed medicines and their role  
13 542 in adherence to treatment in chronic physical illness. *J Psychosom Res*  
14 543 1999;**47**(6):555–67.  
15  
16 544 17. Mair FS, May CR. Thinking about the burden of treatment. *Br Med J*  
17 545 2014;**349**:g6680.  
18  
19 546 18. Leventhal H, Diefenbach M, Leventhal EA. Illness cognition: using common  
20 547 sense to understand treatment adherence and affect cognition interactions.  
21 548 *Cognit Ther Res* 1992;**16**(2):143–63.  
22  
23 549 19. Eton DT, Yost KJ, Lai J-s, et al. Development and validation of the Patient  
24 550 Experience with Treatment and Self-management (PETS): a patient-reported  
25 551 measure of treatment burden. *Quality of life research: an international*  
26 552 *journal of quality of life aspects of treatment, care and rehabilitation*  
27 553 2017;**26**(2):489–503.  
28  
29 554 20. Tran V-T, Harrington M, Montori VM, et al. Adaptation and validation of the  
30 555 Treatment Burden Questionnaire (TBQ) in English using an internet platform.  
31 556 *BMC Med* 2014;**12**(1):109.  
32  
33 557 21. NICE. Incorporating economic evaluation. 2014.  
34 558 [https://www.nice.org.uk/process/pmg20/chapter/incorporating-economic-](https://www.nice.org.uk/process/pmg20/chapter/incorporating-economic-evaluation.12th)  
35 559 [evaluation.12th](https://www.nice.org.uk/process/pmg20/chapter/incorporating-economic-evaluation.12th) July 2017  
36  
37 560 22. Coast J, Kinghorn P, Mitchell P. The development of capability measures in  
38 561 health economics: opportunities, challenges and progress. *The Patient-*  
39 562 *Patient-Centered Outcomes Research* 2015;**8**(2):119–26.  
40  
41 563 23. Nussbaum M, Sen A. *The quality of life*: Clarendon Press – Oxford, 1993.  
42  
43 564 24. Brazier J, Ratcliffe J, Saloman J, et al. *Measuring and valuing health benefits for*  
44 565 *economic evaluation*: OXFORD university press, 2017.  
45  
46 566 25. Al-Janabi H, Flynn TN, Coast J. Development of a self-report measure of  
47 567 capability wellbeing for adults: the ICECAP-A. *Qual Life Res* 2012;**21**(1):167–  
48 568 76.  
49  
50  
51  
52  
53  
54  
55  
56  
57  
58  
59  
60

- 1  
2  
3 569 26. Netten A, Burge P, Malley J, et al. Outcomes of social care for adults: developing  
4 570 a preference-weighted measure. *Health Technol Assess* 2012;**16**(16).  
5  
6  
7 571 27. Ryan M, Kinghorn P, Entwistle VA, et al. Valuing patients' experiences of  
8 572 healthcare processes: Towards broader applications of existing methods. *Soc*  
9 573 *Sci Med* 2014;**106**:194–203.  
10  
11 574 28. Donaldson C, Shackley P. Does “process utility” exist? A case study of  
12 575 willingness to pay for laparoscopic cholecystectomy. *Soc Sci Med*  
13 576 1997;**44**(5):699–707.  
14  
15  
16 577 29. Moore GF, Audrey S, Barker M, et al. Process evaluation of complex  
17 578 interventions: Medical Research Council guidance. *BMJ* 2015;**350**:h1258.  
18  
19  
20 579 30. Bradbury K, Morton K, Grist R, et al. Using the Person-Based Approach to  
21 580 optimise a digital intervention for the management of hypertension. *In*  
22 581 *submission* 2017.  
23  
24 582  
25  
26  
27  
28  
29  
30  
31  
32  
33  
34  
35  
36  
37  
38  
39  
40  
41  
42  
43  
44  
45  
46  
47  
48  
49  
50  
51  
52  
53  
54  
55  
56  
57  
58  
59  
60

1  
2  
3  
4  
5  
6  
7  
8  
9  
10  
11  
12  
13  
14  
15  
16  
17  
18  
19  
20  
21  
22  
23  
24  
25  
26  
27  
28  
29  
30  
31  
32  
33  
34  
35  
36  
37  
38  
39  
40  
41  
42  
43  
44  
45  
46  
47

For peer review only

1  
2  
3  
4  
5  
6  
7  
8  
9  
10  
11  
12  
13  
14  
15  
16  
17  
18  
19  
20  
21  
22  
23  
24  
25  
26  
27  
28  
29  
30  
31  
32  
33  
34  
35  
36  
37  
38  
39  
40  
41  
42  
43  
44  
45  
46  
47  
48  
49  
50  
51  
52  
53  
54  
55  
56  
57  
58  
59  
60

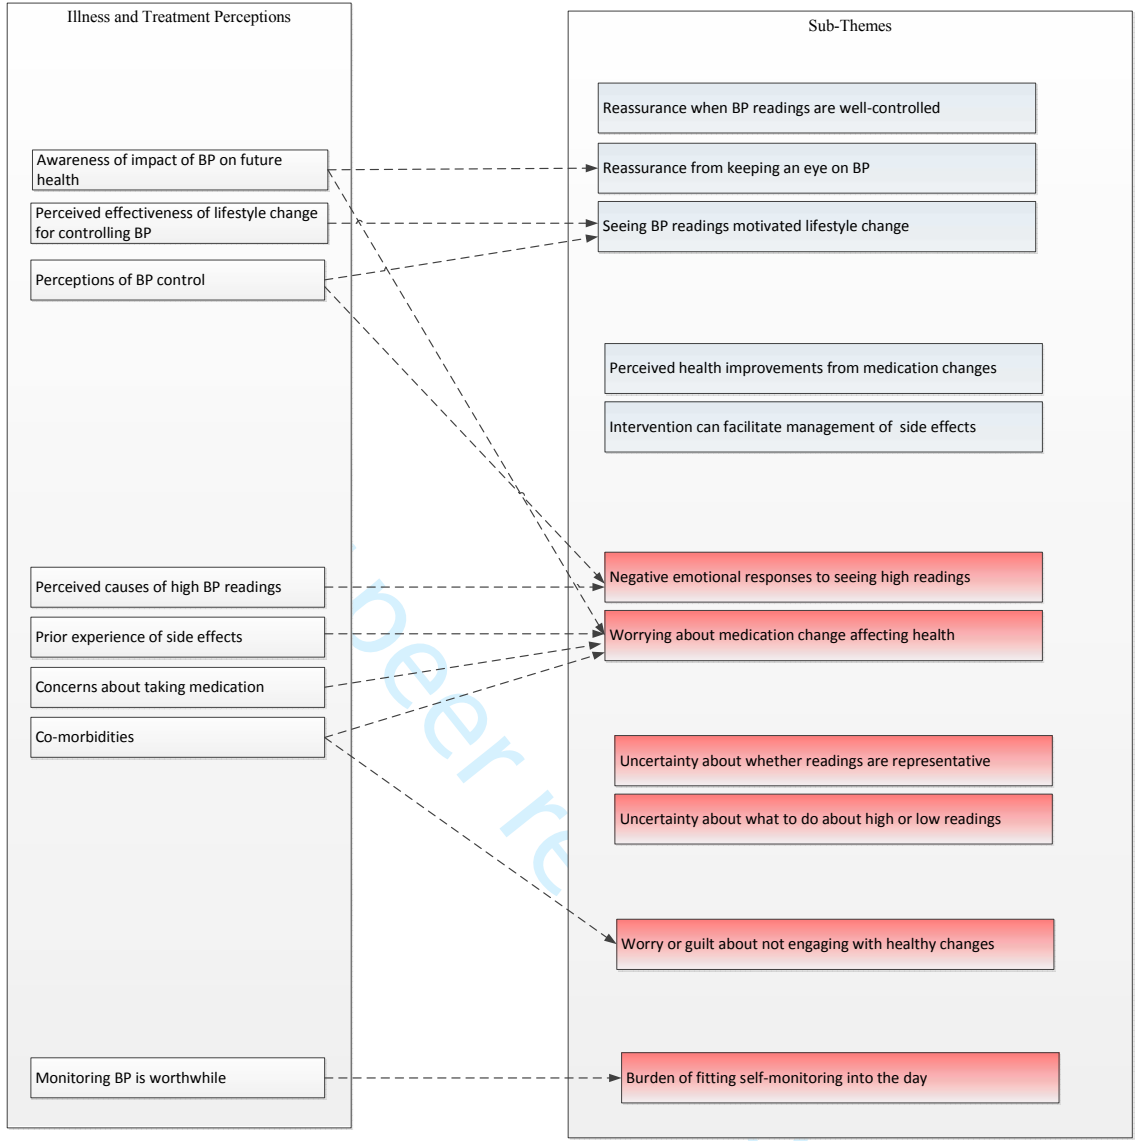

Figure 1 Possible influences of illness and treatment beliefs on perceived burdens and benefits of the intervention

1  
2  
3  
4 **Additional File 1. Interview schedules for intervention and usual care group**  
5

6 Intervention group interview schedule  
7

8  
9 **Opening questions**  
10

11 Can you tell me about what it is like for you to have high blood pressure?  
12

13  
14  
15 How did you feel when you were first told you had high blood pressure?  
16

17  
18  
19 Can you tell me why you decided to sign up for the Home BP study?  
20

21  
22 I'm really interested in hearing about your experiences of using HOME BP, can you tell me all about  
23 it?  
24  
25

26  
27 Can you tell me about anything that you have liked about the HOME BP study so far?  
28

29  
30 Can you tell me about anything that you have disliked?  
31

32  
33 Can you tell me about any advantages of using HOME BP?  
34

35  
36 And can you tell me about any disadvantages of using HOME BP?  
37

38  
39 How do you feel about your high blood pressure now?  
40

41  
42 Do you think you would choose to keep on using the HOME BP programme if it was still available  
43 after a year?  
44

45 Why/ Why not?  
46  
47

48  
49 Would you recommend the HOME BP programme to other people with high blood pressure?  
50

51  
52  
53  
54 **Self-monitoring**  
55

1  
2  
3 Experiences of monitoring:  
4

5 Can you tell me about what it was like when you were learning how to use your BP monitor at home?  
6  
7

8  
9 Can you tell me about the first time you used your BP monitor at home in the study?  
10  
11

12  
13  
14 Can you tell me about what it has been like to monitor your blood pressure yourself?  
15

16  
17  
18 How did it make you feel?  
19  
20

21  
22 Had you ever monitored your own blood pressure before you took part in the HOME BP study?  
23

24 *If yes:*

25  
26 Can you tell me a bit more about this?  
27

28 Can you tell me whether you've noticed any changes in how you monitor your blood  
29  
30 pressure since you've started the HOME BP programme?  
31  
32

33  
34  
35 *All:* Can you tell me about any concerns that you have about monitoring your blood pressure?  
36  
37

38  
39  
40 Adherence to the monitoring schedule:  
41

42 The HOME BP programme reminds you to monitor your blood pressure for 7 days every 4 weeks.  
43

44 Can you tell me about what it has been like for you to try and monitor your blood pressure for 7 days  
45  
46 every 4 weeks?  
47

48  
49 Can you tell me about the time of day you have been monitoring your blood pressure so far?  
50  
51

52 How do you feel about the instructions HOME BP gives about when to monitor?  
53  
54

55 Was there anything that helped you to monitor your own blood pressure?  
56  
57  
58  
59  
60

1  
2  
3 Was there anything that made it harder to monitor your own blood pressure?  
4

5  
6 Can you tell me about any time when you had to skip your blood pressure monitoring or change  
7  
8 when you did it in the day?  
9

10  
11 Can you tell me how you found it entering your readings on the HOME BP programme?  
12

### 13 Feedback messages

14  
15  
16 Remember after you enter your readings on HOME BP, you see a message which says 'your readings  
17  
18 were amber, or green'? What did you think about these messages?  
19

20  
21 Can you tell me about how you felt when you saw a message about your blood pressure readings on  
22  
23 HOME BP?  
24

25  
26 How did you feel about monitoring your own blood pressure after reading that message?  
27

28  
29 Did you have any very high or very low readings (red/blue) when you were monitoring in the HOME  
30  
31 BP study? How did you feel?  
32

### 33 **2. Medication change**

34  
35 Can you tell me about what it's like for you taking medication for your high blood pressure?  
36  
37

38  
39 Have you been recommended to make a medication change during the HOME BP study?  
40  
41

42  
43 If yes:  
44

45  
46 How did you feel about making a change to your medication when HOME BP recommended  
47  
48 it?  
49

50  
51 Did you make this change to your medication?  
52

53  
54 ***If they chose to make a change:***  
55



1  
2  
3 Can you tell me about what it was like to make a medication change in the HOME BP study?  
4

5  
6 Can you tell me about how the medication change came about?  
7

8  
9 How did you get on with your new medication?  
10

11  
12 How would you feel if HOME BP recommended a medication change for you now?  
13

14 ***If they chose not to make a change –***  
15

16  
17 Can you tell me about why you decided not to change your medication?  
18

19  
20 How would you feel if HOME BP recommended another medication change for you now?  
21

22  
23 *If no:*  
24

25  
26 *If patient has **not** been recommended a med change:* How do you feel about changing your  
27  
28 medication if your blood pressure stayed too high for too long?  
29

30  
31 Can you tell me about any concerns that you have about doing this?  
32

33  
34 *All:*  
35

36  
37 How did you feel about making changes to your medication before you took part in HOME BP?  
38

39 **3. HCP support**  
40

41  
42 Can you tell me about the contact you have had with your GP or nurse so far in the HOME BP study?  
43

44  
45 Can you tell me about how you have found the support from your GP or nurse while you were taking  
46  
47 part in the HOME BP study?  
48

49  
50 Can you tell me what you thought about receiving emails from your nurse about HOME BP?  
51

52  
53 If needed, follow-up questions:  
54

55  
56 Have you seen your GP about your blood pressure since the start of the study?  
57

1  
2  
3 And what about appointments with the nurse?  
4

5  
6 Can you tell me about how you have found the emails from HOME BP?  
7

8  
9 **4. Healthy changes**

10  
11 Can you tell me about anything else that you do to try and manage your high blood pressure?  
12

13  
14 There is an option on the HOME BP programme to look at online sessions about making healthy  
15  
16 changes that can help lower your blood pressure, I wonder if you remember if you have seen it?  
17

18  
19 *If no:*

20  
21  
22 Can you tell about how you might feel about making healthy changes to help lower your blood  
23  
24 pressure?  
25

26  
27 *If yes:*

28  
29  
30 Can you tell me about how you found the session on healthy changes?  
31

32  
33 How did you feel about making the healthy changes this session talked about?  
34

35  
36 *If they chose a change:* Can you tell me about what made you choose this/these ones?  
37

38  
39 How did you find the online session about xxxx (cutting down on salt/alcohol/eating a healthier  
40  
41 diet/doing more physical activity/ losing weight)?  
42

43  
44 Can you tell me about what it was like for you trying out this healthy change?  
45

46  
47 How did making a healthy change like this make you feel?  
48

49  
50 *Or if they didn't choose any:* Can you tell me about why you didn't want to choose a healthy change?  
51

52  
53 *All:* Can you tell me about any concerns that you have about making a new healthy change?  
54  
55  
56  
57  
58  
59  
60

1  
2  
3 Is there anything else you would like to tell me about the HOME BP study that we haven't already  
4  
5 talked about?  
6  
7  
8  
9

10 Usual care group interview schedule

11  
12  
13 General questions about BP

14  
15  
16 Can you tell me about what it is like for you to have high blood pressure?  
17

18  
19 How did you feel when you were first told you had high blood pressure?  
20

21  
22 Can you talk me through what (if anything) you currently do to manage/control your high blood  
23  
24 pressure?  
25

26  
27 Can you tell me about how your GP and practice nurse are involved in helping you to control  
28  
29 your high blood pressure?  
30

31  
32 How do you feel about monitoring your own blood pressure at home?  
33

34  
35 If they already monitor – can you tell me a bit more about this?  
36

37  
38 Can you tell me about what it's like for you taking medication for your high blood pressure?  
39

40  
41 Can you tell me how you feel about your GP making changes to your blood pressure medication?  
42  
43  
44  
45

46 HOME BP study experience

47  
48  
49  
50  
51 Can you tell me why you signed up for the Home BP study?  
52  
53  
54  
55  
56  
57  
58  
59  
60

1  
2  
3 Can you tell me all about what it has been like for you being in the HOME BP study in the usual  
4  
5 care group?  
6

7  
8 At the start of the HOME BP study, you had a baseline appointment with a nurse at your GP  
9  
10 Practice – can you tell me about that?  
11

12  
13 How did you find it using the HOME BP programme to fill in your questionnaires online at the  
14  
15 start of the study?  
16

17  
18 After you had completed your questionnaires, did you have an appointment with your GP to  
19  
20 check your blood pressure medication? Can you tell me about this?  
21

22  
23  
24  
25  
26 HCP support  
27

28  
29 Can you tell me about the contact you have had with your GP or nurse so far in the HOME BP  
30  
31 study?  
32

33  
34 Can you tell me about how you have found the support from your GP or nurse while you were  
35  
36 taking part in the HOME BP study?  
37

## Consolidated criteria for reporting qualitative studies (COREQ): 32-item checklist

Developed from:

Tong A, Sainsbury P, Craig J. Consolidated criteria for reporting qualitative research (COREQ): a 32-item checklist for interviews and focus groups. *International Journal for Quality in Health Care*. 2007. Volume 19, Number 6: pp. 349 – 357

**YOU MUST PROVIDE A RESPONSE FOR ALL ITEMS. ENTER N/A IF NOT APPLICABLE**

| No. Item                                       | Guide questions/description                                                                                                                              | Reported on Page # |
|------------------------------------------------|----------------------------------------------------------------------------------------------------------------------------------------------------------|--------------------|
| <b>Domain 1: Research team and reflexivity</b> |                                                                                                                                                          |                    |
| <i>Personal Characteristics</i>                |                                                                                                                                                          |                    |
| 1. Interviewer/facilitator                     | Which author/s conducted the interview or focus group?                                                                                                   | Page 9             |
| 2. Credentials                                 | What were the researcher's credentials?<br>E.g. PhD, MD                                                                                                  | Page 9             |
| 3. Occupation                                  | What was their occupation at the time of the study?                                                                                                      | Page 9             |
| 4. Gender                                      | Was the researcher male or female?                                                                                                                       | Page 9             |
| 5. Experience and training                     | What experience or training did the researcher have?                                                                                                     | Page 9             |
| <i>Relationship with participants</i>          |                                                                                                                                                          |                    |
| 6. Relationship established                    | Was a relationship established prior to study commencement?                                                                                              | N/A                |
| 7. Participant knowledge of the interviewer    | What did the participants know about the researcher? e.g. personal goals, reasons for doing the research                                                 | N/A                |
| 8. Interviewer characteristics                 | What characteristics were reported about the interviewer/facilitator? e.g. Bias, assumptions, reasons and interests in the research topic                | Page 9             |
| <b>Domain 2: study design</b>                  |                                                                                                                                                          |                    |
| <i>Theoretical framework</i>                   |                                                                                                                                                          |                    |
| 9. Methodological orientation and Theory       | What methodological orientation was stated to underpin the study? e.g. grounded theory, discourse analysis, ethnography, phenomenology, content analysis | Page 9             |
| <i>Participant selection</i>                   |                                                                                                                                                          |                    |
| 10. Sampling                                   | How were participants selected? e.g. purposive, convenience, consecutive, snowball                                                                       | Page 8             |
| 11. Method of approach                         | How were participants approached? e.g. face-to-face, telephone, mail, email                                                                              | Page 8             |

|                                        |                                                                                                                                 |                    |
|----------------------------------------|---------------------------------------------------------------------------------------------------------------------------------|--------------------|
| 12. Sample size                        | How many participants were in the study?                                                                                        | Page 10            |
| 13. Non-participation                  | How many people refused to participate or dropped out? Reasons?                                                                 | Page 10            |
| <i>Setting</i>                         |                                                                                                                                 |                    |
| 14. Setting of data collection         | Where was the data collected? e.g. home, clinic, workplace                                                                      | Page 8             |
| 15. Presence of non-participants       | Was anyone else present besides the participants and researchers?                                                               | N/A                |
| 16. Description of sample              | What are the important characteristics of the sample? e.g. demographic data, date                                               | Page 10            |
| <i>Data collection</i>                 |                                                                                                                                 |                    |
| 17. Interview guide                    | Were questions, prompts, guides provided by the authors? Was it pilot tested?                                                   | Page 8             |
| 18. Repeat interviews                  | Were repeat inter views carried out? If yes, how many?                                                                          | N/A                |
| 19. Audio/visual recording             | Did the research use audio or visual recording to collect the data?                                                             | Page 9             |
| 20. Field notes                        | Were field notes made during and/or after the inter view or focus group?                                                        | Page 9             |
| 21. Duration                           | What was the duration of the inter views or focus group?                                                                        | Page 10            |
| 22. Data saturation                    | Was data saturation discussed?                                                                                                  | Page 8             |
| 23. Transcripts returned               | Were transcripts returned to participants for comment and/or correction?                                                        | N/A                |
| <b>Domain 3: analysis and findings</b> |                                                                                                                                 |                    |
| <i>Data analysis</i>                   |                                                                                                                                 |                    |
| 24. Number of data coders              | How many data coders coded the data?                                                                                            | Page 9             |
| 25. Description of the coding tree     | Did authors provide a description of the coding tree?                                                                           | Page 12            |
| 26. Derivation of themes               | Were themes identified in advance or derived from the data?                                                                     | Page 9             |
| 27. Software                           | What software, if applicable, was used to manage the data?                                                                      | Page 9             |
| 28. Participant checking               | Did participants provide feedback on the findings?                                                                              | Page 25            |
| <i>Reporting</i>                       |                                                                                                                                 |                    |
| 29. Quotations presented               | Were participant quotations presented to illustrate the themes/findings? Was each quotation identified? e.g. participant number | Throughout results |
| 30. Data and findings consistent       | Was there consistency between the data presented and the findings?                                                              | Yes                |
| 31. Clarity of major themes            | Were major themes clearly presented in the findings?                                                                            | Yes                |
| 32. Clarity of minor themes            | Is there a description of diverse cases or discussion of minor themes?                                                          | Yes                |

1  
2  
3  
4 **Once you have completed this checklist, please save a copy and upload it as part**  
5 **of your submission. When requested to do so as part of the upload process,**  
6 **please select the file type: *Checklist*. You will NOT be able to proceed with**  
7 **submission unless the checklist has been uploaded. Please DO NOT include this**  
8 **checklist as part of the main manuscript document. It must be uploaded as a**  
9 **separate file.**  
10  
11  
12  
13  
14  
15  
16  
17  
18  
19  
20  
21  
22  
23  
24  
25  
26  
27  
28  
29  
30  
31  
32  
33  
34  
35  
36  
37  
38  
39  
40  
41  
42  
43  
44  
45  
46  
47  
48  
49  
50  
51  
52  
53  
54  
55  
56  
57  
58  
59  
60

For peer review only

# BMJ Open

## A qualitative process study to explore the perceived burdens and benefits of a digital intervention for self-managing high blood pressure in Primary Care.

|                                 |                                                                                                                                                                                                                                                                                                                                                                                                                                                                                                                                                                                                                                         |
|---------------------------------|-----------------------------------------------------------------------------------------------------------------------------------------------------------------------------------------------------------------------------------------------------------------------------------------------------------------------------------------------------------------------------------------------------------------------------------------------------------------------------------------------------------------------------------------------------------------------------------------------------------------------------------------|
| Journal:                        | <i>BMJ Open</i>                                                                                                                                                                                                                                                                                                                                                                                                                                                                                                                                                                                                                         |
| Manuscript ID                   | bmjopen-2017-020843.R1                                                                                                                                                                                                                                                                                                                                                                                                                                                                                                                                                                                                                  |
| Article Type:                   | Research                                                                                                                                                                                                                                                                                                                                                                                                                                                                                                                                                                                                                                |
| Date Submitted by the Author:   | 01-Feb-2018                                                                                                                                                                                                                                                                                                                                                                                                                                                                                                                                                                                                                             |
| Complete List of Authors:       | Morton, Katherine; University of Southampton, Psychology<br>Dennison, Laura; University of Southampton, Psychology<br>Bradbury, Katherine; University of Southampton, Psychology<br>Band, Rebecca; University of Southampton, Psychology<br>May, Carl; University of Southampton, Faculty of Health Sciences<br>Raftery, James; Southampton University, School of Medicine<br>Little, Paul; University of Southampton, Primary Care and Population Science<br>McManus, Richard; University of Oxford, Dept of Primary Care Health Sciences<br>Yardley, Lucy ; University of Oxford, Nuffield Department of Primary Health Care Sciences |
| <b>Primary Subject Heading</b>: | Qualitative research                                                                                                                                                                                                                                                                                                                                                                                                                                                                                                                                                                                                                    |
| Secondary Subject Heading:      | Cardiovascular medicine, Health services research, Public health                                                                                                                                                                                                                                                                                                                                                                                                                                                                                                                                                                        |
| Keywords:                       | Self-management, digital intervention, qualitative, treatment burden                                                                                                                                                                                                                                                                                                                                                                                                                                                                                                                                                                    |
|                                 |                                                                                                                                                                                                                                                                                                                                                                                                                                                                                                                                                                                                                                         |

SCHOLARONE™  
Manuscripts



1  
2  
3  
4  
5  
6 **1 Title page**  
7  
8  
9

10 **2 A qualitative process study to explore the perceived burdens and benefits of a digital**  
11  
12 **3 intervention for self-managing high blood pressure in Primary Care.**  
13  
14

15 4 Kate Morton<sup>a\*</sup>, Laura Dennison<sup>a</sup>, Katherine Bradbury<sup>a</sup>, Rebecca Band<sup>a</sup>, Carl May<sup>b</sup>, James Raftery<sup>c</sup>,  
16  
17 5 Paul Little<sup>d</sup>, Richard J. McManus<sup>e</sup>, & Lucy Yardley<sup>a</sup>  
18  
19

20 6 a. Academic unit of psychology, University of Southampton, Southampton, UK  
21

22 7 b. Faculty of Health Sciences, University of Southampton, Southampton, UK  
23

24 8 c. Faculty of Medicine, University of Southampton, Southampton, UK  
25

26 9 d. Primary Care Research, University of Southampton, Southampton, UK  
27

28  
29 10 e. Nuffield Department of Primary Care Health Sciences, University of Oxford, Oxford, UK  
30  
31

32 11  
33  
34  
35

36 12 \*Corresponding author: [ksm1r13@soton.ac.uk](mailto:ksm1r13@soton.ac.uk); 02380 592234  
37  
38

39 13 Room 3063, B44, University of Southampton, Southampton, SO17 1BJ  
40  
41

42 14  
43  
44

45 15 Word count 5047  
46  
47

48 16  
49  
50

51 17  
52  
53

54 18  
55  
56  
57  
58  
59  
60

1  
2  
3 19  
4  
5  
67 20 **ABSTRACT**

8  
9  
10  
11 21 **Objectives:** Digital interventions can change patients' experiences of managing their health, either  
12  
13 22 creating additional burden or improving their experience of healthcare. This qualitative study aimed  
14  
15 23 to explore perceived burdens and benefits for patients using a digital self-management intervention  
16  
17 24 for reducing high blood pressure. A secondary aim was to further our understanding of how best to  
18  
19 25 capture burdens and benefits when evaluating health interventions.

20  
21  
22 26 **Design:** Inductive qualitative process study nested in a randomised controlled trial.

23  
24  
25 27 **Setting:** Primary Care in the UK

26  
27  
28 28 **Participants:** 35 participants taking antihypertensive medication and with uncontrolled blood  
29  
30 29 pressure at baseline participated in semi-structured telephone interviews.

31  
32  
33 30 **Intervention:** Digital self-management intervention to support blood pressure self-monitoring and  
34  
35 31 medication change when recommended by the healthcare professional.

36  
37  
38 32 **Analysis:** Data were analysed using inductive thematic analysis with techniques from grounded  
39  
40 33 theory.

41  
42  
43 34 **Results:** Seven themes were developed which reflected perceived burdens and benefits of using the  
44  
45 35 intervention, including worry about health, uncertainty about self-monitoring, and reassurance. The  
46  
47 36 analysis showed how beliefs about their condition and treatment appeared to influence participants'  
48  
49 37 appraisal of the value of the intervention. This suggested that considering illness and treatment  
50  
51 38 perceptions in Burden of Treatment theory could further our understanding of how individuals  
52  
53 39 appraise the personal costs and benefits of self-managing their health.  
54  
55  
56  
57  
58  
59  
60

1  
2  
3 40 **Conclusions:** Patients' appraisal of the burden or benefit of using a complex self-management  
4  
5 41 intervention seemed to be influenced by experiences within the intervention (such as perceived  
6  
7 42 availability of support) and beliefs about their condition and treatment (such as perceived control  
8  
9 43 and risk of side effects). Developing our ability to adequately capture these salient burdens and  
10  
11 44 benefits for patients could help enhance evaluation of self-management interventions in the future.  
12  
13 45 Many participants perceived important benefits from using the intervention, highlighting the need  
14  
15 46 for theory to recognise that engaging in self-management can include positive as well as negative  
16  
17 47 aspects.  
18  
19  
20 48

21  
22  
23 49 Trial registration: ISRCTN13790648. Registered 14 May 2015.  
24

25 50 **Keywords:** Self-management; digital intervention; qualitative; treatment burden  
26  
27

28 51 **Strengths and limitations of this study:**

- 29 52 ❖ The exploratory, open approach to data collection enabled us to capture whichever benefits or  
30  
31 53 burdens were most salient to the participants.  
32  
33 54 ❖ We only interviewed participants at one point in time, so were unable to gain an understanding  
34  
35 55 of dynamic changes in perceived benefits or burdens over time.  
36  
37 56 ❖ Both well and poorly controlled hypertensive patients took part in the interviews, but it was  
38  
39 57 difficult to recruit low users of the intervention which could limit the generalisability of the  
40  
41 58 findings.  
42  
43 59 ❖ The asymptomatic nature of hypertension and the unique medication change pathway means  
44  
45 60 that these findings may not be generalisable across conditions.  
46  
47  
48  
49  
50  
51  
52  
53  
54  
55  
56  
57  
58  
59  
60  
61  
62

## 63 BACKGROUND

64 The work involved in looking after one's health when living with a chronic condition can include  
65 complex tasks such as organising and adhering to treatment regimes, interacting with healthcare  
66 professionals (HCPs), regular monitoring of health indicators, and making health-related decisions,  
67 all of which can accumulate into a considerable burden<sup>1</sup>. Digital self-management interventions are  
68 often developed to improve health outcomes, but these interventions could also either increase or  
69 minimise the burden of the healthcare process for patients. Developing our understanding of the  
70 burdens of self-management can help to better optimise the delivery of healthcare to improve  
71 adherence and well-being<sup>1-3</sup>. Burden of Treatment (BoT) theory provides a mechanism for  
72 understanding these experiences in the context of patients' personal capacity to cope, with  
73 emphasis on the role of wider healthcare systems and social networks available to the patient<sup>1</sup>.

74 Health economic evaluations also focus on understanding the impact of healthcare on patients,  
75 seeking to weigh up the resources used against the health outcomes in order to better inform  
76 decision-making. Recent guidelines for economic evaluations in health and medicine recommend  
77 adopting a societal perspective such that all relevant outcomes are evaluated, rather than focusing  
78 only on formal healthcare costs<sup>4</sup>. In particular, personal costs such as time spent in self-care should  
79 be included. Consequently, BoT theory and health economic evaluations share an interest in  
80 adequately capturing the wider burdens or personal costs of engaging with healthcare. For  
81 consistency in terminology in this paper, negative outcomes/personal costs of healthcare will be  
82 referred to as 'burdens'.

83 BoT theory considers patients' time as a resource that is used by the healthcare system, while health  
84 economic evaluation counts time as an 'opportunity cost' whereby the patient 'spends' time that  
85 could have been spent on something other than healthcare. However, subjective experiences of  
86 time spent on digital interventions may be varied and complex. Heterogeneity in the relative value  
87 placed on the outcomes of the intervention<sup>5</sup> may mean that for some participants the time spent

1  
2  
3 88 engaging with elements of an intervention is not perceived as a burden but rather as a benefit,  
4  
5 89 either because it is interesting, pleasant or meaningful in and of itself or because of the positive  
6  
7 90 outcomes it can lead to. In other words, some people may actually like engaging with healthcare.  
8  
9 91 The value of exploring the personal benefits of intervention participation has not received as much  
10  
11 92 focus as understanding the costs, such as treatment burden. McNamee et al.<sup>6</sup> proposed that the  
12  
13 93 health research guidelines for economic analysis may need to be adjusted for digital health  
14  
15 94 interventions to ensure we can fully capture the heterogeneous costs and benefits arising when  
16  
17 95 complex interventions are implemented in complex systems.  
18  
19  
20  
21 96 To further our understanding of how patients perceive benefits and burdens when using digital  
22  
23 97 health interventions, we carried out a qualitative process study<sup>7</sup>. The digital HOME BP intervention  
24  
25 98 was developed based on best practice recommendations to help improve hypertension in poorly  
26  
27 99 controlled patients by facilitating self-monitoring of blood pressure (BP) at home and prompting  
28  
29 100 appropriate intensification of medication by HCPs<sup>8</sup>. This intervention could help to minimise the  
30  
31 101 treatment burden of hypertension by providing an online healthcare system in which HCPs have  
32  
33 102 sight of patients' home readings, streamlining the process for finding the most effective medication  
34  
35 103 without the need for attending the GP surgery. However, HOME BP is a complex, interactive multi-  
36  
37 104 component intervention, which creates potential diversity in the perceived burden and benefits for  
38  
39 105 participants using it. The contexts in which the intervention is embedded may also be diverse, and  
40  
41 106 factors such as individual differences in patients' health status, beliefs about medication and risks of  
42  
43 107 high BP, availability of time and resources, and access to support may influence how the  
44  
45 108 intervention is perceived and valued. The HOME BP intervention was developed using the person-  
46  
47 109 based approach<sup>9</sup> which emphasises the importance of understanding participants' unique  
48  
49 110 perspectives and different situations when developing and implementing digital interventions.  
50  
51 111 Adopting a more granular approach to the evaluation of benefit and burden is consistent with the  
52  
53  
54  
55  
56  
57  
58  
59  
60

1  
2  
3 112 person-based approach, and with the BoT approach of fully understanding the participants'  
4  
5 113 perspective.  
6  
7

8 114 The present study aimed to explore the perceived burden and benefits of using a digital health  
9  
10 115 intervention for self-managing BP using qualitative process interviews with intervention and usual  
11  
12 116 care participants taking part in a randomised controlled trial (RCT). This paper seeks to interpret the  
13  
14 117 implications for optimising the capture of perceived costs and benefits in health economic  
15  
16 118 evaluations and evaluating the burden of treatment.  
17  
18

19  
20 119

## 21 22 23 120 **METHODS**

### 24 25 26 27 121 **Design**

28  
29  
30 122 A qualitative process study embedded in the HOME BP trial<sup>8</sup> was approved by the University of  
31  
32 123 Southampton and NHS Research Ethics committees. The COREQ checklist (Consolidated criteria for  
33  
34 124 reporting qualitative studies) was used to ensure comprehensive reporting of the study<sup>10</sup>  
35  
36 125 (supplementary file 1).  
37  
38

39  
40 126

### 41 42 43 127 **Intervention**

44  
45  
46 128 The HOME BP programme supports participants to self-manage their high BP, primarily via home  
47  
48 129 self-monitoring of BP and making changes to dose/drug type when recommended by the HCP.  
49  
50 130 Lifestyle change modules are also available, but optional as the key target behaviours for the  
51  
52 131 intervention were self-monitoring and medication change adherence<sup>8,11</sup>. Participants using HOME  
53  
54 132 BP were supported by a 'prescriber' (GP or nurse prescriber responsible for changing medication)  
55  
56  
57  
58  
59  
60

1  
2  
3 133 and a 'supporter' (nurse or healthcare assistant who supported participants in self-monitoring and  
4  
5 134 choosing lifestyle changes).  
6  
7  
8 135 Participants were invited to use the online programme by their GP and were randomised to usual  
9  
10 136 care or intervention after completing baseline measures online. Those randomised to the  
11  
12 137 intervention group completed two online training sessions which sought to overcome concerns  
13  
14 138 about variability in readings and changing medication. Participants were encouraged to monitor  
15  
16 139 their BP in the mornings, but the programme allowed flexibility as it was most important that people  
17  
18 140 found a time of day that suited them to monitor their BP. Both intervention and usual care  
19  
20 141 participants were followed-up at 6 and 12 months post-randomisation.  
21  
22  
23 142 Table 1 describes the HOME BP intervention in more detail.  
24  
25  
26 143 Table 1 HOME BP Intervention Characteristics

| Target behaviour   | Description                                                                                                                                                                                                                                                                                                                                                                                                                                                                                                             |
|--------------------|-------------------------------------------------------------------------------------------------------------------------------------------------------------------------------------------------------------------------------------------------------------------------------------------------------------------------------------------------------------------------------------------------------------------------------------------------------------------------------------------------------------------------|
| Self-monitoring BP | Participants monitored their BP at home for 7 days every 4 weeks. After 7 days, they entered their BP readings on the HOME BP website and received instant automated feedback using a traffic light system. If BP was very high (red) or very low (blue), they were told to contact their GP surgery. If BP was above target (amber), they were told their prescriber would contact them about a medication change. If BP was on target (green), they were congratulated and asked to monitor their BP again next time. |
| Medication change  | The prescriber planned three potential medication changes with the participant at the start of the study. HOME BP informed prescribers by email when a patient's home BP readings were above-target and they could implement a pre-                                                                                                                                                                                                                                                                                     |

|                            |                                                                                                                                                                                                                                                                                                                                                                                                                                                                                                                                      |
|----------------------------|--------------------------------------------------------------------------------------------------------------------------------------------------------------------------------------------------------------------------------------------------------------------------------------------------------------------------------------------------------------------------------------------------------------------------------------------------------------------------------------------------------------------------------------|
|                            | planned change without needing to see the participant for an appointment.                                                                                                                                                                                                                                                                                                                                                                                                                                                            |
| Optional lifestyle changes | At nine weeks after randomisation, participants had the option of choosing an online session to support lifestyle change to help control their BP, specifically weight management, salt reduction, healthy diet, physical activity, or alcohol reduction. Participants were alerted by email when this became available, and saw an option to view the healthy lifestyles session each time they logged on to HOME BP. The online lifestyle change sessions could be started at any time during the 12-month trial, from nine weeks. |

144

145 **Participants**

146 Patients were eligible to take part in the HOME BP trial if they had uncontrolled hypertension (mean  
 147 BP reading of 140/90 mm Hg or more at baseline taken at the GP Surgery using a validated electronic  
 148 automated sphygmomanometer (BP TRU BPM 200)) managed in Primary Care, were prescribed 1-3  
 149 antihypertensive medications at baseline, and aged over 18 (full inclusion and exclusion criteria are  
 150 listed in the protocol<sup>8</sup>).

151 Both intervention and usual care participants were invited to take part in interviews as we felt that  
 152 obtaining an understanding of managing BP in usual care would aid interpretation of the perceived  
 153 burden and benefits of the intervention. We aimed to speak to participants at a range of time-points  
 154 during the 12-month trial from 10 weeks onwards as this gave participants the opportunity to  
 155 become familiar with HOME BP. No new intervention content was introduced after the lifestyles  
 156 sessions became available at nine weeks.



1  
2  
3 157 **Recruitment and interview procedure**  
4  
5

6 158 A sub-sample of RCT participants were invited by email to provide feedback on their experiences of  
7  
8 159 managing their BP (n=78, of 622 patients in the RCT). Informed consent was taken by post or online,  
9  
10 160 depending on participant preference. Recruitment was initially opportunistic, but subsequently a  
11  
12 161 purposive approach was adopted to target younger participants, low engagers, and those with  
13  
14 162 recent uncontrolled self-monitored BP readings, informed by the concurrent analysis. Recruitment  
15  
16 163 was stopped once the researchers agreed that data saturation had been reached and no new  
17  
18 164 burdens or benefits were arising.

19  
20  
21 165 Semi-structured interview schedules were co-developed by experts in health psychology (KM, KB, RB,  
22  
23 166 LY, LD), health economics (JR) and sociology (CM). Open, inductive questions were carefully selected  
24  
25 167 to elicit data about the burden and benefits of BP management perceived as most salient by the  
26  
27 168 participants (see Supplementary File 2 for interview schedules). The interviews were conducted by  
28  
29 169 telephone to minimise the burden on participants, except in one case where the participant asked to  
30  
31 170 meet face-to-face due to struggling with hearing on the telephone. The interviews took place  
32  
33 171 between February 2016 and February 2017. Each participant was given a £10 gift voucher to thank  
34  
35 172 them for their time.

36  
37  
38  
39 173 All interviews were conducted by KM (MSc, BSc. termed "the researcher"), a female PhD candidate  
40  
41 174 in Health Psychology who was also employed as a research assistant. Each interview was audio-  
42  
43 175 recorded, and the researcher also took notes and completed a self-reflection log afterwards to  
44  
45 176 record any emerging thoughts on the data. Audio-recordings were transcribed verbatim and checked  
46  
47 177 thoroughly by the researcher.

48  
49  
50  
51 178 **Analysis**  
52  
53

54 179 The analysis was an iterative process led by KM, supported by frequent discussion of emerging  
55  
56 180 themes with LY and LD (who have extensive experience in qualitative research) along with input  
57  
58

1  
2  
3 1 81 regarding health economic and sociological perspectives (JR and CM). Inductive thematic analysis  
4  
5 1 82 methods were used<sup>12 13</sup> with techniques from grounded theory such as memoing, constant  
6  
7 1 83 comparison, and diagramming to enhance our understanding and facilitate the development of  
8  
9 1 84 higher themes<sup>14 15</sup>. Data collection and analysis ran concurrently to enable purposive sampling based  
10  
11 1 85 on analytic insights. Thorough line-by-line coding was undertaken in NVivo 10<sup>16</sup>, and a coding  
12  
13 1 86 manual was developed which evolved as more data were collected and coded. The emerging codes  
14  
15 1 87 were constantly checked against the raw data to ensure the analysis was driven by the participants'  
16  
17 1 88 own language and experiences.

18  
19  
20 1 89 All data relating to burdens and benefits of managing BP were analysed. We also coded factors that  
21  
22 1 90 appeared to influence perceptions of burdens and benefits to facilitate an in-depth understanding of  
23  
24 1 91 how participants appraised the intervention's value. A broad and open definition was adopted  
25  
26 1 92 whereby benefits and burdens were defined as positive and negative outcomes or experiences of  
27  
28 1 93 engaging in the intervention<sup>17</sup>, in order to facilitate a comprehensive representation of all potentially  
29  
30 1 94 relevant data.

31  
32  
33  
34 1 95

## 35 36 37 1 96 **RESULTS**

### 38 39 40 41 1 97 **Participant characteristics**

42  
43  
44 1 98 In the intervention group, 28 of 54 invited participants agreed to be interviewed (52%). In the usual  
45  
46 1 99 care group, 7 of 24 invited participants agreed (29%). Most participants who did not take part chose  
47  
48 2 00 not to reply, but those who did said they did not have anything to report on the trial (n = 3 in usual  
49  
50 2 01 care). The participants were from 19 different GP surgeries. Table 2 shows the sociodemographic  
51  
52 2 02 and intervention details of the sample.

53  
54  
55  
56 2 03

204 Table 2. Sociodemographic and intervention participant data (n=35)

|                                                   | Intervention participants | Usual care participants |
|---------------------------------------------------|---------------------------|-------------------------|
| N                                                 | 28                        | 7                       |
| Average duration of interview (range)             | 39 (15-67) minutes        | 28 (22-40) minutes      |
| Average age (range)                               | 65 (41-87) years          | 67 (52-77) years        |
| Gender                                            | 71% female                | 43% female              |
| Ethnicity                                         |                           |                         |
| White                                             | 24                        | 6                       |
| Black African                                     | 1                         |                         |
| Pakistani                                         | 1                         |                         |
| Other                                             | 2                         | 1                       |
| Education levels                                  | 9 No formal education     | 2 No formal education   |
|                                                   | 8 GCSE or A-level         | 3 GCSE or A-level       |
|                                                   | 10 Higher Education       | 1 Higher Education      |
|                                                   | 1 Other                   | 1 Other                 |
| Number of weeks since randomisation               | 23 (10-57) weeks          | 17 (7 to 24) weeks      |
| Poorly controlled BP at the time of the interview | 10/28 (36%)               | N/A*                    |
| Medication change recommended during the study    | 15/28 (54%)               | N/A                     |
| Accessed optional healthy lifestyles session      | 15/28 (54%)               | N/A                     |

1  
2  
3 205 \*As BP self-monitoring was a key component of the intervention, BP readings were available for the  
4  
5 206 intervention group throughout the duration of the study but data about BP from the usual care  
6  
7 207 group were only available at RCT baseline and follow-up points.  
8  
9

## 10 208 **Themes**

11  
12  
13  
14 209 Table 3 presents seven themes exploring perceived burdens and benefits of the HOME BP  
15  
16 210 intervention. One meta-theme also emerged concerning how illness and treatment beliefs about  
17  
18 211 high BP appeared to influence participants' perceptions about the intervention's burdens and  
19  
20 212 benefits, and this is discussed in relation to each theme it applies to. Figure 1 shows how illness and  
21  
22 213 treatment perceptions about BP appeared to relate to the sub-themes identified by the thematic  
23  
24 214 analysis.  
25  
26

27 215

28  
29  
30 216 Where quotes are included, participants are referred to as 'p' followed by a number. Study group  
31  
32 217 (intervention or usual care) is also included to help understand the quotes in context.  
33  
34  
35  
36  
37  
38  
39  
40  
41  
42  
43  
44  
45  
46  
47  
48  
49  
50  
51  
52  
53  
54  
55  
56  
57  
58  
59  
60

1  
2  
3  
4  
5  
6  
7  
8  
9  
10  
11  
12  
13  
14  
15  
16  
17  
18  
19  
20  
21  
22  
23  
24  
25  
26  
27  
28  
29  
30  
31  
32  
33  
34  
35  
36  
37  
38  
39  
40  
41  
42  
43  
44  
45  
46  
47

218 Table 3. Themes and sub-themes relating to perceived burdens and benefits of the intervention

| Themes                                                             | Sub-themes                                       | Exemplar participant quote                                                                                                                                                                   |
|--------------------------------------------------------------------|--------------------------------------------------|----------------------------------------------------------------------------------------------------------------------------------------------------------------------------------------------|
| Benefit of reassurance from seeing BP readings                     | Reassurance when BP readings are well-controlled | "I'm so pleased. And my mind is at rest when we go on holidays and all that...I'm alright. I'm alright sort of thing. Yeah, peace of mind" (Intervention p9, well-controlled)                |
|                                                                    | Reassurance from keeping an eye on BP            | "It made me much more aware of what the problem is with the high blood pressure and by monitoring it so regularly, I know exactly where I stand with it" (Intervention p15, well-controlled) |
| Benefit of motivation for lifestyle change from seeing BP readings | Seeing BP readings motivated lifestyle change    | "It is quite interesting to see the effects of what I'm doing on the blood pressure and everything. So, I think that is – it is quite good" (Intervention p18, well-controlled)              |
| Benefit of better                                                  | Perceived health improvements                    | "It helped me to change my medication and then because of change of medication,                                                                                                              |

|                                            |                                                        |                                                                                                                                                                                                                                                                                                                                                 |
|--------------------------------------------|--------------------------------------------------------|-------------------------------------------------------------------------------------------------------------------------------------------------------------------------------------------------------------------------------------------------------------------------------------------------------------------------------------------------|
| health                                     | from medication changes                                | my blood pressure went down. So definitely there is a benefit" (Intervention p16, well-controlled)                                                                                                                                                                                                                                              |
|                                            | Intervention can facilitate management of side effects | "That medication didn't work, in that I was on holiday and my ankles swelled up so much – and my feet and my legs, so much so that I couldn't see my toes. So I stopped taking that medication. Was called back to the GP. And I'm now on a medication that works for me and is managing the blood pressure" (Intervention p7, well-controlled) |
| Burden of worrying about health            | Negative emotional responses to seeing high readings   | "I was actually quite shocked because it was a—a lot higher" (Intervention p6, poorly controlled)                                                                                                                                                                                                                                               |
|                                            | Worrying about medication change affecting health      | "I don't want to get more medication 'cause I'm already on a high dose and I don't want to increase it because it worries me about my kidneys" (Intervention p24, poorly controlled)                                                                                                                                                            |
| Burden of uncertainty from self-monitoring | Uncertainty about whether readings are representative  | "If someone only ever takes it in the morning, and you tend to get those lower readings, are you really getting a true picture of what they're like in the afternoon or the evening?" (Intervention p10, well-controlled)                                                                                                                       |

1  
2  
3  
4  
5  
6  
7  
8  
9  
10  
11  
12  
13  
14  
15  
16  
17  
18  
19  
20  
21  
22  
23  
24  
25  
26  
27  
28  
29  
30  
31  
32  
33  
34  
35  
36  
37  
38  
39  
40  
41  
42  
43  
44  
45  
46  
47

|                                                                            |                                                                |                                                                                                                                                                                                                                                                                                 |
|----------------------------------------------------------------------------|----------------------------------------------------------------|-------------------------------------------------------------------------------------------------------------------------------------------------------------------------------------------------------------------------------------------------------------------------------------------------|
|                                                                            | <p>Uncertainty about what to do about high or low readings</p> | <p>"I don't know what's going to happen in respect to that [amber feedback]. Whether I'm going to get a call from my GP, or whether he – so I'm a little bit, like, you know, in the air. I don't really know what's going to happen in that respect" (Intervention p22, poorly controlled)</p> |
| <p>Burden of thinking about making healthy lifestyle changes</p>           | <p>Worry or guilt about not engaging with healthy changes</p>  | <p>"I have looked at it [online healthy lifestyles session]. I wouldn't say I've looked at it seriously, and I need to" (Intervention p4, poorly controlled)</p>                                                                                                                                |
| <p>Burden of the practicalities of adhering to intervention procedures</p> | <p>Burden of fitting self-monitoring into the day</p>          | <p>"I like to get up and have a cup of coffee and I'm thinking 'Well, let's get the blood pressure done first because otherwise I can't do that, you know, for a while afterwards.' So, I've found that quite—quite difficult" (Intervention p5, poorly controlled).</p>                        |

219

1  
2  
3  
4  
5  
6  
7  
8  
9  
10  
11  
12  
13  
14  
15  
16  
17  
18  
19  
20  
21  
22  
23  
24  
25  
26  
27  
28  
29  
30  
31  
32  
33  
34  
35  
36  
37  
38  
39  
40  
41  
42  
43  
44  
45  
46  
47

220

For peer review only



1  
2  
3  
4 221 Insert Figure 1 here  
5  
6

7 222 Benefit of reassurance from seeing BP readings  
8  
9

10 223 *Reassurance when BP readings are well-controlled*  
11  
12

13 224 Seeing well-controlled readings when self-monitoring BP gave participants peace of mind which was  
14

15 225 widely perceived as a benefit of the intervention. People described feeling relieved that their BP  
16

17 226 readings were lower than at the GP surgery, and felt this gave them more insight into what their BP  
18

19 227 was like most of the time.  
20  
21

22 228 “What I do like about it is taking the blood pressure here at home, the readings are lower. And I find  
23

24 229 that quite reassuring that my blood pressure is not always high” (Intervention p11, well-controlled)  
25  
26

27 230 Several usual care participants had decided to use their own BP monitors, and this group also  
28

29 231 described feeling reassurance when seeing their BP was well-controlled.  
30  
31

32 232 *Reassurance from keeping an eye on BP*  
33  
34

35 233 Most participants liked having an increased focus on their BP through regular monitoring and found  
36

37 234 it interesting to compare their readings over time. However one participant perceived that taking BP  
38

39 235 regularly could encourage too much attention on your health, which was a potential burden of the  
40

41 236 intervention for her (Intervention p28, BP control unknown as did not enter BP readings on HOME  
42

43 237 BP). This participant had low concern about her BP generally, and was not motivated to engage in  
44

45 238 self-management.  
46  
47

48 239 Even when participants had poorly-controlled readings, many felt a benefit from the intervention as  
49

50 240 it enabled them to regularly check their BP and detect any problems instantly rather than carrying  
51

52 241 on unaware.  
53  
54  
55  
56  
57  
58  
59  
60

1  
2  
3 242 “I think it’s helping me to know where my blood pressure stands because it’s a regular thing every  
4  
5 243 month” (Intervention p24, poorly-controlled)  
6  
7

8 244 The knowledge that home readings were shared with the prescriber reassured participants as they  
9  
10 245 knew that any problems would not only be detected but also dealt with at the time, making them  
11  
12 246 feel well cared for. This contrasted with the perceived burden of managing BP in usual care where  
13  
14 247 some participants felt concerned that their GP did not change their medication when their home  
15  
16 248 readings were too high, or would have liked more regular contact with their Practice to check their  
17  
18 249 BP and medication.  
19  
20

21 250 “It would be nice to have it checked, I guess, you know, every three months or whatever. How—  
22  
23 251 however often. I mean, how do they know that everything is working?” (Usual care p4).  
24  
25

26 252 This shows that although participants in usual care gained reassurance from seeing low readings  
27  
28 253 when they monitored at home, the lack of interaction with the Practice could cause concern when  
29  
30 254 readings were high or when patients did not regularly monitor BP at home of their own accord.  
31  
32

33  
34 255  
35

36 256 Benefit of motivation for lifestyle change from seeing BP readings  
37  
38

39 257 Some participants were motivated to increase their physical activity, engage in stress management  
40  
41 258 activities or healthy eating because they could see this had a positive impact on their BP readings.  
42  
43

44 259 This helped them feel more in control of their BP.  
45

46 260 “By taking the readings regularly and frequently, it gave me more of a feedback straightaway if you  
47  
48 261 like about anything, changes that I did make like a bit of exercise or...practicing relaxation and this  
49  
50 262 sort of thing. So that was quite nice, it was nice to feel that I was more in control of it again”  
51  
52

53 263 (Intervention p20, well-controlled)  
54  
55  
56  
57  
58  
59  
60

1  
2  
3 264 Other participants felt frustrated after making lifestyle changes in the past which had no effect on  
4  
5 265 their BP. This made them feel that lifestyle was ineffective for controlling BP.  
6  
7  
8 266 “I’m a completely different person. My diet’s completely different. And my blood pressure remained  
9  
10 267 the same. So I’ve done literally everything you physically possibly can to help yourself, and nothing’s  
11  
12 268 worked” (Intervention p1, well-controlled).  
13

14  
15 269

16  
17  
18 270 Benefit of better health

19  
20  
21 271 *Perceived health improvements from medication changes*  
22

23  
24 272 Many participants felt it was beneficial to change their medication when their readings were too  
25  
26 273 high, and were very pleased when they perceived that a medication change led to lower BP readings  
27  
28 274 because of the positive effect this would have on their health.  
29

30  
31 275 “I’ve found that by having the medication changed up at regular intervals my blood pressure’s  
32  
33 276 improved all the time” (Intervention p15, well-controlled)  
34

35  
36 277 A few participants felt that a medication change had not been effective at lowering their BP which  
37  
38 278 could create doubt about their medication’s effectiveness.  
39

40  
41 279 “It’s been doubled but it hasn’t seemed to lower my blood pressure at all, in fact, it’s at the same  
42  
43 280 levels as it is sort of now, un-medicated. So I just think – I don’t think it’s the right one. You know, I  
44  
45 281 can take the tablet but, actually, I don’t think it’s doing anything”. (Intervention p26, poorly-  
46  
47 282 controlled)  
48

49  
50 283 *Intervention can facilitate management of side effects*  
51

52  
53 284 Most participants did not experience any side effects from having their medication changed. Where  
54  
55 285 side effects did occur, participants tended to perceive this as being a cost of taking medication  
56  
57

1  
2  
3 286 (which was balanced against the benefit of controlling BP), rather than a burden of the intervention  
4  
5 287 itself. They felt that the intervention could help them to be more aware of side effects, to identify  
6  
7 288 alternative medications and to monitor how these affect their health.  
8  
9

10 289 “That [side effect] would have happened, you know, no matter what. That would have been an issue  
11  
12 290 but this has actually highlighted it, sort of, more clearly” (Intervention p5, poorly-controlled)  
13  
14

15 291

16  
17  
18 292 Burden of worrying about health  
19

20  
21 293 *Negative emotional responses to seeing high readings*  
22

23  
24 294 A burden of self-monitoring BP for some people was that seeing high readings could cause worry  
25  
26 295 about health. Participants’ beliefs about their BP control appeared to influence their appraisal of  
27  
28 296 high readings. A few participants believed their BP was well-controlled, a belief which was perhaps  
29  
30 297 reinforced by clinical staff approving their readings previously, and had only joined the study to help  
31  
32 298 with research. These participants tended to feel shocked or annoyed when they received above-  
33  
34 299 target feedback from the intervention as this challenged their beliefs.  
35  
36

37  
38 300 “At one time, I was told to go on medication, further medication, which I must admit I was not very  
39  
40 301 happy about... When I used to go for a check with the nurse, if I’d have had those particular readings,  
41  
42 302 they wouldn’t have been high” (Intervention p17, poorly controlled)  
43  
44

45 303 Others were confused or frustrated by high BP readings when they could not understand why this  
46  
47 304 might have happened.  
48

49  
50 305 “I’m thinking about why my blood pressure has gone up. I can’t think why” (Intervention p25, poorly  
51  
52 306 controlled).  
53

54  
55 307  
56  
57  
58  
59  
60

1  
2  
3 308 Meanwhile people who expected to see high readings were less concerned because they had  
4  
5 309 accepted that high readings were likely.  
6  
7  
8 310 “Just par for the course. It’s what I expect from my blood pressure, really, so, it never worries me”  
9  
10 311 (Intervention p5, poorly controlled)  
11  
12  
13 312 Perceptions about the causes of high BP also influenced how anxious people felt about seeing high  
14  
15 313 readings. Those who felt that high readings held serious implications for their health tended to feel  
16  
17 314 frightened. Some even felt apprehensive *before* self-monitoring in case their readings were out-of-  
18  
19 315 range, as they didn't want to see evidence that their BP was too high or low.  
20  
21  
22 316 “Before I take my blood pressure, I do get stressed. I wouldn't say I get massively stressed because  
23  
24 317 obviously I'm used to doing it now but ... it's just that apprehension and thinking 'Oh, God, I hope it's  
25  
26 318 not too high today. I wonder really what's going on and how serious this is”. (Intervention p26,  
27  
28 319 poorly controlled).  
29  
30  
31 320 Other people were able to dismiss one-off high readings without feeling anxious as they attributed  
32  
33 321 high readings to less threatening explanations such as feeling stressed, not sitting still for long  
34  
35 322 enough, positioning of the cuff, or held a prior expectation of it being normal for BP to fluctuate. In  
36  
37 323 these cases, the high readings had less negative emotional impact as they were not interpreted as  
38  
39 324 indicating a serious underlying health issue.  
40  
41  
42  
43 325 *Worrying about medication change affecting health*  
44  
45  
46 326 Some participants were worried about the effects that changing BP medication could have on their  
47  
48 327 health. Previous experience of side effects, existence of co-morbidities, and concerns about  
49  
50 328 medication dependency or impact on kidneys tended to make participants feel more worried about  
51  
52 329 changing medication.  
53  
54  
55  
56  
57  
58  
59  
60

1  
2  
3 330 Perceptions about the health risk of high BP in terms of stroke and cardiovascular disease tended to  
4  
5 331 affect how burdensome participants perceived a medication change to be. Anxiety about future  
6  
7 332 health could override concerns about medication side effects or dependency as the behaviour was  
8  
9 333 evaluated as beneficial in order to bring BP down, although sometimes participants still experienced  
10  
11 334 conflict between the perceived benefit and burden.

12  
13  
14 335 “The blood pressure has gone down but now my worries have changed from blood pressure to other  
15  
16 336 things. One is actually depending on medicine whole of my life. And secondly impact of medicine  
17  
18 337 on my body like kidneys” (Intervention p16, well-controlled).

19  
20  
21 338

22  
23  
24 339 Burden of uncertainty from self-monitoring

25  
26  
27 340 *Uncertainty about whether readings are representative*

28  
29  
30 341 Whilst some participants were confident making decisions about when to monitor their BP, others  
31  
32 342 were worried about whether their readings were representative, especially when BP was seen to  
33  
34 343 vary at different times of day or after physical activity or drinking coffee. This could lead to doubt  
35  
36 344 about the meaningfulness of self-monitoring and the recommendations of the intervention.

37  
38  
39 345 “I wonder if maybe the time of day I’m doing it, maybe my blood pressure’s always gonna be roughly  
40  
41 346 that. And could it be different during the day, is the sort of thing that does play in my mind a bit”  
42  
43 347 (Intervention p1, well controlled).

44  
45  
46 348 *Uncertainty about what to do about high or low readings*

47  
48  
49 349 Uncertainty could also become a burden after seeing an out-of-range BP reading, as the participant  
50  
51 350 had to decide what to do next. This burden was removed when the prescriber provided quick,  
52  
53 351 personalised feedback to the participant, but when they did not receive any contact from their

1  
2  
3 352 prescriber or felt the prescriber was not available to provide support, this could create a feeling of  
4  
5 353 doubt.

6  
7  
8 354 "I suppose I knew there was nothing to worry about but it's always a bit of a niggle in the back of  
9  
10 355 your mind... even the days she's [the nurse prescriber] at work I can't ring her at work because she  
11  
12 356 may be, you know, doing something else" (Intervention p21, well-controlled)

13  
14  
15 357

16  
17  
18 358 Burden of thinking about making healthy lifestyle changes

19  
20  
21 359 *Worry or guilt about not engaging with healthy changes*

22  
23  
24 360 Several participants felt they would like to lose weight, eat more healthily, or do more physical  
25  
26 361 activity but lacked the motivation or self-efficacy to make these changes, especially if they had other  
27  
28 362 co-morbidities. This could create feelings of guilt or worry about their failure to make healthy  
29  
30 363 changes, which was a burden of the intervention for them.

31  
32  
33 364 "I understand that, obviously, I need to get my blood pressure down because it is very dangerously  
34  
35 365 high, but I just don't know what to do about it, you know?... where I feel fatigued and worn out, I  
36  
37 366 don't feel well enough at the moment to do any exercise" (Intervention p26, poorly controlled)

38  
39  
40 367

41  
42  
43 368 Burden of the practicalities of adhering to intervention procedures

44  
45  
46 369 *Burden of fitting self-monitoring into the day*

47  
48  
49 370 Many participants felt that self-monitoring was easy to fit into their day, and some described this as  
50  
51 371 being easier than going to the GP Surgery to have their BP taken. Those with busy daily lifestyles  
52  
53 372 tended to find it harder to remember to self-monitor, and a burden for some participants was

1  
2  
3 373 deciding how best to fit self-monitoring into their routine given the instructions about not drinking  
4  
5 374 coffee or exercising beforehand.  
6  
7  
8 375 The perceived burden of regular self-monitoring seemed to be mitigated by the perceived benefit of  
9  
10 376 the behaviour, such that those who felt reassurance from seeing low readings or with high  
11  
12 377 motivation to control BP found it less hassle and easier to remember than those who felt anxious  
13  
14 378 about self-monitoring or had only joined the study to help with research.  
15  
16  
17 379 "There was no big deal. It doesn't take long and it's—it's quite nice to sit down and have a relax  
18  
19 380 during the day" (Intervention p8, well-controlled)  
20  
21  
22 381



## 382 DISCUSSION

383 This qualitative study has identified diverse perceived burdens and benefits of using a self-  
384 management digital intervention for high BP. In support of the BoT theory<sup>1</sup>, the HOME BP  
385 intervention appeared to reduce the burden on patients to self-manage their condition by improving  
386 access to regular HCP support and facilitating better understanding of their condition, but in some  
387 cases there was a burden of worry about health or changing medication. How much benefit a  
388 patient perceived from the intervention compared to burden seemed to be influenced by the  
389 dynamics of the patient-HCP interaction (described as ‘Improving Cooperation’ in BoT theory) and  
390 the patient’s own resources to manage their condition and cope with medication (described as  
391 “Capacity”).

392 Another important factor relating to the burden experienced was personal beliefs about BP and  
393 treatment. Those who recognised that their BP was too high and did not have concerns about side  
394 effects or taking medication appeared to have more positive experiences of the intervention,  
395 perceiving self-monitoring as more worthwhile, and feeling less anxious about seeing high readings  
396 or changing medication. This is consistent with the necessity-concerns framework<sup>18</sup>. BoT theory  
397 states that people who are better equipped with resources and are more resilient may cope better  
398 with the burden imposed by healthcare<sup>19</sup>, but the importance of an individual’s personal  
399 conceptualisation of their condition in how burdensome they find self-care is not strongly  
400 represented. This beliefs system may be partly encompassed by the “Relational Integration” aspect  
401 of BoT theory, which refers to the extent to which patients trust the tasks they do for healthcare, e.g.  
402 self-monitoring BP, and feel confident in the outcomes of these tasks, e.g. changing medication.  
403 However illness and treatment perceptions<sup>20</sup> are not explicitly covered by the theory and it may be  
404 helpful to consider them as additional factors which might influence the experience of treatment  
405 burden.

1  
2  
3 406  
4  
5

6 407 **Implications for measurement of benefit and burden**  
7

8  
9 408 The present study demonstrates the value of collecting in-depth qualitative data to develop a  
10  
11 409 detailed understanding of the burden of treatment, and to discover perceptions specific to the  
12  
13 410 context in which the intervention was implemented. The important psychosocial outcomes  
14  
15 411 discovered using qualitative research can inform the selection or development of relevant  
16  
17 412 quantitative measures to capture these factors in further evaluation.  
18

19  
20 413 Quantitative measures have been developed to appraise the structural aspects of burden of  
21  
22 414 treatment<sup>21,22</sup>, but these are not intended to assess psychosocial factors such as reassurance, anxiety  
23  
24 415 or uncertainty which this study suggests can influence the extent to which using an intervention is  
25  
26 416 experienced subjectively as a burden.  
27

28  
29 417 Future research could explore how best to capture the perceived burden or benefit of an  
30  
31 418 intervention. One approach might be to simply ask participants to quantify the net subjective burden  
32  
33 419 or benefit of interventions. However, it could be challenging for participants to weigh complex  
34  
35 420 heterogeneous psychosocial outcomes against one another and decide overall whether an  
36  
37 421 intervention was more burdensome or beneficial. Capturing the extent to which patients experience  
38  
39 422 positive or negative psychosocial outcomes might better assess how beneficial or burdensome the  
40  
41 423 intervention was perceived to be. Although this would not produce a single outcome measure, cost-  
42  
43 424 consequence analysis can be used to inform decision-making when an intervention has multiple  
44  
45 425 relevant outcomes which cannot be aggregated into one value<sup>23</sup>. Coast<sup>24</sup> discusses whether a  
46  
47 426 multidimensional approach is more informative for economic analysis or if a single aggregated value  
48  
49 427 is more pragmatic.  
50

51  
52  
53 428 Extending the evaluation of outcomes beyond health is in line with the capability approach<sup>25</sup>, which  
54  
55 429 focuses on broader aspects of subjective well-being which are not assessed by generic measures  
56  
57

1  
2  
3 430 such as the EQ-5D<sup>26</sup>. Tools used to capture perceived capability (such as the ICECAP<sup>27</sup>, and ASCOT<sup>28</sup>)  
4  
5 431 are gaining support as holistic measures of economic evaluation, but do not assess the more specific  
6  
7 432 psychosocial burdens and benefits of healthcare raised by participants in this study. Process utility  
8  
9 433 emphasises the need to quantitatively measure the value that people attach to healthcare delivery.  
10  
11 434 This approach might be relevant for evaluating how much value people perceive in the process of  
12  
13 435 using digital health interventions and the capability this achieves<sup>29</sup>. It has been argued that process  
14  
15 436 utility measures should also ask about the reasons behind patients' valuations, to better inform the  
16  
17 437 decision-maker<sup>30</sup>. This would help to capture the individual differences found in this study in how  
18  
19 438 people appraise the personal value of a digital intervention, informed by their underlying illness and  
20  
21 439 treatment beliefs.  
22  
23  
24

#### 25 440 **Strengths and limitations**

26  
27  
28 441 A strength of the study was that we used relatively open questions formulated by a multi-  
29  
30 442 disciplinary team which enabled us to elicit and explore a wide range of perceived burdens and  
31  
32 443 benefits, some of which were not anticipated at the outset of research. We are aware of the lead  
33  
34 444 researcher's potential influence on the data analysis, which we strived to minimise by transparent  
35  
36 445 memoing of decisions and regular team meetings to discuss the emerging themes. Participants were  
37  
38 446 sent newsletters to describe the findings of the study, but were not invited to provide feedback on  
39  
40 447 the analysis.  
41  
42  
43

44 448 We succeeded in speaking to well and poorly controlled hypertensive participants at different points  
45  
46 449 in the intervention, and there was a wide range of demographics in terms of age, education level  
47  
48 450 and gender in the sample. However, the uptake rate from those invited to interviews was not high,  
49  
50 451 particularly in the usual care group. Perhaps unsurprisingly, it was difficult to recruit low engagers in  
51  
52 452 the intervention group, which could have helped reach theoretical saturation. In terms of wider  
53  
54 453 applicability, we are aware that these findings may not be generalizable across other health  
55  
56 454 conditions, as the lack of symptoms in hypertension and the stepped pathway for changing  
57  
58 455 medication are quite unique features of this condition.  
59  
60

1  
2  
3 456  
4

5 457 Repeated interviews with the same participants may have offered more insight into the dynamic  
6  
7 458 nature of perceived burdens and benefits over time, although more regular conversations about the  
8  
9 459 target behaviour could have influenced participants' BP management behaviour therefore  
10  
11 460 threatening the RCT conclusions. It has been noted that a key issue with process evaluations of  
12  
13 461 interventions is the tendency for intervention content and impact to change over time<sup>7</sup>, such that  
14  
15 462 deciding the optimal point to collect evaluation data is challenging.  
16  
17

18  
19 463 Some of the burdens and benefits described by patients in this study were also found to a lesser  
20  
21 464 extent in the qualitative development of the HOME BP intervention, such as reassurance from seeing  
22  
23 465 well-controlled readings, and some concerns about side effects and high or variable readings<sup>31</sup>.  
24  
25 466 Others were novel and only arose when participants experienced the full HOME BP intervention  
26  
27 467 during the RCT as opposed to a prototype, for example the perceived health improvements from  
28  
29 468 medication changes. This demonstrates the value of conducting inductive qualitative research to  
30  
31 469 explore users' perspectives at each stage of intervention development and evaluation, in line with  
32  
33 470 the person-based approach<sup>9</sup>.  
34  
35

## 36 37 471 **CONCLUSIONS**

38  
39  
40  
41 472 In the context of this digital intervention, the study shows that participants' appraisal of burdens and  
42  
43 473 benefits appeared to be influenced by both intervention factors, such as BP readings and perceived  
44  
45 474 availability of the healthcare professional, and patient characteristics, such as perceptions of BP  
46  
47 475 control, previous experience of side effects, and co-morbidities. This nuanced evaluation would be  
48  
49 476 lost in a population-level analysis, demonstrating the advantage of a more individualised approach  
50  
51 477 for better understanding participants' perspectives of an intervention and how best to minimise the  
52  
53 478 burden of treatment.  
54  
55  
56  
57  
58  
59  
60

1  
2  
3 479 The study develops the recommendations of McNamee et al<sup>6</sup> that complex digital health  
4  
5 480 interventions warrant a wider perspective for measuring health outcomes, and discusses the  
6  
7 481 implications of capturing broader psychosocial outcomes for Burden of Treatment theory and health  
8  
9 482 economic evaluations.

11  
12 483 The finding that some participants perceived personal benefits from using the intervention  
13  
14 484 demonstrates that the process of healthcare can, in itself, be positive for some people, highlighting  
15  
16 485 the importance of capturing transient short-term benefits to take these into account as well as the  
17  
18 486 burden of self-management.

20  
21 487

23  
24 488

26  
27 489

1  
2  
3 490 **CONTRIBUTORS**  
4  
5

6 491 KM recruited participants, conducted interviews, analysed data, and wrote manuscript. LD & KB  
7  
8 492 contributed to study design and data analysis. KB and RB developed the digital intervention. PL &  
9  
10 493 RJM contributed to intervention development and interpretation of themes. CM & JR contributed to  
11  
12 494 theoretical and methodological implications of the study findings. LY contributed to study design,  
13  
14 495 data collection, data analysis, and interpretation.  
15

16  
17 496 All authors contributed to the manuscript preparation and provided final approval of the version to  
18  
19 497 be published.  
20  
21

22  
23 498•

24  
25 499• **FUNDING**  
26

27  
28 500 This independent research was funded by the National Institute for Health Research (NIHR)  
29  
30 501 Programme Grants for Applied Research Programme (Grant Reference Number RP-PG-1211-20001).  
31  
32 502 The views expressed are those of the author(s) and not necessarily those of the NHS, the NIHR, or  
33  
34 503 the Department of Health. RJM is funded by an NIHR Professorship (NIHR-RP-R2-12-015) and the  
35  
36 504 NIHR Oxford CLAHRC.  
37

38  
39  
40 505• **COMPETING INTERESTS**  
41

42  
43 506 RJM has received BP monitors for research purposes from Omron and Lloyds Pharmacies.  
44  
45

46 507• **ETHICS APPROVAL**  
47

48  
49 508• This qualitative process study was embedded in the HOME BP trial and approved by the University of  
50  
51 509 Southampton and NHS Hampshire A Research Ethics committees (REC Reference 15/SC/0082).  
52

53  
54 510 **DATA SHARING STATEMENT**  
55  
56  
57  
58  
59  
60

1  
2  
3 511 Requests for data sharing can be sent to the corresponding author. Full transcripts of interviews are  
4  
5 512 not available to protect participants' anonymity.  
6

7  
8 513

9 514 **Figure legend:**

10  
11 515 Figure 1 Possible influences of illness and treatment beliefs on perceived burdens and benefits of the  
12  
13 516 intervention  
14

15  
16 517  
17  
18  
19  
20  
21  
22  
23  
24  
25  
26  
27  
28  
29  
30  
31  
32  
33  
34  
35  
36  
37  
38  
39  
40  
41  
42  
43  
44  
45  
46  
47  
48  
49  
50  
51  
52  
53  
54  
55  
56  
57  
58  
59  
60

For peer review only

## 518 REFERENCES

- 519 1. May CR, Eton DT, Boehmer K, et al. Rethinking the patient: using Burden of  
520 Treatment Theory to understand the changing dynamics of illness. *BMC*  
521 *Health Serv Res* 2014;**14**(1):281.
- 522 2. Eton DT, de Oliveira DR, Egginton JS, et al. Building a measurement framework of  
523 burden of treatment in complex patients with chronic conditions: a  
524 qualitative study. *Patient Relat Outcome Meas* 2012;**3**:39.
- 525 3. Gallacher K, May CR, Montori VM, et al. Understanding patients' experiences of  
526 treatment burden in chronic heart failure using normalization process theory.  
527 *Ann Fam Med* 2011;**9**(3):235–43.
- 528 4. Sanders GD, Neumann PJ, Basu A, et al. Recommendations for conduct,  
529 methodological practices, and reporting of cost-effectiveness analyses:  
530 second panel on cost-effectiveness in health and medicine. *JAMA*  
531 2016;**316**(10):1093–103.
- 532 5. Ioannidis JP, Garber AM. Individualized cost-effectiveness analysis. *PLoS Med*  
533 2011;**8**(7):e1001058.
- 534 6. McNamee P, Murray E, Kelly MP, et al. Designing and undertaking a health  
535 economics study of digital health interventions. *Am J Prev Med*  
536 2016;**51**(5):852–60.
- 537 7. Moore GF, Audrey S, Barker M, et al. Process evaluation of complex interventions:  
538 Medical Research Council guidance. *BMJ* 2015;**350**:h1258.
- 539 8. Band R, Morton K, Stuart B, et al. Home and Online Management and Evaluation  
540 of Blood Pressure (HOME BP) digital intervention for self-management of  
541 uncontrolled, essential hypertension: a protocol for the randomised  
542 controlled HOME BP trial. *BMJ open* 2016;**6**(11):e012684.
- 543 9. Yardley L, Morrison L, Bradbury K, et al. The person-based approach to  
544 intervention development: application to digital health-related behavior  
545 change interventions. *J Med Internet Res* 2015;**17**(1).
- 546 10. Tong A, Sainsbury P, Craig J. Consolidated criteria for reporting qualitative  
547 research (COREQ): a 32-item checklist for interviews and focus groups. *Int J*  
548 *Qual Health Care* 2007;**19**(6):349–57.



- 1  
2  
3 549 11. Band R, Bradbury K, Morton K, et al. Intervention planning for a digital  
4 550 intervention for self-management of hypertension: a theory-, evidence- and  
5 551 person-based approach. *Implementation Science* 2017;**12**(1):25.  
6  
7  
8 552 12. Braun V, Clarke V. Using thematic analysis in psychology. *Qual Res Psychol*  
9 553 2006;**3**(2):77–101.  
10  
11 554 13. Marks DF, Yardley L. *Research methods for clinical and health psychology*. Sage,  
12 555 2004.  
13  
14 556 14. Strauss A, Corbin JM. *Grounded theory in practice*: Sage, 1997.  
15  
16 557 15. Charmaz K. *Constructing grounded theory*. Sage, 2014.  
17  
18 558 16. NVivo qualitative data analysis Software [program], 2012.  
19  
20 559 17. Rogers PJ, Stevens K, Boymal J. Qualitative cost-benefit evaluation of complex,  
21 560 emergent programs. *Eval Program Plann* 2009;**32**(1):83–90.  
22  
23 561 18. Horne R, Weinman J. Patients' beliefs about prescribed medicines and their role  
24 562 in adherence to treatment in chronic physical illness. *J Psychosom Res*  
25 563 1999;**47**(6):555–67.  
26  
27 564 19. Mair FS, May CR. Thinking about the burden of treatment. *Br Med J*  
28 565 2014;**349**:g6680.  
29  
30 566 20. Leventhal H, Diefenbach M, Leventhal EA. Illness cognition: using common  
31 567 sense to understand treatment adherence and affect cognition interactions.  
32 568 *Cognit Ther Res* 1992;**16**(2):143–63.  
33  
34 569 21. Eton DT, Yost KJ, Lai J-s, et al. Development and validation of the Patient  
35 570 Experience with Treatment and Self-management (PETS): a patient-reported  
36 571 measure of treatment burden. *Qual Life Res* 2017;**26**(2):489–503.  
37  
38 572 22. Tran V-T, Harrington M, Montori VM, et al. Adaptation and validation of the  
39 573 Treatment Burden Questionnaire (TBQ) in English using an internet platform.  
40 574 *BMC Med* 2014;**12**(1):109.  
41  
42 575 23. NICE. Incorporating economic evaluation. 2014.  
43 576 [https://www.nice.org.uk/process/pmg20/chapter/incorporating-economic-](https://www.nice.org.uk/process/pmg20/chapter/incorporating-economic-evaluation.12th)  
44 577 [evaluation.12th](https://www.nice.org.uk/process/pmg20/chapter/incorporating-economic-evaluation.12th) July 2017  
45  
46  
47 578 24. Coast J, Kinghorn P, Mitchell P. The development of capability measures in  
48 579 health economics: opportunities, challenges and progress. *Patient*  
49 580 2015;**8**(2):119–26.  
50  
51  
52  
53  
54  
55  
56  
57  
58  
59  
60

- 1  
2  
3  
4 581 25. Nussbaum M, Sen A. *The quality of life*: Clarendon Press – Oxford, 1993.
- 5  
6 582 26. Brazier J, Ratcliffe J, Saloman J, et al. *Measuring and valuing health benefits for*  
7 583 *economic evaluation*: OXFORD university press, 2017.
- 8  
9 584 27. Al-Janabi H, Flynn TN, Coast J. Development of a self-report measure of  
10 585 capability wellbeing for adults: the ICECAP-A. *Qual Life Res* 2012;**21**(1):167-  
11 586 76.
- 12  
13 587 28. Netten A, Burge P, Malley J, et al. Outcomes of social care for adults: developing  
14 588 a preference-weighted measure. *Health Technol Assess* 2012;**16**(16).
- 15  
16 589 29. Ryan M, Kinghorn P, Entwistle VA, et al. Valuing patients' experiences of  
17 590 healthcare processes: Towards broader applications of existing methods. *Soc*  
18 591 *Sci Med* 2014;**106**:194-203.
- 19  
20 592 30. Donaldson C, Shackley P. Does “process utility” exist? A case study of  
21 593 willingness to pay for laparoscopic cholecystectomy. *Soc Sci Med*  
22 594 1997;**44**(5):699-707.
- 23  
24 595 31. Bradbury K, Morton K, Grist R, et al. Using the Person-Based Approach to  
25 596 optimise a digital intervention for the management of hypertension. *In*  
26 597 *submission* 2017.
- 27  
28  
29  
30  
31 598

1  
2  
3  
4  
5  
6  
7  
8  
9  
10  
11  
12  
13  
14  
15  
16  
17  
18  
19  
20  
21  
22  
23  
24  
25  
26  
27  
28  
29  
30  
31  
32  
33  
34  
35  
36  
37  
38  
39  
40  
41  
42  
43  
44  
45  
46  
47

For peer review only

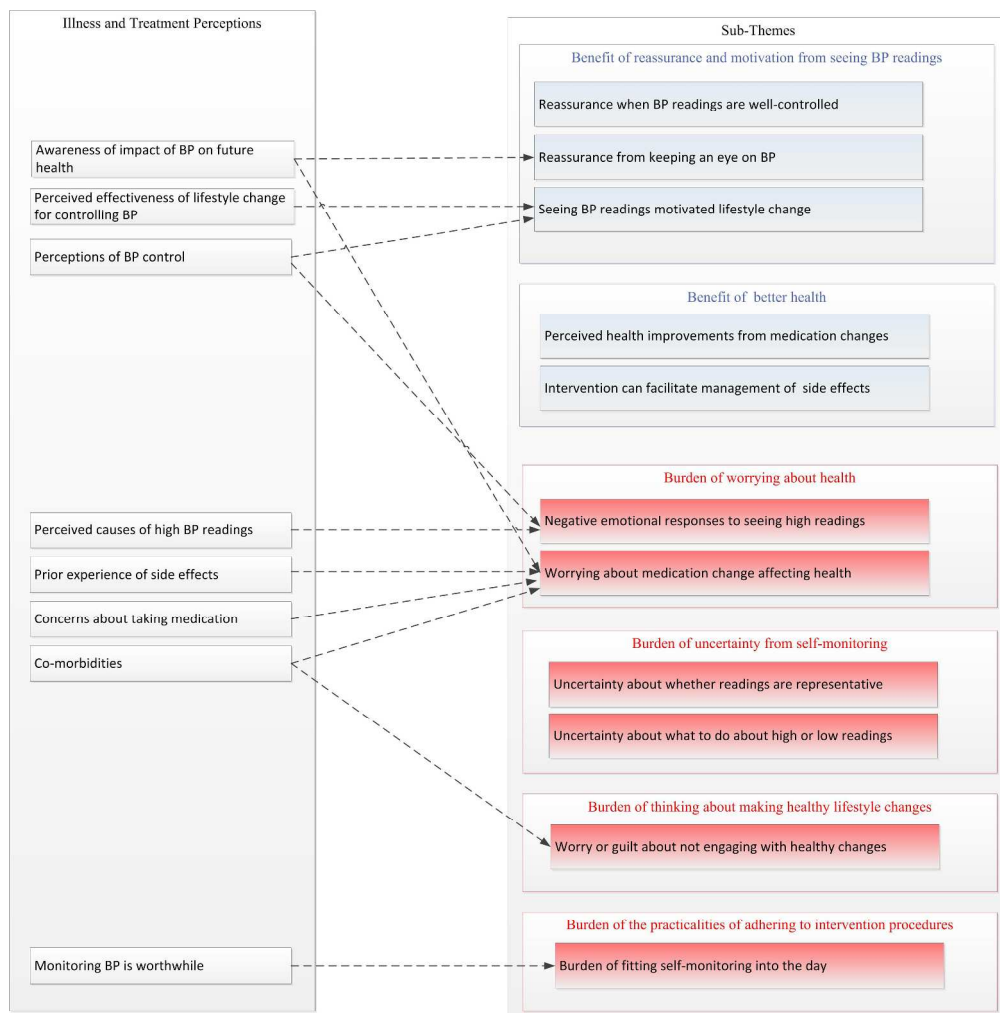

Figure 1. Possible influences of illness and treatment beliefs on perceived burdens and benefits of the intervention

337x340mm (300 x 300 DPI)

## Consolidated criteria for reporting qualitative studies (COREQ): 32-item checklist

Developed from:

Tong A, Sainsbury P, Craig J. Consolidated criteria for reporting qualitative research (COREQ): a 32-item checklist for interviews and focus groups. *International Journal for Quality in Health Care*. 2007. Volume 19, Number 6: pp. 349 – 357

**YOU MUST PROVIDE A RESPONSE FOR ALL ITEMS. ENTER N/A IF NOT APPLICABLE**

| No. Item                                       | Guide questions/description                                                                                                                              | Reported on Page # |
|------------------------------------------------|----------------------------------------------------------------------------------------------------------------------------------------------------------|--------------------|
| <b>Domain 1: Research team and reflexivity</b> |                                                                                                                                                          |                    |
| <i>Personal Characteristics</i>                |                                                                                                                                                          |                    |
| 1. Interviewer/facilitator                     | Which author/s conducted the interview or focus group?                                                                                                   | Page 9             |
| 2. Credentials                                 | What were the researcher's credentials?<br>E.g. PhD, MD                                                                                                  | Page 9             |
| 3. Occupation                                  | What was their occupation at the time of the study?                                                                                                      | Page 9             |
| 4. Gender                                      | Was the researcher male or female?                                                                                                                       | Page 9             |
| 5. Experience and training                     | What experience or training did the researcher have?                                                                                                     | Page 9             |
| <i>Relationship with participants</i>          |                                                                                                                                                          |                    |
| 6. Relationship established                    | Was a relationship established prior to study commencement?                                                                                              | N/A                |
| 7. Participant knowledge of the interviewer    | What did the participants know about the researcher? e.g. personal goals, reasons for doing the research                                                 | N/A                |
| 8. Interviewer characteristics                 | What characteristics were reported about the interviewer/facilitator? e.g. Bias, assumptions, reasons and interests in the research topic                | Page 9             |
| <b>Domain 2: study design</b>                  |                                                                                                                                                          |                    |
| <i>Theoretical framework</i>                   |                                                                                                                                                          |                    |
| 9. Methodological orientation and Theory       | What methodological orientation was stated to underpin the study? e.g. grounded theory, discourse analysis, ethnography, phenomenology, content analysis | Page 9             |
| <i>Participant selection</i>                   |                                                                                                                                                          |                    |
| 10. Sampling                                   | How were participants selected? e.g. purposive, convenience, consecutive, snowball                                                                       | Page 8             |
| 11. Method of approach                         | How were participants approached? e.g. face-to-face, telephone, mail, email                                                                              | Page 8             |

|                                        |                                                                                                                                 |                    |
|----------------------------------------|---------------------------------------------------------------------------------------------------------------------------------|--------------------|
| 12. Sample size                        | How many participants were in the study?                                                                                        | Page 10            |
| 13. Non-participation                  | How many people refused to participate or dropped out? Reasons?                                                                 | Page 10            |
| <i>Setting</i>                         |                                                                                                                                 |                    |
| 14. Setting of data collection         | Where was the data collected? e.g. home, clinic, workplace                                                                      | Page 8             |
| 15. Presence of non-participants       | Was anyone else present besides the participants and researchers?                                                               | N/A                |
| 16. Description of sample              | What are the important characteristics of the sample? e.g. demographic data, date                                               | Page 11            |
| <i>Data collection</i>                 |                                                                                                                                 |                    |
| 17. Interview guide                    | Were questions, prompts, guides provided by the authors? Was it pilot tested?                                                   | Page 9             |
| 18. Repeat interviews                  | Were repeat inter views carried out? If yes, how many?                                                                          | N/A                |
| 19. Audio/visual recording             | Did the research use audio or visual recording to collect the data?                                                             | Page 9             |
| 20. Field notes                        | Were field notes made during and/or after the interview or focus group?                                                         | Page 9             |
| 21. Duration                           | What was the duration of the inter views or focus group?                                                                        | Page 11            |
| 22. Data saturation                    | Was data saturation discussed?                                                                                                  | Page 9             |
| 23. Transcripts returned               | Were transcripts returned to participants for comment and/or correction?                                                        | N/A                |
| <b>Domain 3: analysis and findings</b> |                                                                                                                                 |                    |
| <i>Data analysis</i>                   |                                                                                                                                 |                    |
| 24. Number of data coders              | How many data coders coded the data?                                                                                            | Page 9             |
| 25. Description of the coding tree     | Did authors provide a description of the coding tree?                                                                           | Page 13            |
| 26. Derivation of themes               | Were themes identified in advance or derived from the data?                                                                     | Page 9-10          |
| 27. Software                           | What software, if applicable, was used to manage the data?                                                                      | Page 10            |
| 28. Participant checking               | Did participants provide feedback on the findings?                                                                              | Page 26            |
| <i>Reporting</i>                       |                                                                                                                                 |                    |
| 29. Quotations presented               | Were participant quotations presented to illustrate the themes/findings? Was each quotation identified? e.g. participant number | Throughout results |
| 30. Data and findings consistent       | Was there consistency between the data presented and the findings?                                                              | Yes                |
| 31. Clarity of major themes            | Were major themes clearly presented in the findings?                                                                            | Yes                |
| 32. Clarity of minor themes            | Is there a description of diverse cases or discussion of minor themes?                                                          | Yes                |

1  
2  
3  
4 **Once you have completed this checklist, please save a copy and upload it as part**  
5 **of your submission. When requested to do so as part of the upload process,**  
6 **please select the file type: *Checklist*. You will NOT be able to proceed with**  
7 **submission unless the checklist has been uploaded. Please DO NOT include this**  
8 **checklist as part of the main manuscript document. It must be uploaded as a**  
9 **separate file.**  
10  
11  
12  
13  
14  
15  
16  
17  
18  
19  
20  
21  
22  
23  
24  
25  
26  
27  
28  
29  
30  
31  
32  
33  
34  
35  
36  
37  
38  
39  
40  
41  
42  
43  
44  
45  
46  
47  
48  
49  
50  
51  
52  
53  
54  
55  
56  
57  
58  
59  
60

For peer review only

1  
2  
3  
4 **Supplementary File 2. Interview schedules for intervention and usual care group**  
5  
6

7 Intervention group interview schedule  
8  
9

10 **Opening questions**  
11

12 Can you tell me about what it is like for you to have high blood pressure?  
13

14 How did you feel when you were first told you had high blood pressure?  
15

16 Can you tell me why you decided to sign up for the Home BP study?  
17

18 I'm really interested in hearing about your experiences of using HOME BP, can you tell me all about  
19 it?  
20  
21  
22

23 Can you tell me about anything that you have liked about the HOME BP study so far?  
24

25 Can you tell me about anything that you have disliked?  
26  
27

28 Can you tell me about any advantages of using HOME BP?  
29  
30

31 And can you tell me about any disadvantages of using HOME BP?  
32  
33

34 How do you feel about your high blood pressure now?  
35  
36

37 Do you think you would choose to keep on using the HOME BP programme if it was still available  
38 after a year?  
39  
40

41 Why/ Why not?  
42  
43

44 Would you recommend the HOME BP programme to other people with high blood pressure?  
45  
46

47 **Self-monitoring**  
48

49 **Experiences of monitoring:**  
50

51 Can you tell me about what it was like when you were learning how to use your BP monitor at home?  
52  
53

54 Can you tell me about the first time you used your BP monitor at home in the study?  
55  
56  
57  
58  
59  
60



1  
2  
3 Can you tell me about what it has been like to monitor your blood pressure yourself?  
4

5 How did it make you feel?  
6

7 Had you ever monitored your own blood pressure before you took part in the HOME BP study?  
8

9  
10 *If yes:*

11 Can you tell me a bit more about this?  
12

13 Can you tell me whether you've noticed any changes in how you monitor your blood  
14  
15  
16  
17  
18  
19  
20  
21  
22  
23  
24  
25  
26  
27  
28  
29  
30  
31  
32  
33  
34  
35  
36  
37  
38  
39  
40  
41  
42  
43  
44  
45  
46  
47  
48  
49  
50  
51  
52  
53  
54  
55  
56  
57  
58  
59  
60  
pressure since you've started the HOME BP programme?

All: Can you tell me about any concerns that you have about monitoring your blood pressure?

Adherence to the monitoring schedule:

The HOME BP programme reminds you to monitor your blood pressure for 7 days every 4 weeks.

Can you tell me about what it has been like for you to try and monitor your blood pressure for 7 days every 4 weeks?

Can you tell me about the time of day you have been monitoring your blood pressure so far?

How do you feel about the instructions HOME BP gives about when to monitor?

Was there anything that helped you to monitor your own blood pressure?

Was there anything that made it harder to monitor your own blood pressure?

Can you tell me about any time when you had to skip your blood pressure monitoring or change when you did it in the day?

Can you tell me how you found it entering your readings on the HOME BP programme?

1  
2  
3 Feedback messages  
4  
5

6 Remember after you enter your readings on HOME BP, you see a message which says 'your readings  
7 were amber, or green'? What did you think about these messages?  
8  
9

10  
11 Can you tell me about how you felt when you saw a message about your blood pressure readings on  
12 HOME BP?  
13  
14

15  
16 How did you feel about monitoring your own blood pressure after reading that message?  
17  
18

19  
20 Did you have any very high or very low readings (red/blue) when you were monitoring in the HOME  
21 BP study? How did you feel?  
22  
23  
24

25 **2. Medication change**  
26  
27

28 Can you tell me about what it's like for you taking medication for your high blood pressure?  
29  
30

31 Have you been recommended to make a medication change during the HOME BP study?  
32  
33

34 *If yes:*  
35  
36

37 How did you feel about making a change to your medication when HOME BP recommended  
38 it?  
39  
40

41  
42 Did you make this change to your medication?  
43  
44  
45

46 ***If they chose to make a change:***  
47  
48

49 Can you tell me about what it was like to make a medication change in the HOME BP study?  
50  
51

52 Can you tell me about how the medication change came about?  
53  
54

55 How did you get on with your new medication?  
56  
57

58 How would you feel if HOME BP recommended a medication change for you now?  
59  
60

1  
2  
3 ***If they chose not to make a change –***  
4

5  
6 Can you tell me about why you decided not to change your medication?  
7

8  
9 How would you feel if HOME BP recommended another medication change for you now?  
10

11  
12 ***If no:***  
13

14  
15 ***If patient has not been recommended a med change:*** How do you feel about changing your  
16 medication if your blood pressure stayed too high for too long?  
17

18  
19 Can you tell me about any concerns that you have about doing this?  
20

21  
22 ***All:***  
23

24  
25 How did you feel about making changes to your medication before you took part in HOME BP?  
26  
27

28  
29 **3. HCP support**  
30

31  
32 Can you tell me about the contact you have had with your GP or nurse so far in the HOME BP study?  
33

34  
35 Can you tell me about how you have found the support from your GP or nurse while you were taking  
36 part in the HOME BP study?  
37

38  
39 Can you tell me what you thought about receiving emails from your nurse about HOME BP?  
40

41  
42 If needed, follow-up questions:  
43

44  
45 Have you seen your GP about your blood pressure since the start of the study?  
46

47  
48 And what about appointments with the nurse?  
49

50  
51 Can you tell me about how you have found the emails from HOME BP?  
52

53  
54 **4. Healthy changes**  
55

56  
57 Can you tell me about anything else that you do to try and manage your high blood pressure?  
58  
59  
60

1  
2  
3 There is an option on the HOME BP programme to look at online sessions about making healthy  
4 changes that can help lower your blood pressure, I wonder if you remember if you have seen it?  
5  
6  
7

8 *If no:*  
9

10  
11 Can you tell about how you might feel about making healthy changes to help lower your blood  
12 pressure?  
13  
14  
15

16 *If yes:*  
17

18  
19 Can you tell me about how you found the session on healthy changes?  
20  
21

22  
23 How did you feel about making the healthy changes this session talked about?  
24  
25

26 *If they chose a change:* Can you tell me about what made you choose this/these ones?  
27  
28

29 How did you find the online session about xxxx (cutting down on salt/alcohol/eating a healthier  
30 diet/doing more physical activity/ losing weight)?  
31  
32  
33

34 Can you tell me about what it was like for you trying out this healthy change?  
35  
36

37 How did making a healthy change like this make you feel?  
38  
39

40 *Or if they didn't choose any:* Can you tell me about why you didn't want to choose a healthy change?  
41  
42

43 *All:* Can you tell me about any concerns that you have about making a new healthy change?  
44  
45

46 Is there anything else you would like to tell me about the HOME BP study that we haven't already  
47 talked about?  
48  
49  
50

1  
2  
3 Usual care group interview schedule  
4  
5

6 General questions about BP  
7

8  
9 Can you tell me about what it is like for you to have high blood pressure?  
10

11  
12 How did you feel when you were first told you had high blood pressure?  
13

14  
15 Can you talk me through what (if anything) you currently do to manage/control your high blood  
16  
17 pressure?  
18

19  
20 Can you tell me about how your GP and practice nurse are involved in helping you to control  
21  
22 your high blood pressure?  
23

24  
25 How do you feel about monitoring your own blood pressure at home?  
26

27  
28 If they already monitor – can you tell me a bit more about this?  
29

30  
31 Can you tell me about what it's like for you taking medication for your high blood pressure?  
32

33  
34 Can you tell me how you feel about your GP making changes to your blood pressure medication?  
35  
36

37  
38 HOME BP study experience  
39

40  
41 Can you tell me why you signed up for the Home BP study?  
42

43  
44 Can you tell me all about what it has been like for you being in the HOME BP study in the usual  
45  
46 care group?  
47

48  
49 At the start of the HOME BP study, you had a baseline appointment with a nurse at your GP  
50  
51 Practice – can you tell me about that?  
52

53  
54 How did you find it using the HOME BP programme to fill in your questionnaires online at the  
55  
56 start of the study?  
57  
58  
59  
60

1  
2  
3 After you had completed your questionnaires, did you have an appointment with your GP to  
4  
5 check your blood pressure medication? Can you tell me about this?  
6  
7

8 HCP support  
9

10  
11 Can you tell me about the contact you have had with your GP or nurse so far in the HOME BP  
12  
13 study?  
14  
15

16  
17 Can you tell me about how you have found the support from your GP or nurse while you were  
18  
19 taking part in the HOME BP study?  
20  
21

# BMJ Open

## A qualitative process study to explore the perceived burdens and benefits of a digital intervention for self-managing high blood pressure in Primary Care in the UK.

|                                 |                                                                                                                                                                                                                                                                                                                                                                                                                                                                                                                                                                                                                                         |
|---------------------------------|-----------------------------------------------------------------------------------------------------------------------------------------------------------------------------------------------------------------------------------------------------------------------------------------------------------------------------------------------------------------------------------------------------------------------------------------------------------------------------------------------------------------------------------------------------------------------------------------------------------------------------------------|
| Journal:                        | <i>BMJ Open</i>                                                                                                                                                                                                                                                                                                                                                                                                                                                                                                                                                                                                                         |
| Manuscript ID                   | bmjopen-2017-020843.R2                                                                                                                                                                                                                                                                                                                                                                                                                                                                                                                                                                                                                  |
| Article Type:                   | Research                                                                                                                                                                                                                                                                                                                                                                                                                                                                                                                                                                                                                                |
| Date Submitted by the Author:   | 28-Feb-2018                                                                                                                                                                                                                                                                                                                                                                                                                                                                                                                                                                                                                             |
| Complete List of Authors:       | Morton, Katherine; University of Southampton, Psychology<br>Dennison, Laura; University of Southampton, Psychology<br>Bradbury, Katherine; University of Southampton, Psychology<br>Band, Rebecca; University of Southampton, Psychology<br>May, Carl; University of Southampton, Faculty of Health Sciences<br>Raftery, James; Southampton University, School of Medicine<br>Little, Paul; University of Southampton, Primary Care and Population Science<br>McManus, Richard; University of Oxford, Dept of Primary Care Health Sciences<br>Yardley, Lucy ; University of Oxford, Nuffield Department of Primary Health Care Sciences |
| <b>Primary Subject Heading</b>: | Qualitative research                                                                                                                                                                                                                                                                                                                                                                                                                                                                                                                                                                                                                    |
| Secondary Subject Heading:      | Cardiovascular medicine, Health services research, Public health                                                                                                                                                                                                                                                                                                                                                                                                                                                                                                                                                                        |
| Keywords:                       | Self-management, digital intervention, qualitative, treatment burden                                                                                                                                                                                                                                                                                                                                                                                                                                                                                                                                                                    |
|                                 |                                                                                                                                                                                                                                                                                                                                                                                                                                                                                                                                                                                                                                         |

SCHOLARONE™  
Manuscripts

1  
2  
3  
4  
5  
6 **1 Title page**  
7  
8  
9

10 **2 A qualitative process study to explore the perceived burdens and benefits of a digital**  
11  
12 **3 intervention for self-managing high blood pressure in Primary Care in the UK.**  
13  
14

15 4 Kate Morton<sup>a\*</sup>, Laura Dennison<sup>a</sup>, Katherine Bradbury<sup>a</sup>, Rebecca Band<sup>a</sup>, Carl May<sup>b</sup>, James Raftery<sup>c</sup>,  
16  
17 5 Paul Little<sup>d</sup>, Richard J. McManus<sup>e</sup>, & Lucy Yardley<sup>a</sup>  
18  
19

20 6 a. Academic unit of psychology, University of Southampton, Southampton, UK  
21

22 7 b. Faculty of Health Sciences, University of Southampton, Southampton, UK  
23

24 8 c. Faculty of Medicine, University of Southampton, Southampton, UK  
25

26 9 d. Primary Care Research, University of Southampton, Southampton, UK  
27

28  
29 10 e. Nuffield Department of Primary Care Health Sciences, University of Oxford, Oxford, UK  
30  
31

32 11  
33  
34  
35

36 12 \*Corresponding author: [ksm1r13@soton.ac.uk](mailto:ksm1r13@soton.ac.uk); 02380 592234  
37  
38

39 13 Room 3063, B44, University of Southampton, Southampton, SO17 1BJ  
40  
41

42 14  
43  
44

45 15 Word count 5044  
46  
47

48 16  
49  
50

51 17  
52  
53

54 18  
55  
56  
57  
58  
59  
60



1  
2  
3 19  
4  
5  
6  
78 **20 ABSTRACT**

9  
10  
11 **21 Objectives:** Digital interventions can change patients' experiences of managing their health, either  
12  
13 **22** creating additional burden or improving their experience of healthcare. This qualitative study aimed  
14  
15 **23** to explore perceived burdens and benefits for patients using a digital self-management intervention  
16  
17 **24** for reducing high blood pressure. A secondary aim was to further our understanding of how best to  
18  
19 **25** capture burdens and benefits when evaluating health interventions.

20  
21  
22 **26 Design:** Inductive qualitative process study nested in a randomised controlled trial.

23  
24  
25 **27 Setting:** Primary Care in the UK

26  
27  
28 **28 Participants:** 35 participants taking antihypertensive medication and with uncontrolled blood  
29  
30 **29** pressure at baseline participated in semi-structured telephone interviews.

31  
32  
33 **30 Intervention:** Digital self-management intervention to support blood pressure self-monitoring and  
34  
35 **31** medication change when recommended by the healthcare professional.

36  
37  
38 **32 Analysis:** Data were analysed using inductive thematic analysis with techniques from grounded  
39  
40 **33** theory.

41  
42  
43 **34 Results:** Seven themes were developed which reflected perceived burdens and benefits of using the  
44  
45 **35** intervention, including worry about health, uncertainty about self-monitoring, and reassurance. The  
46  
47 **36** analysis showed how beliefs about their condition and treatment appeared to influence participants'  
48  
49 **37** appraisal of the value of the intervention. This suggested that considering illness and treatment  
50  
51 **38** perceptions in Burden of Treatment theory could further our understanding of how individuals  
52  
53 **39** appraise the personal costs and benefits of self-managing their health.  
54  
55  
56  
57  
58  
59  
60

1  
2  
3 40 **Conclusions:** Patients' appraisal of the burden or benefit of using a complex self-management  
4  
5 41 intervention seemed to be influenced by experiences within the intervention (such as perceived  
6  
7 42 availability of support) and beliefs about their condition and treatment (such as perceived control  
8  
9 43 and risk of side effects). Developing our ability to adequately capture these salient burdens and  
10  
11 44 benefits for patients could help enhance evaluation of self-management interventions in the future.  
12  
13 45 Many participants perceived important benefits from using the intervention, highlighting the need  
14  
15 46 for theory to recognise that engaging in self-management can include positive as well as negative  
16  
17 47 aspects.  
18  
19  
20 48

21  
22  
23 49 Trial registration: ISRCTN13790648. Registered 14 May 2015.  
24

25 50 **Keywords:** Self-management; digital intervention; qualitative; treatment burden  
26  
27

28 51 **Strengths and limitations of this study:**

- 29 52 ❖ The exploratory, open approach to data collection enabled us to capture whichever benefits or  
30  
31 53 burdens were most salient to the participants.  
32  
33 54 ❖ We only interviewed participants at one point in time, so were unable to gain an understanding  
34  
35 55 of dynamic changes in perceived benefits or burdens over time.  
36  
37 56 ❖ Both well and poorly controlled hypertensive patients took part in the interviews, but it was  
38  
39 57 difficult to recruit low users of the intervention which could limit the generalisability of the  
40  
41 58 findings.  
42  
43 59 ❖ The asymptomatic nature of hypertension and the unique medication change pathway means  
44  
45 60 that these findings may not be generalisable across conditions.  
46  
47  
48  
49  
50  
51  
52  
53  
54  
55  
56  
57  
58  
59  
60  
61  
62

## 63 BACKGROUND

64 The work involved in looking after one's health when living with a chronic condition can include  
65 complex tasks such as organising and adhering to treatment regimens, interacting with healthcare  
66 professionals (HCPs), regular monitoring of health indicators, and making health-related decisions,  
67 all of which can accumulate into a considerable burden<sup>1</sup>. Digital self-management interventions are  
68 often developed to improve health outcomes, but these interventions could also either increase or  
69 minimise the burden of the healthcare process for patients. Developing our understanding of the  
70 burdens of self-management can help to better optimise the delivery of healthcare to improve  
71 adherence and well-being<sup>1-3</sup>. Burden of Treatment (BoT) theory provides a mechanism for  
72 understanding these experiences in the context of patients' personal capacity to cope, with  
73 emphasis on the role of wider healthcare systems and social networks available to the patient<sup>1</sup>.

74 Health economic evaluations also focus on understanding the impact of healthcare on patients,  
75 seeking to weigh up the resources used against the health outcomes in order to better inform  
76 decision-making. Recent guidelines for economic evaluations in health and medicine recommend  
77 adopting a societal perspective such that all relevant outcomes are evaluated, rather than focusing  
78 only on formal healthcare costs<sup>4</sup>. In particular, personal costs such as time spent in self-care should  
79 be included. Consequently, BoT theory and health economic evaluations share an interest in  
80 adequately capturing the wider burdens or personal costs of engaging with healthcare. For  
81 consistency in terminology in this paper, negative outcomes/personal costs of healthcare will be  
82 referred to as 'burdens'.

83 BoT theory considers patients' time as a resource that is used by the healthcare system, while health  
84 economic evaluation counts time as an 'opportunity cost' whereby the patient 'spends' time that  
85 could have been spent on something other than healthcare. However, subjective experiences of  
86 time spent on digital interventions may be varied and complex. Heterogeneity in the relative value  
87 placed on the outcomes of the intervention<sup>5</sup> may mean that for some participants the time spent

1  
2  
3 88 engaging with elements of an intervention is not perceived as a burden but rather as a benefit,  
4  
5 89 either because it is interesting, pleasant or meaningful in and of itself or because of the positive  
6  
7 90 outcomes it can lead to. In other words, some people may actually like engaging with healthcare.  
8  
9 91 The value of exploring the personal benefits of intervention participation has not received as much  
10  
11 92 focus as understanding the costs, such as treatment burden. McNamee et al.<sup>6</sup> proposed that the  
12  
13 93 health research guidelines for economic analysis may need to be adjusted for digital health  
14  
15 94 interventions to ensure we can fully capture the heterogeneous costs and benefits arising when  
16  
17 95 complex interventions are implemented in complex systems.  
18  
19  
20  
21 96 To further our understanding of how patients perceive benefits and burdens when using digital  
22  
23 97 health interventions, we carried out a qualitative process study<sup>7</sup>. The digital HOME BP intervention  
24  
25 98 was developed based on best practice recommendations to help improve hypertension in poorly  
26  
27 99 controlled patients by facilitating self-monitoring of blood pressure (BP) at home and prompting  
28  
29 100 appropriate intensification of medication by HCPs<sup>8</sup>. This intervention could help to minimise the  
30  
31 101 treatment burden of hypertension by providing an online healthcare system in which HCPs have  
32  
33 102 sight of patients' home readings, streamlining the process for finding the most effective medication  
34  
35 103 without the need for attending the GP surgery. However, HOME BP is a complex, interactive multi-  
36  
37 104 component intervention, which creates potential diversity in the perceived burden and benefits for  
38  
39 105 participants using it. The contexts in which the intervention is embedded may also be diverse, and  
40  
41 106 factors such as individual differences in patients' health status, beliefs about medication and risks of  
42  
43 107 high BP, availability of time and resources, and access to support may influence how the  
44  
45 108 intervention is perceived and valued. The HOME BP intervention was developed using the person-  
46  
47 109 based approach<sup>9</sup> which emphasises the importance of understanding participants' unique  
48  
49 110 perspectives and different situations when developing and implementing digital interventions.  
50  
51 111 Adopting a more granular approach to the evaluation of benefit and burden is consistent with the  
52  
53  
54  
55  
56  
57  
58  
59  
60

1  
2  
3 112 person-based approach, and with the BoT approach of fully understanding the participants'  
4  
5 113 perspective.  
6  
7  
8 114 The present study aimed to explore the perceived burden and benefits of using a digital health  
9  
10 115 intervention for self-managing BP using qualitative process interviews with intervention and usual  
11  
12 116 care participants taking part in a randomised controlled trial (RCT). This paper seeks to interpret the  
13  
14 117 implications for optimising the capture of perceived costs and benefits in health economic  
15  
16 118 evaluations and evaluating the burden of treatment.  
17  
18  
19  
20 119

## 120 **METHODS**

### 121 **Design**

122 A qualitative process study embedded in the HOME BP trial<sup>8</sup> was approved by the University of  
123 Southampton and NHS Research Ethics committees. The COREQ checklist (Consolidated criteria for  
124 reporting qualitative studies) was used to ensure comprehensive reporting of the study<sup>10</sup>  
125 (supplementary file 1).  
126

### 127 **Intervention**

128 The HOME BP programme supported participants to self-manage their high BP, primarily via home  
129 self-monitoring of BP and making changes to dose/drug type when recommended by the HCP.  
130 Lifestyle change modules were also available, but optional as the key target behaviours for the  
131 intervention were self-monitoring and medication change adherence<sup>8,11</sup>. Participants using HOME  
132 BP were supported by a 'prescriber' (GP or nurse prescriber responsible for changing medication)

1  
2  
3 133 and a 'supporter' (nurse or healthcare assistant who supported participants in self-monitoring and  
4  
5 134 choosing lifestyle changes).  
6  
7  
8 135 Participants were invited to use the online programme by their GP and were randomised to usual  
9  
10 136 care or intervention after completing baseline measures online. Those randomised to the  
11  
12 137 intervention group completed two online training sessions which sought to overcome concerns  
13  
14 138 about variability in readings and changing medication. Participants were encouraged to monitor  
15  
16 139 their BP in the mornings, but the programme allowed flexibility as it was most important that people  
17  
18 140 found a time of day that suited them to monitor their BP. Both intervention and usual care  
19  
20 141 participants were followed up at 6 and 12 months post-randomisation.  
21  
22  
23 142 Table 1 describes the HOME BP intervention in more detail.  
24  
25  
26 143 Table 1 HOME BP Intervention Characteristics  
27

| Target behaviour   | Description                                                                                                                                                                                                                                                                                                                                                                                                                                                                                                             |
|--------------------|-------------------------------------------------------------------------------------------------------------------------------------------------------------------------------------------------------------------------------------------------------------------------------------------------------------------------------------------------------------------------------------------------------------------------------------------------------------------------------------------------------------------------|
| Self-monitoring BP | Participants monitored their BP at home for 7 days every 4 weeks. After 7 days, they entered their BP readings on the HOME BP website and received instant automated feedback using a traffic light system. If BP was very high (red) or very low (blue), they were told to contact their GP surgery. If BP was above target (amber), they were told their prescriber would contact them about a medication change. If BP was on target (green), they were congratulated and asked to monitor their BP again next time. |
| Medication change  | The prescriber planned three potential medication changes with the participant at the start of the study. HOME BP informed prescribers by email when a patient's home BP readings were above-target and they could implement a pre-                                                                                                                                                                                                                                                                                     |

|                            |                                                                                                                                                                                                                                                                                                                                                                                                                                                                                                                                      |
|----------------------------|--------------------------------------------------------------------------------------------------------------------------------------------------------------------------------------------------------------------------------------------------------------------------------------------------------------------------------------------------------------------------------------------------------------------------------------------------------------------------------------------------------------------------------------|
|                            | planned change without needing to see the participant for an appointment.                                                                                                                                                                                                                                                                                                                                                                                                                                                            |
| Optional lifestyle changes | At nine weeks after randomisation, participants had the option of choosing an online session to support lifestyle change to help control their BP, specifically weight management, salt reduction, healthy diet, physical activity, or alcohol reduction. Participants were alerted by email when this became available, and saw an option to view the healthy lifestyles session each time they logged on to HOME BP. The online lifestyle change sessions could be started at any time during the 12-month trial, from nine weeks. |

144

145 **Participants**

146 Patients were eligible to take part in the HOME BP trial if they had uncontrolled hypertension  
 147 managed in Primary Care (mean BP reading of 140/90 mm Hg or more at baseline taken at the GP  
 148 surgery using a validated electronic automated sphygmomanometer (BP TRU BPM 200)). In addition,  
 149 they needed to be prescribed 1-3 antihypertensive medications at baseline, and aged over 18 (full  
 150 inclusion and exclusion criteria are listed in the protocol<sup>8</sup>).

151 Both intervention and usual care participants were invited to take part in interviews as we felt that  
 152 obtaining an understanding of managing BP in usual care would aid interpretation of the perceived  
 153 burden and benefits of the intervention. We aimed to speak to participants at a range of time-points  
 154 during the 12-month trial from 10 weeks onwards as this gave participants the opportunity to  
 155 become familiar with HOME BP. No new intervention content was introduced after the lifestyles  
 156 sessions became available at nine weeks.

### 157 **Recruitment and interview procedure**

158 A sub-sample of RCT participants were invited by email to provide feedback on their experiences of  
159 managing their BP (n=78, of 622 patients in the RCT). Informed consent was taken by post or online,  
160 depending on participant preference. Recruitment was initially opportunistic, but subsequently a  
161 purposive approach was adopted to target younger participants, low engagers, and those with  
162 recent uncontrolled self-monitored BP readings, informed by the concurrent analysis. Recruitment  
163 was stopped once the researchers agreed that data saturation had been reached and no new  
164 burdens or benefits were arising.

165 Semi-structured interview schedules were co-developed by experts in health psychology (KM, KB, RB,  
166 LY, LD), health economics (JR) and sociology (CM). Open, inductive questions were carefully selected  
167 to elicit data about the burden and benefits of BP management perceived as most salient by the  
168 participants (see Supplementary File 2 for interview schedules). The interviews were conducted by  
169 telephone to minimise the burden on participants, except in one case where the participant asked to  
170 meet face-to-face due to struggling with hearing on the telephone. The interviews took place  
171 between February 2016 and February 2017. Each participant was given a £10 gift voucher to thank  
172 them for their time.

173 All interviews were conducted by KM (MSc, BSc. termed “the researcher”), a female PhD candidate  
174 in Health Psychology who was also employed as a research assistant. Each interview was audio-  
175 recorded, and the researcher also took notes and completed a self-reflection log afterwards to  
176 record any emerging thoughts on the data. Audio-recordings were transcribed verbatim and checked  
177 thoroughly by the researcher.

### 178 **Patient and Public Involvement**

179 Patient and public involvement (PPI) representatives have been involved in the design and conduct  
180 of the randomised controlled trial, including decisions about recruitment processes, outcome



1  
2  
3 181 measures and trial procedures. We also discussed the findings of this qualitative process study with  
4  
5 182 our PPI to facilitate our interpretations of the data. The participants in the study were patients,  
6  
7 183 ensuring we were collecting experiences of burden from the target population, and the results were  
8  
9 184 fed back to the study participants as a newsletter.  
10

## 11 12 13 185 **Analysis**

14  
15  
16 186 The analysis was an iterative process led by KM, supported by frequent discussion of emerging  
17  
18 187 themes with LY and LD (who have extensive experience in qualitative research) along with input  
19  
20 188 regarding health economic and sociological perspectives (JR and CM). Inductive thematic analysis  
21  
22 189 methods were used<sup>12 13</sup> with techniques from grounded theory such as memoing, constant  
23  
24 190 comparison, and diagramming to enhance our understanding and facilitate the development of  
25  
26 191 higher themes<sup>14 15</sup>. Data collection and analysis ran concurrently to enable purposive sampling based  
27  
28 192 on analytic insights. Thorough line-by-line coding was undertaken in NVivo 10<sup>16</sup>, and a coding  
29  
30 193 manual was developed which evolved as more data were collected and coded. The emerging codes  
31  
32 194 were constantly checked against the raw data to ensure the analysis was driven by the participants'  
33  
34 195 own language and experiences.  
35  
36  
37

38 196 All data relating to burdens and benefits of managing BP were analysed. We also coded factors that  
39  
40 197 appeared to influence perceptions of burdens and benefits to facilitate an in-depth understanding of  
41  
42 198 how participants appraised the intervention's value. A broad and open definition was adopted  
43  
44 199 whereby benefits and burdens were defined as positive and negative outcomes or experiences of  
45  
46 200 engaging in the intervention<sup>17</sup>, in order to facilitate a comprehensive representation of all potentially  
47  
48 201 relevant data.  
49  
50

51 202  
52  
53  
54  
55  
56  
57  
58  
59  
60

1  
2  
3 **203 RESULTS**  
4  
5  
6

7 **204 Participant characteristics**  
8  
9

10 **205** In the intervention group, 28 of 54 invited participants agreed to be interviewed (52%). In the usual  
11  
12 **206** care group, 7 of 24 invited participants agreed (29%). Most participants who did not take part chose  
13  
14 **207** not to reply, but those who did said they did not have anything to report on the trial (n = 3 in usual  
15  
16 **208** care). The participants were from 19 different GP surgeries. Table 2 shows the sociodemographic  
17  
18 **209** and intervention details of the sample.  
19  
20

21  
22 **210**  
23

24 **211** Table 2. Sociodemographic and intervention participant data (n=35)  
25  
26

|                                      | Intervention participants | Usual care participants |
|--------------------------------------|---------------------------|-------------------------|
| N                                    | 28                        | 7                       |
| Median duration of interview (range) | 38 (15-67) minutes        | 28 (22-40) minutes      |
| Median age (range)                   | 70 (41-87) years          | 67 (52-77) years        |
| Gender                               | 71% female                | 43% female              |
| Ethnicity                            |                           |                         |
| White                                | 24                        | 6                       |
| Black African                        | 1                         |                         |
| Pakistani                            | 1                         |                         |
| Other                                | 2                         | 1                       |
| Education levels                     | 9 No formal education     | 2 No formal education   |
|                                      | 8 GCSE or A-level         | 3 GCSE or A-level       |

|                                                                                 |                     |                    |
|---------------------------------------------------------------------------------|---------------------|--------------------|
|                                                                                 | 10 Higher Education | 1 Higher Education |
|                                                                                 | 1 Other             | 1 Other            |
| Median number of weeks into the study at which the interview took place (range) | 20 (10-57) weeks    | 17 (7 to 24) weeks |
| Poorly controlled BP at the time of the interview                               | 10/28 (36%)         | N/A*               |
| Medication change recommended during the study                                  | 15/28 (54%)         | N/A                |
| Accessed optional healthy lifestyles session                                    | 15/28 (54%)         | N/A                |

212 \*As BP self-monitoring was a key component of the intervention, BP readings were available for the  
 213 intervention group throughout the duration of the study but data about BP from the usual care  
 214 group were only available at RCT baseline and follow-up points.

## 215 Themes

216 Table 3 presents seven themes exploring perceived burdens and benefits of the HOME BP  
 217 intervention. One meta-theme also emerged concerning how illness and treatment beliefs about  
 218 high BP appeared to influence participants' perceptions about the intervention's burdens and  
 219 benefits, and this is discussed in relation to each theme it applies to. Figure 1 shows how illness and  
 220 treatment perceptions about BP appeared to relate to the sub-themes identified by the thematic  
 221 analysis.

222

1  
2  
3  
4  
5  
6  
7  
8  
9  
10  
11  
12  
13  
14  
15  
16  
17  
18  
19  
20  
21  
22  
23  
24  
25  
26  
27  
28  
29  
30  
31  
32  
33  
34  
35  
36  
37  
38  
39  
40  
41  
42  
43  
44  
45  
46  
47  
48  
49  
50  
51  
52  
53  
54  
55  
56  
57  
58  
59  
60

223 Where quotes are included, participants are referred to as 'p' followed by a number. Study group  
224 (intervention or usual care) is also included to help understand the quotes in context.

For peer review only

225 Table 3. Themes and sub-themes relating to perceived burdens and benefits of the intervention

| Themes                                                             | Sub-themes                                       | Exemplar participant quote                                                                                                                                                                   |
|--------------------------------------------------------------------|--------------------------------------------------|----------------------------------------------------------------------------------------------------------------------------------------------------------------------------------------------|
| Benefit of reassurance from seeing BP readings                     | Reassurance when BP readings are well-controlled | "I'm so pleased. And my mind is at rest when we go on holidays and all that...I'm alright. I'm alright sort of thing. Yeah, peace of mind" (Intervention p9, well-controlled)                |
|                                                                    | Reassurance from keeping an eye on BP            | "It made me much more aware of what the problem is with the high blood pressure and by monitoring it so regularly, I know exactly where I stand with it" (Intervention p15, well-controlled) |
| Benefit of motivation for lifestyle change from seeing BP readings | Seeing BP readings motivated lifestyle change    | "It is quite interesting to see the effects of what I'm doing on the blood pressure and everything. So, I think that is – it is quite good" (Intervention p18, well-controlled)              |
| Benefit of better                                                  | Perceived health improvements                    | "It helped me to change my medication and then because of change of medication,                                                                                                              |

1  
2  
3  
4  
5  
6  
7  
8  
9  
10  
11  
12  
13  
14  
15  
16  
17  
18  
19  
20  
21  
22  
23  
24  
25  
26  
27  
28  
29  
30  
31  
32  
33  
34  
35  
36  
37  
38  
39  
40  
41  
42  
43  
44  
45  
46  
47

|                                            |                                                        |                                                                                                                                                                                                                                                                                                                                                 |
|--------------------------------------------|--------------------------------------------------------|-------------------------------------------------------------------------------------------------------------------------------------------------------------------------------------------------------------------------------------------------------------------------------------------------------------------------------------------------|
| health                                     | from medication changes                                | my blood pressure went down. So definitely there is a benefit" (Intervention p16, well-controlled)                                                                                                                                                                                                                                              |
|                                            | Intervention can facilitate management of side effects | "That medication didn't work, in that I was on holiday and my ankles swelled up so much – and my feet and my legs, so much so that I couldn't see my toes. So I stopped taking that medication. Was called back to the GP. And I'm now on a medication that works for me and is managing the blood pressure" (Intervention p7, well-controlled) |
| Burden of worrying about health            | Negative emotional responses to seeing high readings   | "I was actually quite shocked because it was a—a lot higher" (Intervention p6, poorly controlled)                                                                                                                                                                                                                                               |
|                                            | Worrying about medication change affecting health      | "I don't want to get more medication 'cause I'm already on a high dose and I don't want to increase it because it worries me about my kidneys" (Intervention p24, poorly controlled)                                                                                                                                                            |
| Burden of uncertainty from self-monitoring | Uncertainty about whether readings are representative  | "If someone only ever takes it in the morning, and you tend to get those lower readings, are you really getting a true picture of what they're like in the afternoon or the evening?" (Intervention p10, well-controlled)                                                                                                                       |

|                                                                     |                                                         |                                                                                                                                                                                                                                                                                          |
|---------------------------------------------------------------------|---------------------------------------------------------|------------------------------------------------------------------------------------------------------------------------------------------------------------------------------------------------------------------------------------------------------------------------------------------|
|                                                                     | Uncertainty about what to do about high or low readings | "I don't know what's going to happen in respect to that [amber feedback]. Whether I'm going to get a call from my GP, or whether he – so I'm a little bit, like, you know, in the air. I don't really know what's going to happen in that respect" (Intervention p22, poorly controlled) |
| Burden of thinking about making healthy lifestyle changes           | Worry or guilt about not engaging with healthy changes  | "I have looked at it [online healthy lifestyles session]. I wouldn't say I've looked at it seriously, and I need to" (Intervention p4, poorly controlled)                                                                                                                                |
| Burden of the practicalities of adhering to intervention procedures | Burden of fitting self-monitoring into the day          | "I like to get up and have a cup of coffee and I'm thinking 'Well, let's get the blood pressure done first because otherwise I can't do that, you know, for a while afterwards.' So, I've found that quite—quite difficult" (Intervention p5, poorly controlled).                        |

226

1  
2  
3  
4  
5  
6  
7  
8  
9  
10  
11  
12  
13  
14  
15  
16  
17  
18  
19  
20  
21  
22  
23  
24  
25  
26  
27  
28  
29  
30  
31  
32  
33  
34  
35  
36  
37  
38  
39  
40  
41  
42  
43  
44  
45  
46  
47

227

For peer review only



1  
2  
3  
4 228 Insert Figure 1 here  
5

6  
7 229 Benefit of reassurance from seeing BP readings  
8

9  
10 230 *Reassurance when BP readings are well-controlled*  
11

12  
13 231 Seeing well-controlled readings when self-monitoring BP gave participants peace of mind which was  
14

15 232 widely perceived as a benefit of the intervention. People described feeling relieved that their BP  
16

17 233 readings were lower than at the GP surgery, and felt this gave them more insight into what their BP  
18

19 234 was like most of the time.  
20

21  
22 235 “What I do like about it is taking the blood pressure here at home, the readings are lower. And I find  
23

24 236 that quite reassuring that my blood pressure is not always high” (Intervention p11, well-controlled)  
25

26  
27 237 Several usual care participants had decided to use their own BP monitors, and this group also  
28

29 238 described feeling reassurance when seeing their BP was well-controlled.  
30

31  
32 239 *Reassurance from keeping an eye on BP*  
33

34  
35 240 Most participants liked having an increased focus on their BP through regular monitoring and found  
36

37 241 it interesting to compare their readings over time. However one participant perceived that taking BP  
38

39 242 regularly could encourage too much attention on your health, which was a potential burden of the  
40

41 243 intervention for her (Intervention p28, BP control unknown as did not enter BP readings on HOME  
42

43 244 BP). This participant had low concern about her BP generally, and was not motivated to engage in  
44

45 245 self-management.  
46

47  
48 246 Even when participants had poorly-controlled readings, many felt a benefit from the intervention as  
49

50 247 it enabled them to regularly check their BP and detect any problems instantly rather than carrying  
51

52 248 on unaware.  
53  
54  
55  
56  
57  
58  
59  
60

1  
2  
3 249 "I think it's helping me to know where my blood pressure stands because it's a regular thing every  
4  
5 250 month" (Intervention p24, poorly-controlled)  
6  
7  
8 251 The knowledge that home readings were shared with the prescriber reassured participants as they  
9  
10 252 knew that any problems would not only be detected but also dealt with at the time, making them  
11  
12 253 feel well cared for. This contrasted with the perceived burden of managing BP in usual care where  
13  
14 254 some participants felt concerned that their GP did not change their medication when their home  
15  
16 255 readings were too high, or would have liked more regular contact with their GP surgery to check  
17  
18 256 their BP and medication.  
19  
20  
21 257 "It would be nice to have it checked, I guess, you know, every three months or whatever. How—  
22  
23 258 however often. I mean, how do they know that everything is working?" (Usual care p4).  
24  
25  
26 259 This shows that although participants in usual care gained reassurance from seeing low readings  
27  
28 260 when they monitored at home, the lack of interaction with the GP surgery could cause concern  
29  
30 261 when readings were high or when patients did not regularly monitor BP at home of their own accord.  
31  
32  
33 262  
34  
35  
36 263 Benefit of motivation for lifestyle change from seeing BP readings  
37  
38  
39 264 Some participants were motivated to increase their physical activity, engage in stress management  
40  
41 265 activities or healthy eating because they could see this had a positive impact on their BP readings.  
42  
43 266 This helped them feel more in control of their BP.  
44  
45  
46 267 "By taking the readings regularly and frequently, it gave me more of a feedback straightaway if you  
47  
48 268 like about anything, changes that I did make like a bit of exercise or...practicing relaxation and this  
49  
50 269 sort of thing. So that was quite nice, it was nice to feel that I was more in control of it again"  
51  
52 270 (Intervention p20, well-controlled)  
53  
54  
55  
56  
57  
58  
59  
60

1  
2  
3 271 Other participants felt frustrated after making lifestyle changes in the past which had no effect on  
4  
5 272 their BP. This made them feel that lifestyle was ineffective for controlling BP.  
6  
7  
8 273 “I’m a completely different person. My diet’s completely different. And my blood pressure remained  
9  
10 274 the same. So I’ve done literally everything you physically possibly can to help yourself, and nothing’s  
11  
12 275 worked” (Intervention p1, well-controlled).

13  
14  
15 276

16  
17  
18 277 Benefit of better health

19  
20  
21 278 *Perceived health improvements from medication changes*

22  
23  
24 279 Many participants felt it was beneficial to change their medication when their readings were too  
25  
26 280 high, and were very pleased when they perceived that a medication change led to lower BP readings  
27  
28 281 because of the positive effect this would have on their health.

29  
30  
31 282 “I’ve found that by having the medication changed up at regular intervals my blood pressure’s  
32  
33 283 improved all the time” (Intervention p15, well-controlled)

34  
35  
36 284 A few participants felt that a medication change had not been effective at lowering their BP which  
37  
38 285 could create doubt about their medication’s effectiveness.

39  
40  
41 286 “It’s been doubled but it hasn’t seemed to lower my blood pressure at all, in fact, it’s at the same  
42  
43 287 levels as it is sort of now, un-medicated. So I just think – I don’t think it’s the right one. You know, I  
44  
45 288 can take the tablet but, actually, I don’t think it’s doing anything”. (Intervention p26, poorly-  
46  
47 289 controlled)

48  
49  
50 290 *Intervention can facilitate management of side effects*

51  
52  
53 291 Most participants did not experience any side effects from having their medication changed. Where  
54  
55 292 side effects did occur, participants tended to perceive this as being a cost of taking medication

1  
2  
3 293 (which was balanced against the benefit of controlling BP), rather than a burden of the intervention  
4  
5 294 itself. They felt that the intervention could help them to be more aware of side effects, to identify  
6  
7 295 alternative medications and to monitor how these affect their health.  
8  
9

10 296 “That [side effect] would have happened, you know, no matter what. That would have been an issue  
11  
12 297 but this has actually highlighted it, sort of, more clearly” (Intervention p5, poorly-controlled)  
13  
14

15 298

16  
17  
18 299 Burden of worrying about health  
19  
20

21 300 *Negative emotional responses to seeing high readings*  
22  
23

24 301 A burden of self-monitoring BP for some people was that seeing high readings could cause worry  
25  
26 302 about health. Participants’ beliefs about their BP control appeared to influence their appraisal of  
27  
28 303 high readings. A few participants believed their BP was well-controlled, a belief which was perhaps  
29  
30 304 reinforced by clinical staff approving their readings previously, and had only joined the study to help  
31  
32 305 with research. These participants tended to feel shocked or annoyed when they received above-  
33  
34 306 target feedback from the intervention as this challenged their beliefs.  
35  
36

37 307 “At one time, I was told to go on medication, further medication, which I must admit I was not very  
38  
39 308 happy about... When I used to go for a check with the nurse, if I’d have had those particular readings,  
40  
41 309 they wouldn’t have been high” (Intervention p17, poorly controlled)  
42  
43

44  
45 310 Others were confused or frustrated by high BP readings when they could not understand why this  
46  
47 311 might have happened.  
48  
49

50 312 “I’m thinking about why my blood pressure has gone up. I can’t think why” (Intervention p25, poorly  
51  
52 313 controlled).  
53  
54

55 314  
56  
57  
58  
59  
60

1  
2  
3 315 Meanwhile people who expected to see high readings were less concerned because they had  
4  
5 316 accepted that high readings were likely.  
6  
7  
8 317 “Just par for the course. It’s what I expect from my blood pressure, really, so, it never worries me”  
9  
10 318 (Intervention p5, poorly controlled)  
11  
12  
13 319 Perceptions about the causes of high BP also influenced how anxious people felt about seeing high  
14  
15 320 readings. Those who felt that high readings held serious implications for their health tended to feel  
16  
17 321 frightened. Some even felt apprehensive *before* self-monitoring in case their readings were out-of-  
18  
19 322 range, as they didn't want to see evidence that their BP was too high or low.  
20  
21  
22 323 “Before I take my blood pressure, I do get stressed. I wouldn't say I get massively stressed because  
23  
24 324 obviously I'm used to doing it now but ... it's just that apprehension and thinking 'Oh, God, I hope it's  
25  
26 325 not too high today. I wonder really what's going on and how serious this is”. (Intervention p26,  
27  
28 326 poorly controlled).  
29  
30  
31 327 Other people were able to dismiss one-off high readings without feeling anxious as they attributed  
32  
33 328 high readings to less threatening explanations such as feeling stressed, not sitting still for long  
34  
35 329 enough, positioning of the cuff, or held a prior expectation of it being normal for BP to fluctuate. In  
36  
37 330 these cases, the high readings had less negative emotional impact as they were not interpreted as  
38  
39 331 indicating a serious underlying health issue.  
40  
41  
42  
43 332 *Worrying about medication change affecting health*  
44  
45  
46 333 Some participants were worried about the effects that changing BP medication could have on their  
47  
48 334 health. Previous experience of side effects, existence of co-morbidities, and concerns about  
49  
50 335 medication dependency or impact on kidneys tended to make participants feel more worried about  
51  
52 336 changing medication.  
53  
54  
55  
56  
57  
58  
59  
60

1  
2  
3 337 Perceptions about the health risk of high BP in terms of stroke and cardiovascular disease tended to  
4  
5 338 affect how burdensome participants perceived a medication change to be. Anxiety about future  
6  
7 339 health could override concerns about medication side effects or dependency as the behaviour was  
8  
9 340 evaluated as beneficial in order to bring BP down, although sometimes participants still experienced  
10  
11 341 conflict between the perceived benefit and burden.

12  
13  
14 342 “The blood pressure has gone down but now my worries have changed from blood pressure to other  
15  
16 343 things. One is actually depending on medicine whole of my life. And secondly impact of medicine  
17  
18 344 on my body like kidneys” (Intervention p16, well-controlled).

19  
20  
21 345

22  
23  
24 346 Burden of uncertainty from self-monitoring

25  
26  
27 347 *Uncertainty about whether readings are representative*

28  
29  
30 348 Whilst some participants were confident making decisions about when to monitor their BP, others  
31  
32 349 were worried about whether their readings were representative, especially when BP was seen to  
33  
34 350 vary at different times of day or after physical activity or drinking coffee. This could lead to doubt  
35  
36 351 about the meaningfulness of self-monitoring and the recommendations of the intervention.

37  
38  
39 352 “I wonder if maybe the time of day I’m doing it, maybe my blood pressure’s always gonna be roughly  
40  
41 353 that. And could it be different during the day, is the sort of thing that does play in my mind a bit”  
42  
43 354 (Intervention p1, well controlled).

44  
45  
46 355 *Uncertainty about what to do about high or low readings*

47  
48  
49  
50 356 Uncertainty could also become a burden after seeing an out-of-range BP reading, as the participant  
51  
52 357 had to decide what to do next. This burden was removed when the prescriber provided quick,  
53  
54 358 personalised feedback to the participant, but when they did not receive any contact from their

1  
2  
3 359 prescriber or felt the prescriber was not available to provide support, this could create a feeling of  
4  
5 360 doubt.

6  
7  
8 361 "I suppose I knew there was nothing to worry about but it's always a bit of a niggle in the back of  
9  
10 362 your mind... even the days she's [the nurse prescriber] at work I can't ring her at work because she  
11  
12 363 may be, you know, doing something else" (Intervention p21, well-controlled)

13  
14  
15 364

16  
17  
18 365 Burden of thinking about making healthy lifestyle changes

19  
20  
21 366 *Worry or guilt about not engaging with healthy changes*

22  
23  
24 367 Several participants felt they would like to lose weight, eat more healthily, or do more physical  
25  
26 368 activity but lacked the motivation or self-efficacy to make these changes, especially if they had other  
27  
28 369 co-morbidities. This could create feelings of guilt or worry about their failure to make healthy  
29  
30 370 changes, which was a burden of the intervention for them.

31  
32  
33 371 "I understand that, obviously, I need to get my blood pressure down because it is very dangerously  
34  
35 372 high, but I just don't know what to do about it, you know?... where I feel fatigued and worn out, I  
36  
37 373 don't feel well enough at the moment to do any exercise" (Intervention p26, poorly controlled)

38  
39  
40  
41 374

42  
43  
44 375 Burden of the practicalities of adhering to intervention procedures

45  
46  
47 376 *Burden of fitting self-monitoring into the day*

48  
49  
50 377 Many participants felt that self-monitoring was easy to fit into their day, and some described this as  
51  
52 378 being easier than going to the GP surgery to have their BP taken. Those with busy daily lifestyles  
53  
54 379 tended to find it harder to remember to self-monitor, and a burden for some participants was

1  
2  
3 380 deciding how best to fit self-monitoring into their routine given the instructions about not drinking

4  
5 381 coffee or exercising beforehand.  
6  
7

8 382 The perceived burden of regular self-monitoring seemed to be mitigated by the perceived benefit of

9  
10 383 the behaviour, such that those who felt reassurance from seeing low readings or with high

11  
12 384 motivation to control BP found it less hassle and easier to remember than those who felt anxious

13  
14 385 about self-monitoring or had only joined the study to help with research.  
15  
16

17 386 "There was no big deal. It doesn't take long and it's—it's quite nice to sit down and have a relax

18  
19 387 during the day" (Intervention p8, well-controlled)  
20  
21

22 388  
23  
24  
25  
26  
27  
28  
29  
30  
31  
32  
33  
34  
35  
36  
37  
38  
39  
40  
41  
42  
43  
44  
45  
46  
47  
48  
49  
50  
51  
52  
53  
54  
55  
56  
57  
58  
59  
60



## 389 DISCUSSION

390 This qualitative study has identified diverse perceived burdens and benefits of using a self-  
391 management digital intervention for high BP. In support of the BoT theory<sup>1</sup>, the HOME BP  
392 intervention appeared to reduce the burden on patients to self-manage their condition by improving  
393 access to regular HCP support and facilitating better understanding of their condition, but in some  
394 cases there was a burden of worry about health or changing medication. How much benefit a  
395 patient perceived from the intervention compared to burden seemed to be influenced by the  
396 dynamics of the patient-HCP interaction (described as ‘Improving Cooperation’ in BoT theory) and  
397 the patient’s own resources to manage their condition and cope with medication (described as  
398 “Capacity”).

399 Another important factor relating to the burden experienced was personal beliefs about BP and  
400 treatment. Those who recognised that their BP was too high and did not have concerns about side  
401 effects or taking medication appeared to have more positive experiences of the intervention,  
402 perceiving self-monitoring as more worthwhile, and feeling less anxious about seeing high readings  
403 or changing medication. This is consistent with the necessity-concerns framework<sup>18</sup>. BoT theory  
404 states that people who are better equipped with resources and are more resilient may cope better  
405 with the burden imposed by healthcare<sup>19</sup>, but the importance of an individual’s personal  
406 conceptualisation of their condition in how burdensome they find self-care is not strongly  
407 represented. This beliefs system may be partly encompassed by the “Relational Integration” aspect  
408 of BoT theory, which refers to the extent to which patients trust the tasks they do for healthcare, e.g.  
409 self-monitoring BP, and feel confident in the outcomes of these tasks, e.g. changing medication.

410 However illness and treatment perceptions<sup>20</sup> are not explicitly covered by the theory and it may be  
411 helpful to consider them as additional factors which might influence the experience of treatment  
412 burden.

1  
2  
3 413  
4  
56 414 **Implications for measurement of benefit and burden**  
7

8  
9 415 The present study demonstrates the value of collecting in-depth qualitative data to develop a  
10  
11 416 detailed understanding of the burden of treatment, and to discover perceptions specific to the  
12  
13 417 context in which the intervention was implemented. The important psychosocial outcomes  
14  
15 418 discovered using qualitative research can inform the selection or development of relevant  
16  
17 419 quantitative measures to capture these factors in further evaluation.  
18  
19

20 420 Quantitative measures have been developed to appraise the structural aspects of burden of  
21  
22 421 treatment<sup>21,22</sup>, but these are not intended to assess psychosocial factors such as reassurance, anxiety  
23  
24 422 or uncertainty which this study suggests can influence the extent to which using an intervention is  
25  
26 423 experienced subjectively as a burden.  
27  
28

29 424 Future research could explore how best to capture the perceived burden or benefit of an  
30  
31 425 intervention. One approach might be to simply ask participants to quantify the net subjective burden  
32  
33 426 or benefit of interventions. However, it could be challenging for participants to weigh complex  
34  
35 427 heterogeneous psychosocial outcomes against one another and decide overall whether an  
36  
37 428 intervention was more burdensome or beneficial. Capturing the extent to which patients experience  
38  
39 429 positive or negative psychosocial outcomes might better assess how beneficial or burdensome the  
40  
41 430 intervention was perceived to be. Although this would not produce a single outcome measure, cost-  
42  
43 431 consequence analysis can be used to inform decision-making when an intervention has multiple  
44  
45 432 relevant outcomes which cannot be aggregated into one value<sup>23</sup>. Coast<sup>24</sup> discusses whether a  
46  
47 433 multidimensional approach is more informative for economic analysis or if a single aggregated value  
48  
49 434 is more pragmatic.  
50  
51  
52

53 435 Extending the evaluation of outcomes beyond health is in line with the capability approach<sup>25</sup>, which  
54  
55 436 focuses on broader aspects of subjective well-being which are not assessed by generic measures  
56  
57  
58  
59  
60

1  
2  
3 437 such as the EQ-5D<sup>26</sup>. Tools used to capture perceived capability (such as the ICECAP<sup>27</sup>, and ASCOT<sup>28</sup>)  
4  
5 438 are gaining support as holistic measures of economic evaluation, but do not assess the more specific  
6  
7 439 psychosocial burdens and benefits of healthcare raised by participants in this study. Process utility  
8  
9 440 emphasises the need to quantitatively measure the value that people attach to healthcare delivery.  
10  
11 441 This approach might be relevant for evaluating how much value people perceive in the process of  
12  
13 442 using digital health interventions and the capability this achieves<sup>29</sup>. It has been argued that process  
14  
15 443 utility measures should also ask about the reasons behind patients' valuations, to better inform the  
16  
17 444 decision-maker<sup>30</sup>. This would help to capture the individual differences found in this study in how  
18  
19 445 people appraise the personal value of a digital intervention, informed by their underlying illness and  
20  
21 446 treatment beliefs.  
22  
23  
24

#### 25 447 **Strengths and limitations**

26  
27  
28 448 A strength of the study was that we used relatively open questions formulated by a multi-  
29  
30 449 disciplinary team which enabled us to elicit and explore a wide range of perceived burdens and  
31  
32 450 benefits, some of which were not anticipated at the outset of research. We are aware of the lead  
33  
34 451 researcher's potential influence on the data analysis, which we strived to minimise by transparent  
35  
36 452 memoing of decisions and regular team meetings to discuss the emerging themes. Participants were  
37  
38 453 sent newsletters to describe the findings of the study, but were not invited to provide feedback on  
39  
40 454 the analysis.  
41  
42  
43

44 455 We succeeded in speaking to well and poorly controlled hypertensive participants at different points  
45  
46 456 in the intervention, and there was a wide range of demographics in terms of age, education level  
47  
48 457 and gender in the sample. However, the uptake rate from those invited to interviews was not high,  
49  
50 458 particularly in the usual care group. Perhaps unsurprisingly, it was difficult to recruit low engagers in  
51  
52 459 the intervention group, which could have helped reach theoretical saturation. In terms of wider  
53  
54 460 applicability, we are aware that these findings may not be generalisable across other health  
55  
56  
57  
58  
59  
60

1  
2  
3 461 conditions, as the lack of symptoms in hypertension and the stepped pathway for changing  
4  
5 462 medication are quite unique features of this condition.  
6  
7  
8 463  
9  
10 464 Repeated interviews with the same participants may have offered more insight into the dynamic  
11  
12 465 nature of perceived burdens and benefits over time, although more regular conversations about the  
13  
14 466 target behaviour could have influenced participants' BP management behaviour therefore  
15  
16 467 threatening the RCT conclusions. It has been noted that a key issue with process evaluations of  
17  
18 468 interventions is the tendency for intervention content and impact to change over time<sup>7</sup>, such that  
19  
20 469 deciding the optimal point to collect evaluation data is challenging.  
21  
22  
23  
24 470 Some of the burdens and benefits described by patients in this study were also found to a lesser  
25  
26 471 extent in the qualitative development of the HOME BP intervention, such as reassurance from seeing  
27  
28 472 well-controlled readings, and some concerns about side effects and high or variable readings<sup>31</sup>.  
29  
30 473 Others were novel and only arose when participants experienced the full HOME BP intervention  
31  
32 474 during the RCT as opposed to a prototype, for example the perceived health improvements from  
33  
34 475 medication changes. This demonstrates the value of conducting inductive qualitative research to  
35  
36 476 explore users' perspectives at each stage of intervention development and evaluation, in line with  
37  
38 477 the person-based approach<sup>9</sup>.  
39  
40  
41

## 42 478 **CONCLUSIONS**

43  
44  
45  
46 479 In the context of this digital intervention, the study shows that participants' appraisal of burdens and  
47  
48 480 benefits appeared to be influenced by both intervention factors, such as BP readings and perceived  
49  
50 481 availability of the healthcare professional, and patient characteristics, such as perceptions of BP  
51  
52 482 control, previous experience of side effects, and co-morbidities. This nuanced evaluation would be  
53  
54 483 lost in a population-level analysis, demonstrating the advantage of a more individualised approach  
55  
56  
57  
58  
59  
60

1  
2  
3 484 for better understanding participants' perspectives of an intervention and how best to minimise the  
4  
5 485 burden of treatment.  
6  
7

8 486 The study develops the recommendations of McNamee et al<sup>6</sup> that complex digital health  
9  
10 487 interventions warrant a wider perspective for measuring health outcomes, and discusses the  
11  
12 488 implications of capturing broader psychosocial outcomes for Burden of Treatment theory and health  
13  
14 489 economic evaluations.  
15  
16

17 490 The finding that some participants perceived personal benefits from using the intervention  
18  
19 491 demonstrates that the process of healthcare can, in itself, be positive for some people, highlighting  
20  
21 492 the importance of capturing transient short-term benefits to take these into account as well as the  
22  
23 493 burden of self-management.  
24  
25

26 494  
27

28  
29 495  
30

31 496  
32  
33  
34  
35  
36  
37  
38  
39  
40  
41  
42  
43  
44  
45  
46  
47  
48  
49  
50  
51  
52  
53  
54  
55  
56  
57  
58  
59  
60

1  
2  
3 497 **CONTRIBUTORS**  
4  
5

6 498 KM recruited participants, conducted interviews, analysed data, and wrote manuscript. LD & KB  
7  
8 499 contributed to study design and data analysis. KB and RB developed the digital intervention. PL &  
9  
10 500 RJM contributed to intervention development and interpretation of themes. CM & JR contributed to  
11  
12 501 theoretical and methodological implications of the study findings. LY contributed to study design,  
13  
14 502 data collection, data analysis, and interpretation.  
15  
16  
17 503 All authors contributed to the manuscript preparation and provided final approval of the version to  
18  
19 504 be published.  
20  
21

22  
23 505• **ACKNOWLEDGEMENTS**  
24

25 506• We would like to thank all the participants who took part in this research, and the PPI who helped in  
26  
27 507 the design and conduct of the research.  
28

29  
30 508• **FUNDING**  
31

32  
33 509 This independent research was funded by the National Institute for Health Research (NIHR)  
34  
35 510 Programme Grants for Applied Research Programme (Grant Reference Number RP-PG-1211-20001).  
36  
37 511 The views expressed are those of the author(s) and not necessarily those of the NHS, the NIHR, or  
38  
39 512 the Department of Health. RJM is funded by an NIHR Professorship (NIHR-RP-R2-12-015) and the  
40  
41 513 NIHR Oxford CLAHRC.  
42  
43

44  
45 514• **COMPETING INTERESTS**  
46

47  
48 515 RJM has received BP monitors for research purposes from Omron and Lloyds Pharmacies.  
49

50  
51 516• **ETHICS APPROVAL**  
52

53 517• This qualitative process study was embedded in the HOME BP trial and approved by the University of  
54  
55 518 Southampton and NHS Hampshire A Research Ethics committees (REC Reference 15/SC/0082).  
56  
57

1  
2  
3 519 **DATA SHARING STATEMENT**  
4  
5

6 520 Requests for data sharing can be sent to the corresponding author. Full transcripts of interviews are  
7  
8 521 not available to protect participants' anonymity.  
9

10  
11 522

12  
13 523 **Figure legend:**

14 524 Figure 1 Possible influences of illness and treatment beliefs on perceived burdens and benefits of the  
15  
16 525 intervention  
17

18  
19 526  
20  
21  
22  
23  
24  
25  
26  
27  
28  
29  
30  
31  
32  
33  
34  
35  
36  
37  
38  
39  
40  
41  
42  
43  
44  
45  
46  
47  
48  
49  
50  
51  
52  
53  
54  
55  
56  
57  
58  
59  
60

## 527 REFERENCES

- 528 1. May CR, Eton DT, Boehmer K, et al. Rethinking the patient: using Burden of  
529 Treatment Theory to understand the changing dynamics of illness. *BMC*  
530 *Health Serv Res* 2014;**14**(1):281.
- 531 2. Eton DT, de Oliveira DR, Egginton JS, et al. Building a measurement framework of  
532 burden of treatment in complex patients with chronic conditions: a  
533 qualitative study. *Patient Relat Outcome Meas* 2012;**3**:39.
- 534 3. Gallacher K, May CR, Montori VM, et al. Understanding patients' experiences of  
535 treatment burden in chronic heart failure using normalization process theory.  
536 *Ann Fam Med* 2011;**9**(3):235–43.
- 537 4. Sanders GD, Neumann PJ, Basu A, et al. Recommendations for conduct,  
538 methodological practices, and reporting of cost–effectiveness analyses:  
539 second panel on cost–effectiveness in health and medicine. *JAMA*  
540 2016;**316**(10):1093–103.
- 541 5. Ioannidis JP, Garber AM. Individualized cost–effectiveness analysis. *PLoS Med*  
542 2011;**8**(7):e1001058.
- 543 6. McNamee P, Murray E, Kelly MP, et al. Designing and undertaking a health  
544 economics study of digital health interventions. *Am J Prev Med*  
545 2016;**51**(5):852–60.
- 546 7. Moore GF, Audrey S, Barker M, et al. Process evaluation of complex interventions:  
547 Medical Research Council guidance. *BMJ* 2015;**350**:h1258.
- 548 8. Band R, Morton K, Stuart B, et al. Home and Online Management and Evaluation  
549 of Blood Pressure (HOME BP) digital intervention for self–management of  
550 uncontrolled, essential hypertension: a protocol for the randomised  
551 controlled HOME BP trial. *BMJ open* 2016;**6**(11):e012684.
- 552 9. Yardley L, Morrison L, Bradbury K, et al. The person–based approach to  
553 intervention development: application to digital health–related behavior  
554 change interventions. *J Med Internet Res* 2015;**17**(1).
- 555 10. Tong A, Sainsbury P, Craig J. Consolidated criteria for reporting qualitative  
556 research (COREQ): a 32–item checklist for interviews and focus groups. *Int J*  
557 *Qual Health Care* 2007;**19**(6):349–57.



- 1  
2  
3  
4 558 11. Band R, Bradbury K, Morton K, et al. Intervention planning for a digital  
5 559 intervention for self-management of hypertension: a theory-, evidence- and  
6 560 person-based approach. *Implementation Science* 2017;**12**(1):25.  
7
- 8 561 12. Braun V, Clarke V. Using thematic analysis in psychology. *Qual Res Psychol*  
9 562 2006;**3**(2):77–101.  
10
- 11 563 13. Marks DF, Yardley L. *Research methods for clinical and health psychology*. Sage,  
12 564 2004.  
13
- 14  
15 565 14. Strauss A, Corbin JM. *Grounded theory in practice*: Sage, 1997.  
16
- 17 566 15. Charmaz K. *Constructing grounded theory*. Sage, 2014.  
18
- 19 567 16. NVivo qualitative data analysis Software [program], 2012.  
20
- 21 568 17. Rogers PJ, Stevens K, Boymal J. Qualitative cost-benefit evaluation of complex,  
22 569 emergent programs. *Eval Program Plann* 2009;**32**(1):83–90.  
23
- 24  
25 570 18. Horne R, Weinman J. Patients' beliefs about prescribed medicines and their role  
26 571 in adherence to treatment in chronic physical illness. *J Psychosom Res*  
27 572 1999;**47**(6):555–67.  
28
- 29  
30 573 19. Mair FS, May CR. Thinking about the burden of treatment. *Br Med J*  
31 574 2014;**349**:g6680.  
32
- 33 575 20. Leventhal H, Diefenbach M, Leventhal EA. Illness cognition: using common  
34 576 sense to understand treatment adherence and affect cognition interactions.  
35 577 *Cognit Ther Res* 1992;**16**(2):143–63.  
36
- 37  
38 578 21. Eton DT, Yost KJ, Lai J-s, et al. Development and validation of the Patient  
39 579 Experience with Treatment and Self-management (PETS): a patient-reported  
40 580 measure of treatment burden. *Qual Life Res* 2017;**26**(2):489–503.  
41
- 42 581 22. Tran V-T, Harrington M, Montori VM, et al. Adaptation and validation of the  
43 582 Treatment Burden Questionnaire (TBQ) in English using an internet platform.  
44 583 *BMC Med* 2014;**12**(1):109.  
45
- 46  
47 584 23. NICE. Incorporating economic evaluation. 2014.  
48 585 [https://www.nice.org.uk/process/pmg20/chapter/incorporating-economic-](https://www.nice.org.uk/process/pmg20/chapter/incorporating-economic-evaluation.12th)  
49 586 [evaluation.12th](https://www.nice.org.uk/process/pmg20/chapter/incorporating-economic-evaluation.12th) July 2017  
50
- 51  
52 587 24. Coast J, Kinghorn P, Mitchell P. The development of capability measures in  
53 588 health economics: opportunities, challenges and progress. *Patient*  
54 589 2015;**8**(2):119–26.  
55  
56  
57  
58  
59

- 1  
2  
3 590 25. Nussbaum M, Sen A. *The quality of life*: Clarendon Press – Oxford, 1993.  
4  
5 591 26. Brazier J, Ratcliffe J, Saloman J, et al. *Measuring and valuing health benefits for*  
6 592 *economic evaluation*: OXFORD university press, 2017.  
7  
8  
9 593 27. Al-Janabi H, Flynn TN, Coast J. Development of a self-report measure of  
10 594 capability wellbeing for adults: the ICECAP-A. *Qual Life Res* 2012;**21**(1):167-  
11 595 76.  
12  
13  
14 596 28. Netten A, Burge P, Malley J, et al. Outcomes of social care for adults: developing  
15 597 a preference-weighted measure. *Health Technol Assess* 2012;**16**(16).  
16  
17 598 29. Ryan M, Kinghorn P, Entwistle VA, et al. Valuing patients' experiences of  
18 599 healthcare processes: Towards broader applications of existing methods. *Soc*  
19 600 *Sci Med* 2014;**106**:194-203.  
20  
21  
22 601 30. Donaldson C, Shackley P. Does “process utility” exist? A case study of  
23 602 willingness to pay for laparoscopic cholecystectomy. *Soc Sci Med*  
24 603 1997;**44**(5):699-707.  
25  
26  
27 604 31. Bradbury K, Morton K, Grist R, et al. Using the Person-Based Approach to  
28 605 optimise a digital intervention for the management of hypertension. *In*  
29 606 *submission* 2017.  
30  
31 607

1  
2  
3  
4  
5  
6  
7  
8  
9  
10  
11  
12  
13  
14  
15  
16  
17  
18  
19  
20  
21  
22  
23  
24  
25  
26  
27  
28  
29  
30  
31  
32  
33  
34  
35  
36  
37  
38  
39  
40  
41  
42  
43  
44  
45  
46  
47

For peer review only

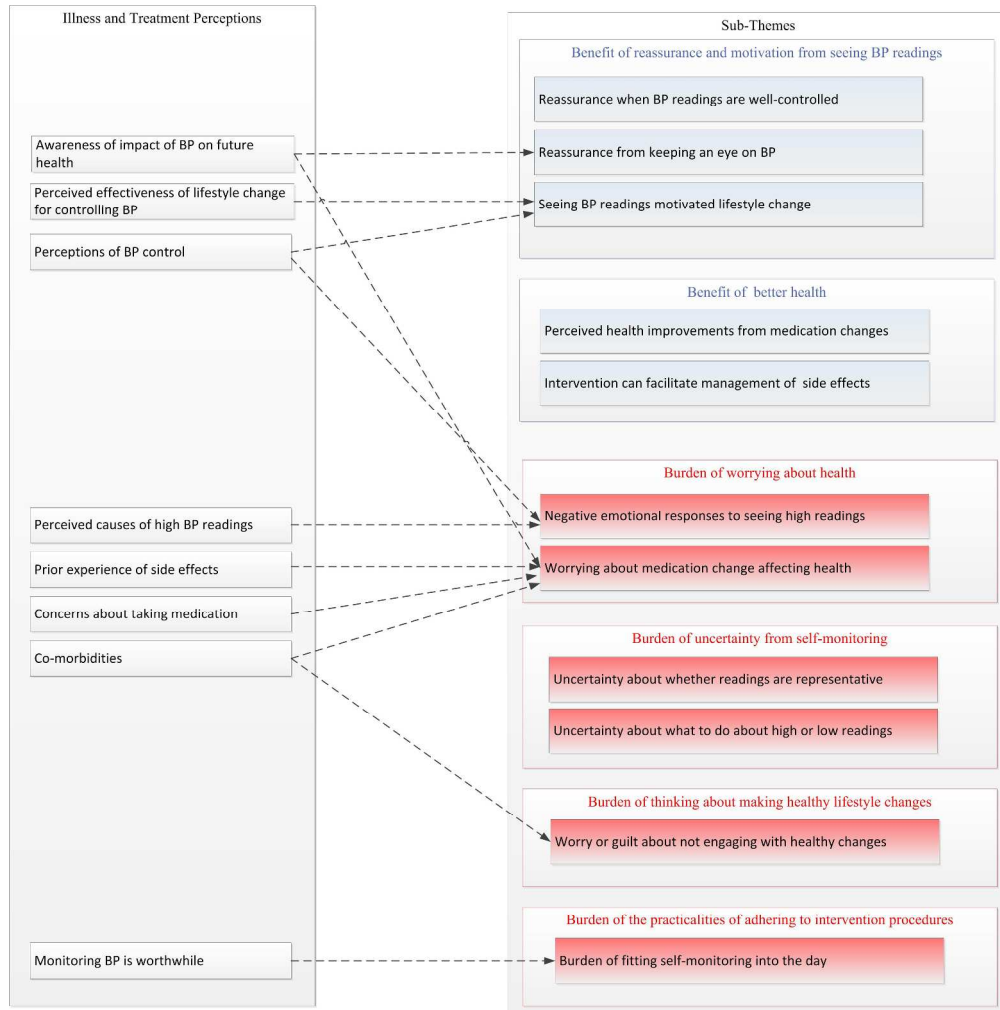

Figure 1. Possible influences of illness and treatment beliefs on perceived burdens and benefits of the intervention

337x340mm (300 x 300 DPI)

## Consolidated criteria for reporting qualitative studies (COREQ): 32-item checklist

Developed from:

Tong A, Sainsbury P, Craig J. Consolidated criteria for reporting qualitative research (COREQ): a 32-item checklist for interviews and focus groups. *International Journal for Quality in Health Care*. 2007. Volume 19, Number 6: pp. 349 – 357

**YOU MUST PROVIDE A RESPONSE FOR ALL ITEMS. ENTER N/A IF NOT APPLICABLE**

| No. Item                                       | Guide questions/description                                                                                                                              | Reported on Page # |
|------------------------------------------------|----------------------------------------------------------------------------------------------------------------------------------------------------------|--------------------|
| <b>Domain 1: Research team and reflexivity</b> |                                                                                                                                                          |                    |
| <i>Personal Characteristics</i>                |                                                                                                                                                          |                    |
| 1. Interviewer/facilitator                     | Which author/s conducted the interview or focus group?                                                                                                   | Page 9             |
| 2. Credentials                                 | What were the researcher's credentials?<br>E.g. PhD, MD                                                                                                  | Page 9             |
| 3. Occupation                                  | What was their occupation at the time of the study?                                                                                                      | Page 9             |
| 4. Gender                                      | Was the researcher male or female?                                                                                                                       | Page 9             |
| 5. Experience and training                     | What experience or training did the researcher have?                                                                                                     | Page 9             |
| <i>Relationship with participants</i>          |                                                                                                                                                          |                    |
| 6. Relationship established                    | Was a relationship established prior to study commencement?                                                                                              | N/A                |
| 7. Participant knowledge of the interviewer    | What did the participants know about the researcher? e.g. personal goals, reasons for doing the research                                                 | N/A                |
| 8. Interviewer characteristics                 | What characteristics were reported about the interviewer/facilitator? e.g. Bias, assumptions, reasons and interests in the research topic                | Page 9             |
| <b>Domain 2: study design</b>                  |                                                                                                                                                          |                    |
| <i>Theoretical framework</i>                   |                                                                                                                                                          |                    |
| 9. Methodological orientation and Theory       | What methodological orientation was stated to underpin the study? e.g. grounded theory, discourse analysis, ethnography, phenomenology, content analysis | Page 9             |
| <i>Participant selection</i>                   |                                                                                                                                                          |                    |
| 10. Sampling                                   | How were participants selected? e.g. purposive, convenience, consecutive, snowball                                                                       | Page 8             |
| 11. Method of approach                         | How were participants approached? e.g. face-to-face, telephone, mail, email                                                                              | Page 8             |

|                                        |                                                                                                                                 |                    |
|----------------------------------------|---------------------------------------------------------------------------------------------------------------------------------|--------------------|
| 12. Sample size                        | How many participants were in the study?                                                                                        | Page 10            |
| 13. Non-participation                  | How many people refused to participate or dropped out? Reasons?                                                                 | Page 10            |
| <i>Setting</i>                         |                                                                                                                                 |                    |
| 14. Setting of data collection         | Where was the data collected? e.g. home, clinic, workplace                                                                      | Page 8             |
| 15. Presence of non-participants       | Was anyone else present besides the participants and researchers?                                                               | N/A                |
| 16. Description of sample              | What are the important characteristics of the sample? e.g. demographic data, date                                               | Page 11            |
| <i>Data collection</i>                 |                                                                                                                                 |                    |
| 17. Interview guide                    | Were questions, prompts, guides provided by the authors? Was it pilot tested?                                                   | Page 9             |
| 18. Repeat interviews                  | Were repeat inter views carried out? If yes, how many?                                                                          | N/A                |
| 19. Audio/visual recording             | Did the research use audio or visual recording to collect the data?                                                             | Page 9             |
| 20. Field notes                        | Were field notes made during and/or after the interview or focus group?                                                         | Page 9             |
| 21. Duration                           | What was the duration of the inter views or focus group?                                                                        | Page 11            |
| 22. Data saturation                    | Was data saturation discussed?                                                                                                  | Page 9             |
| 23. Transcripts returned               | Were transcripts returned to participants for comment and/or correction?                                                        | N/A                |
| <b>Domain 3: analysis and findings</b> |                                                                                                                                 |                    |
| <i>Data analysis</i>                   |                                                                                                                                 |                    |
| 24. Number of data coders              | How many data coders coded the data?                                                                                            | Page 9             |
| 25. Description of the coding tree     | Did authors provide a description of the coding tree?                                                                           | Page 13            |
| 26. Derivation of themes               | Were themes identified in advance or derived from the data?                                                                     | Page 9-10          |
| 27. Software                           | What software, if applicable, was used to manage the data?                                                                      | Page 10            |
| 28. Participant checking               | Did participants provide feedback on the findings?                                                                              | Page 26            |
| <i>Reporting</i>                       |                                                                                                                                 |                    |
| 29. Quotations presented               | Were participant quotations presented to illustrate the themes/findings? Was each quotation identified? e.g. participant number | Throughout results |
| 30. Data and findings consistent       | Was there consistency between the data presented and the findings?                                                              | Yes                |
| 31. Clarity of major themes            | Were major themes clearly presented in the findings?                                                                            | Yes                |
| 32. Clarity of minor themes            | Is there a description of diverse cases or discussion of minor themes?                                                          | Yes                |

1  
2  
3  
4 **Once you have completed this checklist, please save a copy and upload it as part**  
5 **of your submission. When requested to do so as part of the upload process,**  
6 **please select the file type: *Checklist*. You will NOT be able to proceed with**  
7 **submission unless the checklist has been uploaded. Please DO NOT include this**  
8 **checklist as part of the main manuscript document. It must be uploaded as a**  
9 **separate file.**  
10  
11  
12  
13  
14  
15  
16  
17  
18  
19  
20  
21  
22  
23  
24  
25  
26  
27  
28  
29  
30  
31  
32  
33  
34  
35  
36  
37  
38  
39  
40  
41  
42  
43  
44  
45  
46  
47  
48  
49  
50  
51  
52  
53  
54  
55  
56  
57  
58  
59  
60

For peer review only

1  
2  
3  
4 **Supplementary File 2. Interview schedules for intervention and usual care group**  
5  
6

7 Intervention group interview schedule  
8  
9

10 **Opening questions**  
11

12 Can you tell me about what it is like for you to have high blood pressure?  
13

14 How did you feel when you were first told you had high blood pressure?  
15

16 Can you tell me why you decided to sign up for the Home BP study?  
17

18 I'm really interested in hearing about your experiences of using HOME BP, can you tell me all about  
19 it?  
20  
21  
22

23 Can you tell me about anything that you have liked about the HOME BP study so far?  
24  
25

26 Can you tell me about anything that you have disliked?  
27  
28

29 Can you tell me about any advantages of using HOME BP?  
30  
31

32 And can you tell me about any disadvantages of using HOME BP?  
33  
34

35 How do you feel about your high blood pressure now?  
36  
37

38 Do you think you would choose to keep on using the HOME BP programme if it was still available  
39 after a year?  
40  
41  
42

43 Why/ Why not?  
44  
45  
46

47 Would you recommend the HOME BP programme to other people with high blood pressure?  
48  
49

50 **Self-monitoring**  
51

52 **Experiences of monitoring:**  
53

54 Can you tell me about what it was like when you were learning how to use your BP monitor at home?  
55  
56

57 Can you tell me about the first time you used your BP monitor at home in the study?  
58  
59  
60



1  
2  
3 Can you tell me about what it has been like to monitor your blood pressure yourself?  
4

5 How did it make you feel?  
6

7 Had you ever monitored your own blood pressure before you took part in the HOME BP study?  
8

9  
10 *If yes:*

11 Can you tell me a bit more about this?  
12

13 Can you tell me whether you've noticed any changes in how you monitor your blood  
14  
15  
16  
17  
18  
19  
20  
21  
22  
23  
24  
25  
26  
27  
28  
29  
30  
31  
32  
33  
34  
35  
36  
37  
38  
39  
40  
41  
42  
43  
44  
45  
46  
47  
48  
49  
50  
51  
52  
53  
54  
55  
56  
57  
58  
59  
60  
pressure since you've started the HOME BP programme?

All: Can you tell me about any concerns that you have about monitoring your blood pressure?

Adherence to the monitoring schedule:

The HOME BP programme reminds you to monitor your blood pressure for 7 days every 4 weeks.

Can you tell me about what it has been like for you to try and monitor your blood pressure for 7 days every 4 weeks?

Can you tell me about the time of day you have been monitoring your blood pressure so far?

How do you feel about the instructions HOME BP gives about when to monitor?

Was there anything that helped you to monitor your own blood pressure?

Was there anything that made it harder to monitor your own blood pressure?

Can you tell me about any time when you had to skip your blood pressure monitoring or change when you did it in the day?

Can you tell me how you found it entering your readings on the HOME BP programme?

1  
2  
3 Feedback messages  
4  
5

6 Remember after you enter your readings on HOME BP, you see a message which says 'your readings  
7 were amber, or green'? What did you think about these messages?  
8  
9

10  
11 Can you tell me about how you felt when you saw a message about your blood pressure readings on  
12 HOME BP?  
13  
14

15  
16 How did you feel about monitoring your own blood pressure after reading that message?  
17  
18

19  
20 Did you have any very high or very low readings (red/blue) when you were monitoring in the HOME  
21 BP study? How did you feel?  
22  
23  
24

25 **2. Medication change**  
26  
27

28 Can you tell me about what it's like for you taking medication for your high blood pressure?  
29  
30

31 Have you been recommended to make a medication change during the HOME BP study?  
32  
33

34 *If yes:*  
35  
36

37 How did you feel about making a change to your medication when HOME BP recommended  
38 it?  
39  
40

41  
42 Did you make this change to your medication?  
43  
44  
45

46 ***If they chose to make a change:***  
47  
48

49 Can you tell me about what it was like to make a medication change in the HOME BP study?  
50  
51

52 Can you tell me about how the medication change came about?  
53  
54

55 How did you get on with your new medication?  
56  
57

58 How would you feel if HOME BP recommended a medication change for you now?  
59  
60

1  
2  
3 ***If they chose not to make a change –***  
4

5  
6 Can you tell me about why you decided not to change your medication?  
7

8  
9 How would you feel if HOME BP recommended another medication change for you now?  
10

11  
12 ***If no:***  
13

14  
15 *If patient has **not** been recommended a med change:* How do you feel about changing your  
16 medication if your blood pressure stayed too high for too long?  
17

18  
19 Can you tell me about any concerns that you have about doing this?  
20

21  
22 ***All:***  
23

24  
25 How did you feel about making changes to your medication before you took part in HOME BP?  
26  
27

28  
29 **3. HCP support**  
30

31  
32 Can you tell me about the contact you have had with your GP or nurse so far in the HOME BP study?  
33

34  
35 Can you tell me about how you have found the support from your GP or nurse while you were taking  
36 part in the HOME BP study?  
37

38  
39 Can you tell me what you thought about receiving emails from your nurse about HOME BP?  
40

41  
42 If needed, follow-up questions:  
43

44  
45 Have you seen your GP about your blood pressure since the start of the study?  
46

47  
48 And what about appointments with the nurse?  
49

50  
51 Can you tell me about how you have found the emails from HOME BP?  
52

53  
54 **4. Healthy changes**  
55

56  
57 Can you tell me about anything else that you do to try and manage your high blood pressure?  
58  
59  
60

1  
2  
3 There is an option on the HOME BP programme to look at online sessions about making healthy  
4 changes that can help lower your blood pressure, I wonder if you remember if you have seen it?  
5  
6  
7

8 *If no:*  
9

10  
11 Can you tell about how you might feel about making healthy changes to help lower your blood  
12 pressure?  
13  
14

15  
16  
17 *If yes:*  
18

19  
20 Can you tell me about how you found the session on healthy changes?  
21

22  
23 How did you feel about making the healthy changes this session talked about?  
24

25  
26 *If they chose a change:* Can you tell me about what made you choose this/these ones?  
27

28  
29 How did you find the online session about xxxx (cutting down on salt/alcohol/eating a healthier  
30 diet/doing more physical activity/ losing weight)?  
31  
32

33  
34 Can you tell me about what it was like for you trying out this healthy change?  
35

36  
37 How did making a healthy change like this make you feel?  
38

39  
40 *Or if they didn't choose any:* Can you tell me about why you didn't want to choose a healthy change?  
41

42  
43 *All:* Can you tell me about any concerns that you have about making a new healthy change?  
44

45  
46 Is there anything else you would like to tell me about the HOME BP study that we haven't already  
47 talked about?  
48  
49  
50

1  
2  
3 Usual care group interview schedule  
4  
5

6 General questions about BP  
7

8  
9 Can you tell me about what it is like for you to have high blood pressure?  
10

11  
12 How did you feel when you were first told you had high blood pressure?  
13

14  
15 Can you talk me through what (if anything) you currently do to manage/control your high blood  
16  
17 pressure?  
18

19  
20 Can you tell me about how your GP and practice nurse are involved in helping you to control  
21  
22 your high blood pressure?  
23

24  
25 How do you feel about monitoring your own blood pressure at home?  
26

27  
28 If they already monitor – can you tell me a bit more about this?  
29

30  
31 Can you tell me about what it's like for you taking medication for your high blood pressure?  
32

33  
34 Can you tell me how you feel about your GP making changes to your blood pressure medication?  
35  
36  
37

38 HOME BP study experience  
39

40  
41 Can you tell me why you signed up for the Home BP study?  
42

43  
44 Can you tell me all about what it has been like for you being in the HOME BP study in the usual  
45  
46 care group?  
47

48  
49 At the start of the HOME BP study, you had a baseline appointment with a nurse at your GP  
50  
51 Practice – can you tell me about that?  
52

53  
54 How did you find it using the HOME BP programme to fill in your questionnaires online at the  
55  
56 start of the study?  
57  
58  
59  
60

1  
2  
3 After you had completed your questionnaires, did you have an appointment with your GP to  
4  
5 check your blood pressure medication? Can you tell me about this?  
6  
7

8 HCP support  
9

10  
11 Can you tell me about the contact you have had with your GP or nurse so far in the HOME BP  
12  
13 study?  
14  
15

16  
17 Can you tell me about how you have found the support from your GP or nurse while you were  
18  
19 taking part in the HOME BP study?  
20  
21  
22  
23  
24  
25  
26  
27  
28  
29  
30  
31  
32  
33  
34  
35  
36  
37  
38  
39  
40  
41  
42  
43  
44  
45  
46  
47  
48  
49  
50  
51  
52  
53  
54  
55  
56  
57  
58  
59  
60
