# Supplementary material for: Qualitative process study to explore the perceived burdens and benefits of a digital intervention for self-managing high blood pressure in Primary Care in the UK
Source: BMJ Open. 2018 May 8;8(5):e020843. doi: 10.1136/bmjopen-2017-020843 (PMC5942415; doi:10.1136/bmjopen-2017-020843)
Supplement: Supplementary file 1 [file bmjopen-2017-020843supp001.pdf]

## Consolidated criteria for reporting qualitative studies (COREQ): 32-item checklist

Developed from:

Tong A, Sainsbury P, Craig J. Consolidated criteria for reporting qualitative research (COREQ): a 32-item checklist for interviews and focus groups. *International Journal for Quality in Health Care*. 2007. Volume 19, Number 6: pp. 349 – 357

**YOU MUST PROVIDE A RESPONSE FOR ALL ITEMS. ENTER N/A IF NOT APPLICABLE**

| No. Item                                       | Guide questions/description                                                                                                                              | Reported on Page # |
|------------------------------------------------|----------------------------------------------------------------------------------------------------------------------------------------------------------|--------------------|
| <b>Domain 1: Research team and reflexivity</b> |                                                                                                                                                          |                    |
| <i>Personal Characteristics</i>                |                                                                                                                                                          |                    |
| 1. Interviewer/facilitator                     | Which author/s conducted the interview or focus group?                                                                                                   | Page 9             |
| 2. Credentials                                 | What were the researcher's credentials? E.g. PhD, MD                                                                                                     | Page 9             |
| 3. Occupation                                  | What was their occupation at the time of the study?                                                                                                      | Page 9             |
| 4. Gender                                      | Was the researcher male or female?                                                                                                                       | Page 9             |
| 5. Experience and training                     | What experience or training did the researcher have?                                                                                                     | Page 9             |
| <i>Relationship with participants</i>          |                                                                                                                                                          |                    |
| 6. Relationship established                    | Was a relationship established prior to study commencement?                                                                                              | N/A                |
| 7. Participant knowledge of the interviewer    | What did the participants know about the researcher? e.g. personal goals, reasons for doing the research                                                 | N/A                |
| 8. Interviewer characteristics                 | What characteristics were reported about the interviewer/facilitator? e.g. Bias, assumptions, reasons and interests in the research topic                | Page 9             |
| <b>Domain 2: study design</b>                  |                                                                                                                                                          |                    |
| <i>Theoretical framework</i>                   |                                                                                                                                                          |                    |
| 9. Methodological orientation and Theory       | What methodological orientation was stated to underpin the study? e.g. grounded theory, discourse analysis, ethnography, phenomenology, content analysis | Page 9             |
| <i>Participant selection</i>                   |                                                                                                                                                          |                    |
| 10. Sampling                                   | How were participants selected? e.g. purposive, convenience, consecutive, snowball                                                                       | Page 8             |
| 11. Method of approach                         | How were participants approached? e.g. face-to-face, telephone, mail, email                                                                              | Page 8             |

|                                        |                                                                                                                                 |                    |
|----------------------------------------|---------------------------------------------------------------------------------------------------------------------------------|--------------------|
| 12. Sample size                        | How many participants were in the study?                                                                                        | Page 10            |
| 13. Non-participation                  | How many people refused to participate or dropped out? Reasons?                                                                 | Page 10            |
| <i>Setting</i>                         |                                                                                                                                 |                    |
| 14. Setting of data collection         | Where was the data collected? e.g. home, clinic, workplace                                                                      | Page 8             |
| 15. Presence of non-participants       | Was anyone else present besides the participants and researchers?                                                               | N/A                |
| 16. Description of sample              | What are the important characteristics of the sample? e.g. demographic data, date                                               | Page 11            |
| <i>Data collection</i>                 |                                                                                                                                 |                    |
| 17. Interview guide                    | Were questions, prompts, guides provided by the authors? Was it pilot tested?                                                   | Page 9             |
| 18. Repeat interviews                  | Were repeat inter views carried out? If yes, how many?                                                                          | N/A                |
| 19. Audio/visual recording             | Did the research use audio or visual recording to collect the data?                                                             | Page 9             |
| 20. Field notes                        | Were field notes made during and/or after the interview or focus group?                                                         | Page 9             |
| 21. Duration                           | What was the duration of the inter views or focus group?                                                                        | Page 11            |
| 22. Data saturation                    | Was data saturation discussed?                                                                                                  | Page 9             |
| 23. Transcripts returned               | Were transcripts returned to participants for comment and/or correction?                                                        | N/A                |
| <b>Domain 3: analysis and findings</b> |                                                                                                                                 |                    |
| <i>Data analysis</i>                   |                                                                                                                                 |                    |
| 24. Number of data coders              | How many data coders coded the data?                                                                                            | Page 9             |
| 25. Description of the coding tree     | Did authors provide a description of the coding tree?                                                                           | Page 13            |
| 26. Derivation of themes               | Were themes identified in advance or derived from the data?                                                                     | Page 9-10          |
| 27. Software                           | What software, if applicable, was used to manage the data?                                                                      | Page 10            |
| 28. Participant checking               | Did participants provide feedback on the findings?                                                                              | Page 26            |
| <i>Reporting</i>                       |                                                                                                                                 |                    |
| 29. Quotations presented               | Were participant quotations presented to illustrate the themes/findings? Was each quotation identified? e.g. participant number | Throughout results |
| 30. Data and findings consistent       | Was there consistency between the data presented and the findings?                                                              | Yes                |
| 31. Clarity of major themes            | Were major themes clearly presented in the findings?                                                                            | Yes                |
| 32. Clarity of minor themes            | Is there a description of diverse cases or discussion of minor themes?                                                          | Yes                |

Once you have completed this checklist, please save a copy and upload it as part of your submission. When requested to do so as part of the upload process, please select the file type: *Checklist*. You will NOT be able to proceed with submission unless the checklist has been uploaded. Please DO NOT include this checklist as part of the main manuscript document. It must be uploaded as a separate file.
